# Supplementary material for: Effect of geochemical conditions on PFAS release from AFFF-impacted saturated soil columns
Source: Royal Society of Chemistry journal article supplement (doi:10.1039/d2em00367h), 2023-01-01
Supplement: d2em00367h1.xlsx [file d2em00367h1.xlsx]

## Sheet: summary
Column	Analyte	Class	pv	cumulative mass eluted (ng)	original mass on soil (ng)	fraction mass eluted
pH 3_a	Cl-PFPrS	Chloro-PerFluoroAlkaneSulfonate	121.305	24.6199	13.5115	1.82215
pH 3_b	Cl-PFPrS	Chloro-PerFluoroAlkaneSulfonate	214.097	0	13.1465	0
pH 7_a	Cl-PFPrS	Chloro-PerFluoroAlkaneSulfonate	0.451345	0.568712	13.1567	0.0432259
pH 7_b	Cl-PFPrS	Chloro-PerFluoroAlkaneSulfonate	0.387697	8.67635	13.0947	0.662585
pH 10 Na_a	Cl-PFPrS	Chloro-PerFluoroAlkaneSulfonate	163.002	0	13.3223	0
pH 10 Na_b	Cl-PFPrS	Chloro-PerFluoroAlkaneSulfonate	166.747	27.2281	13.2708	2.05173
pH 3_a	Cl-PFBS	Chloro-PerFluoroAlkaneSulfonate	121.305	44.8637	21.3774	2.09865
pH 3_b	Cl-PFBS	Chloro-PerFluoroAlkaneSulfonate	214.097	30.4088	20.7999	1.46197
pH 7_a	Cl-PFBS	Chloro-PerFluoroAlkaneSulfonate	1.24147	37.2864	20.8162	1.79122
pH 7_b	Cl-PFBS	Chloro-PerFluoroAlkaneSulfonate	0.786616	32.7627	20.718	1.58136
pH 10 Na_a	Cl-PFBS	Chloro-PerFluoroAlkaneSulfonate	163.002	5.80262	21.0781	0.275291
pH 10 Na_b	Cl-PFBS	Chloro-PerFluoroAlkaneSulfonate	166.747	42.6251	20.9967	2.03009
pH 3_a	Cl-PFPeS	Chloro-PerFluoroAlkaneSulfonate	121.305	21.9114	41.2509	0.531174
pH 3_b	Cl-PFPeS	Chloro-PerFluoroAlkaneSulfonate	214.097	0	40.1365	0
pH 7_a	Cl-PFPeS	Chloro-PerFluoroAlkaneSulfonate	1.24147	25.8678	40.1679	0.643992
pH 7_b	Cl-PFPeS	Chloro-PerFluoroAlkaneSulfonate	1.38448	24.6818	39.9785	0.617377
pH 10 Na_a	Cl-PFPeS	Chloro-PerFluoroAlkaneSulfonate	163.002	15.5283	40.6734	0.38178
pH 10 Na_b	Cl-PFPeS	Chloro-PerFluoroAlkaneSulfonate	166.747	10.8241	40.5163	0.267155
pH 3_a	Cl-PFHxS	Chloro-PerFluoroAlkaneSulfonate	121.305	9.85801	135.533	0.072735
pH 3_b	Cl-PFHxS	Chloro-PerFluoroAlkaneSulfonate	214.097	0	131.872	0
pH 7_a	Cl-PFHxS	Chloro-PerFluoroAlkaneSulfonate	3.24328	85.539	131.975	0.648146
pH 7_b	Cl-PFHxS	Chloro-PerFluoroAlkaneSulfonate	3.20258	12.8872	131.353	0.0981116
pH 10 Na_a	Cl-PFHxS	Chloro-PerFluoroAlkaneSulfonate	163.002	0	133.636	0
pH 10 Na_b	Cl-PFHxS	Chloro-PerFluoroAlkaneSulfonate	166.747	10.7655	133.12	0.080871
pH 3_a	Cl-PFOS	Chloro-PerFluoroAlkaneSulfonate	121.305	49988.7	100441	0.49769
pH 3_b	Cl-PFOS	Chloro-PerFluoroAlkaneSulfonate	214.097	43559.2	97728.1	0.445718
pH 7_a	Cl-PFOS	Chloro-PerFluoroAlkaneSulfonate	196.229	27119.7	97804.6	0.277285
pH 7_b	Cl-PFOS	Chloro-PerFluoroAlkaneSulfonate	146.115	24923.3	97343.3	0.256035
pH 10 Na_a	Cl-PFOS	Chloro-PerFluoroAlkaneSulfonate	163.002	65733.5	99035.3	0.663739
pH 10 Na_b	Cl-PFOS	Chloro-PerFluoroAlkaneSulfonate	166.747	43784.4	98652.8	0.443824
pH 3_a	PFEtCHxS	cyclohexane sulfonate	121.305	3763.57	1365.04	2.75712
pH 3_b	PFEtCHxS	cyclohexane sulfonate	214.097	3588.59	1328.16	2.70192
pH 7_a	PFEtCHxS	cyclohexane sulfonate	196.229	6799.56	1329.2	5.11552
pH 7_b	PFEtCHxS	cyclohexane sulfonate	146.115	8647.45	1322.93	6.53657
pH 10 Na_a	PFEtCHxS	cyclohexane sulfonate	163.002	2805.69	1345.93	2.08458
pH 10 Na_b	PFEtCHxS	cyclohexane sulfonate	166.747	2629.98	1340.73	1.9616
pH 3_a	H-PFPrS	Hydrido-PerFluoroAlkane Sulfonate	121.305	917.163	119.867	7.65153
pH 3_b	H-PFPrS	Hydrido-PerFluoroAlkane Sulfonate	214.097	1821.64	116.628	15.6192
pH 7_a	H-PFPrS	Hydrido-PerFluoroAlkane Sulfonate	0.451345	103.654	116.72	0.888061
pH 7_b	H-PFPrS	Hydrido-PerFluoroAlkane Sulfonate	0.48054	95.6122	116.169	0.823042
pH 10 Na_a	H-PFPrS	Hydrido-PerFluoroAlkane Sulfonate	163.002	1476.77	118.188	12.495
pH 10 Na_b	H-PFPrS	Hydrido-PerFluoroAlkane Sulfonate	166.747	412.313	117.732	3.50213
pH 3_a	H-PFBS	Hydrido-PerFluoroAlkane Sulfonate	121.305	158.571	137.561	1.15274
pH 3_b	H-PFBS	Hydrido-PerFluoroAlkane Sulfonate	214.097	109.412	133.844	0.817458
pH 7_a	H-PFBS	Hydrido-PerFluoroAlkane Sulfonate	1.24147	80.6447	133.949	0.602054
pH 7_b	H-PFBS	Hydrido-PerFluoroAlkane Sulfonate	0.48054	84.1225	133.318	0.630993
pH 10 Na_a	H-PFBS	Hydrido-PerFluoroAlkane Sulfonate	163.002	78.559	135.635	0.579195
pH 10 Na_b	H-PFBS	Hydrido-PerFluoroAlkane Sulfonate	166.747	165.539	135.111	1.22521
pH 3_a	H-PFPeS	Hydrido-PerFluoroAlkane Sulfonate	121.305	38.749	106.067	0.365325
pH 3_b	H-PFPeS	Hydrido-PerFluoroAlkane Sulfonate	214.097	0	103.202	0
pH 7_a	H-PFPeS	Hydrido-PerFluoroAlkane Sulfonate	0.263744	16.8483	103.283	0.163128
pH 7_b	H-PFPeS	Hydrido-PerFluoroAlkane Sulfonate	0.786616	24.645	102.796	0.239747
pH 10 Na_a	H-PFPeS	Hydrido-PerFluoroAlkane Sulfonate	163.002	0	104.582	0
pH 10 Na_b	H-PFPeS	Hydrido-PerFluoroAlkane Sulfonate	166.747	0	104.178	0
pH 3_a	H-PFHxS	Hydrido-PerFluoroAlkane Sulfonate	121.305	0	332.549	0
pH 3_b	H-PFHxS	Hydrido-PerFluoroAlkane Sulfonate	214.097	0	323.565	0
pH 7_a	H-PFHxS	Hydrido-PerFluoroAlkane Sulfonate	0.839788	162.789	323.819	0.502717
pH 7_b	H-PFHxS	Hydrido-PerFluoroAlkane Sulfonate	2.30169	170.155	322.292	0.527955
pH 10 Na_a	H-PFHxS	Hydrido-PerFluoroAlkane Sulfonate	163.002	0	327.893	0
pH 10 Na_b	H-PFHxS	Hydrido-PerFluoroAlkane Sulfonate	166.747	0	326.627	0
pH 3_a	H-PFOS	Hydrido-PerFluoroAlkane Sulfonate	121.305	4231.01	18245.6	0.231892
pH 3_b	H-PFOS	Hydrido-PerFluoroAlkane Sulfonate	214.097	3674.57	17752.7	0.206986
pH 7_a	H-PFOS	Hydrido-PerFluoroAlkane Sulfonate	196.229	3335.25	17766.6	0.187726
pH 7_b	H-PFOS	Hydrido-PerFluoroAlkane Sulfonate	146.115	2438.01	17682.8	0.137874
pH 10 Na_a	H-PFOS	Hydrido-PerFluoroAlkane Sulfonate	163.002	3300.84	17990.2	0.18348
pH 10 Na_b	H-PFOS	Hydrido-PerFluoroAlkane Sulfonate	166.747	2998.79	17920.7	0.167337
pH 3_a	H-PFDS	Hydrido-PerFluoroAlkane Sulfonate	121.305	657.746	2239.49	0.293703
pH 3_b	H-PFDS	Hydrido-PerFluoroAlkane Sulfonate	214.097	1109.24	2178.99	0.509059
pH 10 Na_a	H-PFDS	Hydrido-PerFluoroAlkane Sulfonate	163.002	0	2208.14	0
pH 10 Na_b	H-PFDS	Hydrido-PerFluoroAlkane Sulfonate	166.747	0	2199.61	0
pH 3_a	K-PFBS	Keto-PerFluoroAlkaneSulfonate	121.305	48.3579	26.1337	1.8504
pH 3_b	K-PFBS	Keto-PerFluoroAlkaneSulfonate	214.097	0	25.4277	0
pH 7_a	K-PFBS	Keto-PerFluoroAlkaneSulfonate	0.263744	21.4068	25.4476	0.841211
pH 7_b	K-PFBS	Keto-PerFluoroAlkaneSulfonate	0.387697	24.5841	25.3276	0.970644
pH 10 Na_a	K-PFBS	Keto-PerFluoroAlkaneSulfonate	163.002	20.0882	25.7678	0.779586
pH 10 Na_b	K-PFBS	Keto-PerFluoroAlkaneSulfonate	166.747	45.9527	25.6683	1.79025
pH 3_a	K-PFPeS	Keto-PerFluoroAlkaneSulfonate	121.305	120.148	81.6972	1.47065
pH 3_b	K-PFPeS	Keto-PerFluoroAlkaneSulfonate	214.097	82.1975	79.4902	1.03406
pH 7_a	K-PFPeS	Keto-PerFluoroAlkaneSulfonate	1.24147	97.5608	79.5524	1.22637
pH 7_b	K-PFPeS	Keto-PerFluoroAlkaneSulfonate	1.38448	86.7601	79.1773	1.09577
pH 10 Na_a	K-PFPeS	Keto-PerFluoroAlkaneSulfonate	163.002	84.7472	80.5534	1.05206
pH 10 Na_b	K-PFPeS	Keto-PerFluoroAlkaneSulfonate	166.747	120.992	80.2423	1.50784
pH 3_a	K-PFHxS	Keto-PerFluoroAlkaneSulfonate	121.305	328.709	426.885	0.770019
pH 3_b	K-PFHxS	Keto-PerFluoroAlkaneSulfonate	214.097	293.389	415.353	0.706361
pH 7_a	K-PFHxS	Keto-PerFluoroAlkaneSulfonate	3.24328	257.365	415.678	0.619144
pH 7_b	K-PFHxS	Keto-PerFluoroAlkaneSulfonate	2.59655	220.31	413.718	0.532513
pH 10 Na_a	K-PFHxS	Keto-PerFluoroAlkaneSulfonate	163.002	346.044	420.909	0.822136
pH 10 Na_b	K-PFHxS	Keto-PerFluoroAlkaneSulfonate	166.747	374.205	419.283	0.892488
pH 3_a	K-PFHpS	Keto-PerFluoroAlkaneSulfonate	121.305	0	53.1268	0
pH 3_b	K-PFHpS	Keto-PerFluoroAlkaneSulfonate	214.097	0	51.6916	0
pH 7_a	K-PFHpS	Keto-PerFluoroAlkaneSulfonate	3.24328	32.6793	51.7321	0.631703
pH 7_b	K-PFHpS	Keto-PerFluoroAlkaneSulfonate	1.08453	14.2092	51.4881	0.275971
pH 10 Na_a	K-PFHpS	Keto-PerFluoroAlkaneSulfonate	163.002	0	52.383	0
pH 10 Na_b	K-PFHpS	Keto-PerFluoroAlkaneSulfonate	166.747	0	52.1807	0
pH 3_a	K-PFOS	Keto-PerFluoroAlkaneSulfonate	121.305	871.021	746.84	1.16628
pH 3_b	K-PFOS	Keto-PerFluoroAlkaneSulfonate	214.097	408.73	726.665	0.562475
pH 7_a	K-PFOS	Keto-PerFluoroAlkaneSulfonate	13.505	359.476	727.233	0.494306
pH 7_b	K-PFOS	Keto-PerFluoroAlkaneSulfonate	7.30196	216.793	723.804	0.299519
pH 10 Na_a	K-PFOS	Keto-PerFluoroAlkaneSulfonate	163.002	682.686	736.384	0.927079
pH 10 Na_b	K-PFOS	Keto-PerFluoroAlkaneSulfonate	166.747	502.603	733.54	0.685174
pH 3_a	K-PFNS	Keto-PerFluoroAlkaneSulfonate	121.305	0	2589.45	0
pH 3_b	K-PFNS	Keto-PerFluoroAlkaneSulfonate	214.097	0	2519.5	0
pH 7_a	K-PFNS	Keto-PerFluoroAlkaneSulfonate	131.279	17.8584	2521.47	0.00708253
pH 7_b	K-PFNS	Keto-PerFluoroAlkaneSulfonate	105.367	30.2903	2509.58	0.0120699
pH 10 Na_a	K-PFNS	Keto-PerFluoroAlkaneSulfonate	163.002	0	2553.2	0
pH 10 Na_b	K-PFNS	Keto-PerFluoroAlkaneSulfonate	166.747	0	2543.34	0
pH 3_a	CMeAmPr-FPrSA	N-CarboxyMethyldimethylAmmonioPropyl- perFluoroAlkaneSulfonamide	121.305	1932.38	10672.3	0.181064
pH 3_b	CMeAmPr-FPrSA	N-CarboxyMethyldimethylAmmonioPropyl- perFluoroAlkaneSulfonamide	214.097	1344.25	10384	0.129453
pH 7_a	CMeAmPr-FPrSA	N-CarboxyMethyldimethylAmmonioPropyl- perFluoroAlkaneSulfonamide	196.229	1393.64	10392.2	0.134105
pH 7_b	CMeAmPr-FPrSA	N-CarboxyMethyldimethylAmmonioPropyl- perFluoroAlkaneSulfonamide	146.115	1352.28	10343.2	0.130742
pH 10 Na_a	CMeAmPr-FPrSA	N-CarboxyMethyldimethylAmmonioPropyl- perFluoroAlkaneSulfonamide	163.002	2351.38	10522.9	0.223453
pH 10 Na_b	CMeAmPr-FPrSA	N-CarboxyMethyldimethylAmmonioPropyl- perFluoroAlkaneSulfonamide	166.747	2423.18	10482.3	0.231169
pH 3_a	CMeAmPr-FBSA	N-CarboxyMethyldimethylAmmonioPropyl- perFluoroAlkaneSulfonamide	121.305	18185.5	87062.7	0.208878
pH 3_b	CMeAmPr-FBSA	N-CarboxyMethyldimethylAmmonioPropyl- perFluoroAlkaneSulfonamide	214.097	14774.3	84710.7	0.174409
pH 7_a	CMeAmPr-FBSA	N-CarboxyMethyldimethylAmmonioPropyl- perFluoroAlkaneSulfonamide	196.229	10011.2	84777	0.118088
pH 7_b	CMeAmPr-FBSA	N-CarboxyMethyldimethylAmmonioPropyl- perFluoroAlkaneSulfonamide	146.115	8224.35	84377.2	0.0974712
pH 10 Na_a	CMeAmPr-FBSA	N-CarboxyMethyldimethylAmmonioPropyl- perFluoroAlkaneSulfonamide	163.002	24133.6	85843.8	0.281134
pH 10 Na_b	CMeAmPr-FBSA	N-CarboxyMethyldimethylAmmonioPropyl- perFluoroAlkaneSulfonamide	166.747	17984.7	85512.2	0.210317
pH 3_a	CMeAmPr-FPeSA	N-CarboxyMethyldimethylAmmonioPropyl- perFluoroAlkaneSulfonamide	121.305	20827.2	132327	0.157391
pH 3_b	CMeAmPr-FPeSA	N-CarboxyMethyldimethylAmmonioPropyl- perFluoroAlkaneSulfonamide	214.097	19125.3	128753	0.148543
pH 7_a	CMeAmPr-FPeSA	N-CarboxyMethyldimethylAmmonioPropyl- perFluoroAlkaneSulfonamide	196.229	12849.6	128853	0.0997225
pH 7_b	CMeAmPr-FPeSA	N-CarboxyMethyldimethylAmmonioPropyl- perFluoroAlkaneSulfonamide	146.115	11404.3	128246	0.0889256
pH 10 Na_a	CMeAmPr-FPeSA	N-CarboxyMethyldimethylAmmonioPropyl- perFluoroAlkaneSulfonamide	163.002	34803.8	130475	0.266747
pH 10 Na_b	CMeAmPr-FPeSA	N-CarboxyMethyldimethylAmmonioPropyl- perFluoroAlkaneSulfonamide	166.747	20049.5	129971	0.154261
pH 3_a	CMeAmPr-FHxSA	N-CarboxyMethyldimethylAmmonioPropyl- perFluoroAlkaneSulfonamide	121.305	44609.4	243389	0.183285
pH 3_b	CMeAmPr-FHxSA	N-CarboxyMethyldimethylAmmonioPropyl- perFluoroAlkaneSulfonamide	214.097	25340.4	236814	0.107006
pH 7_a	CMeAmPr-FHxSA	N-CarboxyMethyldimethylAmmonioPropyl- perFluoroAlkaneSulfonamide	196.229	25708.6	236999	0.108476
pH 7_b	CMeAmPr-FHxSA	N-CarboxyMethyldimethylAmmonioPropyl- perFluoroAlkaneSulfonamide	146.115	26304.1	235881	0.111514
pH 10 Na_a	CMeAmPr-FHxSA	N-CarboxyMethyldimethylAmmonioPropyl- perFluoroAlkaneSulfonamide	163.002	50586.8	239981	0.210795
pH 10 Na_b	CMeAmPr-FHxSA	N-CarboxyMethyldimethylAmmonioPropyl- perFluoroAlkaneSulfonamide	166.747	42620.3	239054	0.178287
pH 3_a	AmPr-FPrSA-PrA	N-dimethyl ammonio propyl perfluoralkane sulfonamido propanoic acid	121.305	17501.9	29721.6	0.588861
pH 3_b	AmPr-FPrSA-PrA	N-dimethyl ammonio propyl perfluoralkane sulfonamido propanoic acid	214.097	15278.8	28918.7	0.528336
pH 7_a	AmPr-FPrSA-PrA	N-dimethyl ammonio propyl perfluoralkane sulfonamido propanoic acid	196.229	7939.39	28941.4	0.274327
pH 7_b	AmPr-FPrSA-PrA	N-dimethyl ammonio propyl perfluoralkane sulfonamido propanoic acid	146.115	7251.14	28804.9	0.251733
pH 10 Na_a	AmPr-FPrSA-PrA	N-dimethyl ammonio propyl perfluoralkane sulfonamido propanoic acid	163.002	15477.7	29305.5	0.52815
pH 10 Na_b	AmPr-FPrSA-PrA	N-dimethyl ammonio propyl perfluoralkane sulfonamido propanoic acid	166.747	15582.4	29192.3	0.533784
pH 3_a	AmPr-FBSA-PrA	N-dimethyl ammonio propyl perfluoralkane sulfonamido propanoic acid	121.305	67791.1	142909	0.474365
pH 3_b	AmPr-FBSA-PrA	N-dimethyl ammonio propyl perfluoralkane sulfonamido propanoic acid	214.097	60673.6	139049	0.436348
pH 7_a	AmPr-FBSA-PrA	N-dimethyl ammonio propyl perfluoralkane sulfonamido propanoic acid	196.229	32802.3	139157	0.235721
pH 7_b	AmPr-FBSA-PrA	N-dimethyl ammonio propyl perfluoralkane sulfonamido propanoic acid	146.115	29445.3	138501	0.2126
pH 10 Na_a	AmPr-FBSA-PrA	N-dimethyl ammonio propyl perfluoralkane sulfonamido propanoic acid	163.002	61715.7	140909	0.437984
pH 10 Na_b	AmPr-FBSA-PrA	N-dimethyl ammonio propyl perfluoralkane sulfonamido propanoic acid	166.747	48353	140364	0.344482
pH 3_a	AmPr-FPeSA-PrA	N-dimethyl ammonio propyl perfluoralkane sulfonamido propanoic acid	121.305	27391.8	57151.9	0.479281
pH 3_b	AmPr-FPeSA-PrA	N-dimethyl ammonio propyl perfluoralkane sulfonamido propanoic acid	214.097	26469.3	55608	0.475998
pH 7_a	AmPr-FPeSA-PrA	N-dimethyl ammonio propyl perfluoralkane sulfonamido propanoic acid	196.229	15056	55651.5	0.270541
pH 7_b	AmPr-FPeSA-PrA	N-dimethyl ammonio propyl perfluoralkane sulfonamido propanoic acid	146.115	15875.5	55389.1	0.286617
pH 10 Na_a	AmPr-FPeSA-PrA	N-dimethyl ammonio propyl perfluoralkane sulfonamido propanoic acid	163.002	28012.9	56351.8	0.497107
pH 10 Na_b	AmPr-FPeSA-PrA	N-dimethyl ammonio propyl perfluoralkane sulfonamido propanoic acid	166.747	18683.3	56134.1	0.332833
pH 3_a	AmPr-FHxSA-PrA	N-dimethyl ammonio propyl perfluoralkane sulfonamido propanoic acid	121.305	32127.9	54186.5	0.592912
pH 3_b	AmPr-FHxSA-PrA	N-dimethyl ammonio propyl perfluoralkane sulfonamido propanoic acid	214.097	17216.6	52722.7	0.32655
pH 7_a	AmPr-FHxSA-PrA	N-dimethyl ammonio propyl perfluoralkane sulfonamido propanoic acid	196.229	15992.8	52764	0.303101
pH 7_b	AmPr-FHxSA-PrA	N-dimethyl ammonio propyl perfluoralkane sulfonamido propanoic acid	146.115	16101.1	52515.2	0.306598
pH 10 Na_a	AmPr-FHxSA-PrA	N-dimethyl ammonio propyl perfluoralkane sulfonamido propanoic acid	163.002	32775.6	53427.9	0.613454
pH 10 Na_b	AmPr-FHxSA-PrA	N-dimethyl ammonio propyl perfluoralkane sulfonamido propanoic acid	166.747	24224.1	53221.6	0.455156
pH 3_a	AmPr-FEtSA	N-dimethyl ammonio propyl perfluoroalkane sulfonamide	121.305	188.786	8989.74	0.0210001
pH 3_b	AmPr-FEtSA	N-dimethyl ammonio propyl perfluoroalkane sulfonamide	214.097	69.9714	8746.89	0.00799957
pH 7_a	AmPr-FEtSA	N-dimethyl ammonio propyl perfluoroalkane sulfonamide	17.0661	769.159	8753.74	0.0878664
pH 7_b	AmPr-FEtSA	N-dimethyl ammonio propyl perfluoroalkane sulfonamide	18.6258	744.924	8712.46	0.085501
pH 10 Na_a	AmPr-FEtSA	N-dimethyl ammonio propyl perfluoroalkane sulfonamide	163.002	436.83	8863.89	0.049282
pH 10 Na_b	AmPr-FEtSA	N-dimethyl ammonio propyl perfluoroalkane sulfonamide	166.747	94.4374	8829.66	0.0106955
pH 3_a	AmPr-FPrSA	N-dimethyl ammonio propyl perfluoroalkane sulfonamide	121.305	45653.8	260535	0.175231
pH 3_b	AmPr-FPrSA	N-dimethyl ammonio propyl perfluoroalkane sulfonamide	214.097	52125.4	253497	0.205625
pH 7_a	AmPr-FPrSA	N-dimethyl ammonio propyl perfluoroalkane sulfonamide	196.229	26581.1	253696	0.104776
pH 7_b	AmPr-FPrSA	N-dimethyl ammonio propyl perfluoroalkane sulfonamide	146.115	25985	252499	0.102911
pH 10 Na_a	AmPr-FPrSA	N-dimethyl ammonio propyl perfluoroalkane sulfonamide	163.002	57206.4	256888	0.22269
pH 10 Na_b	AmPr-FPrSA	N-dimethyl ammonio propyl perfluoroalkane sulfonamide	166.747	52750.9	255896	0.206142
pH 3_a	AmPr-FBSA	N-dimethyl ammonio propyl perfluoroalkane sulfonamide	121.305	71599.1	303416	0.235977
pH 3_b	AmPr-FBSA	N-dimethyl ammonio propyl perfluoroalkane sulfonamide	214.097	73138.5	295220	0.247742
pH 7_a	AmPr-FBSA	N-dimethyl ammonio propyl perfluoroalkane sulfonamide	196.229	39010.7	295451	0.132038
pH 7_b	AmPr-FBSA	N-dimethyl ammonio propyl perfluoroalkane sulfonamide	146.115	35372.3	294058	0.12029
pH 10 Na_a	AmPr-FBSA	N-dimethyl ammonio propyl perfluoroalkane sulfonamide	163.002	82667.9	299168	0.276326
pH 10 Na_b	AmPr-FBSA	N-dimethyl ammonio propyl perfluoroalkane sulfonamide	166.747	67202.2	298013	0.225501
pH 3_a	AmPr-FPeSA	N-dimethyl ammonio propyl perfluoroalkane sulfonamide	121.305	21466.4	119716	0.179311
pH 3_b	AmPr-FPeSA	N-dimethyl ammonio propyl perfluoroalkane sulfonamide	214.097	12848.5	116482	0.110304
pH 7_a	AmPr-FPeSA	N-dimethyl ammonio propyl perfluoroalkane sulfonamide	196.229	12894.8	116573	0.110615
pH 7_b	AmPr-FPeSA	N-dimethyl ammonio propyl perfluoroalkane sulfonamide	146.115	12235.1	116023	0.105453
pH 10 Na_a	AmPr-FPeSA	N-dimethyl ammonio propyl perfluoroalkane sulfonamide	163.002	29594.2	118040	0.250713
pH 10 Na_b	AmPr-FPeSA	N-dimethyl ammonio propyl perfluoroalkane sulfonamide	166.747	21273.7	117584	0.180923
pH 3_a	AmPr-FHxSA	N-dimethyl ammonio propyl perfluoroalkane sulfonamide	121.305	18180.8	123996	0.146624
pH 3_b	AmPr-FHxSA	N-dimethyl ammonio propyl perfluoroalkane sulfonamide	214.097	2072.18	120646	0.0171757
pH 7_a	AmPr-FHxSA	N-dimethyl ammonio propyl perfluoroalkane sulfonamide	196.229	16340.4	120740	0.135335
pH 7_b	AmPr-FHxSA	N-dimethyl ammonio propyl perfluoroalkane sulfonamide	146.115	14196.5	120171	0.118136
pH 10 Na_a	AmPr-FHxSA	N-dimethyl ammonio propyl perfluoroalkane sulfonamide	163.002	43871.2	122260	0.358836
pH 10 Na_b	AmPr-FHxSA	N-dimethyl ammonio propyl perfluoroalkane sulfonamide	166.747	32642.5	121788	0.268028
pH 3_a	EtFOSAA	N-EthylperFluoroAlkaneSulfonamidoAcetic Acid	121.305	0	564.604	0
pH 3_b	EtFOSAA	N-EthylperFluoroAlkaneSulfonamidoAcetic Acid	214.097	0	549.352	0
pH 7_a	EtFOSAA	N-EthylperFluoroAlkaneSulfonamidoAcetic Acid	196.229	0	549.782	0
pH 7_b	EtFOSAA	N-EthylperFluoroAlkaneSulfonamidoAcetic Acid	146.115	0	547.189	0
pH 10 Na_a	EtFOSAA	N-EthylperFluoroAlkaneSulfonamidoAcetic Acid	163.002	0	556.7	0
pH 10 Na_b	EtFOSAA	N-EthylperFluoroAlkaneSulfonamidoAcetic Acid	166.747	0	554.55	0
pH 3_a	MeFPrSA	N-methyl perfluoroalkane sulfonamide	121.305	6.2297	255.156	0.0244152
pH 3_b	MeFPrSA	N-methyl perfluoroalkane sulfonamide	214.097	0	248.264	0
pH 7_a	MeFPrSA	N-methyl perfluoroalkane sulfonamide	3.24328	14.6589	248.458	0.0589996
pH 7_b	MeFPrSA	N-methyl perfluoroalkane sulfonamide	2.59655	15.5775	247.286	0.0629937
pH 10 Na_a	MeFPrSA	N-methyl perfluoroalkane sulfonamide	163.002	29.1277	251.584	0.115777
pH 10 Na_b	MeFPrSA	N-methyl perfluoroalkane sulfonamide	166.747	15.5411	250.613	0.0620123
pH 3_a	MeFBSA	N-methyl perfluoroalkane sulfonamide	121.305	881.934	4038.38	0.218388
pH 3_b	MeFBSA	N-methyl perfluoroalkane sulfonamide	214.097	410.738	3929.28	0.104533
pH 7_a	MeFBSA	N-methyl perfluoroalkane sulfonamide	24.8703	401.826	3932.36	0.102184
pH 7_b	MeFBSA	N-methyl perfluoroalkane sulfonamide	96.7558	552.768	3913.82	0.141235
pH 10 Na_a	MeFBSA	N-methyl perfluoroalkane sulfonamide	163.002	1219.87	3981.84	0.306359
pH 10 Na_b	MeFBSA	N-methyl perfluoroalkane sulfonamide	166.747	546.33	3966.46	0.137737
pH 3_a	MeFPeSA	N-methyl perfluoroalkane sulfonamide	121.305	4519.23	14648.5	0.308511
pH 3_b	MeFPeSA	N-methyl perfluoroalkane sulfonamide	214.097	4851.87	14252.8	0.340415
pH 7_a	MeFPeSA	N-methyl perfluoroalkane sulfonamide	196.229	834.815	14264	0.0585262
pH 7_b	MeFPeSA	N-methyl perfluoroalkane sulfonamide	120.407	887.375	14196.7	0.0625057
pH 10 Na_a	MeFPeSA	N-methyl perfluoroalkane sulfonamide	163.002	4772.29	14443.5	0.330412
pH 10 Na_b	MeFPeSA	N-methyl perfluoroalkane sulfonamide	166.747	2881.42	14387.7	0.20027
pH 3_a	MeFHxSA	N-methyl perfluoroalkane sulfonamide	121.305	25860	50690.5	0.510155
pH 3_b	MeFHxSA	N-methyl perfluoroalkane sulfonamide	214.097	29133.8	49321.1	0.590696
pH 7_a	MeFHxSA	N-methyl perfluoroalkane sulfonamide	196.229	9396.4	49359.7	0.190366
pH 7_b	MeFHxSA	N-methyl perfluoroalkane sulfonamide	146.115	7975.09	49126.9	0.162337
pH 10 Na_a	MeFHxSA	N-methyl perfluoroalkane sulfonamide	163.002	27502.1	49980.8	0.550253
pH 10 Na_b	MeFHxSA	N-methyl perfluoroalkane sulfonamide	166.747	20021.8	49787.8	0.402143
pH 3_a	MeFOSA	N-methyl perfluoroalkane sulfonamide	121.305	214.275	252.93	0.847169
pH 3_b	MeFOSA	N-methyl perfluoroalkane sulfonamide	214.097	0	246.097	0
pH 7_a	MeFOSA	N-methyl perfluoroalkane sulfonamide	196.229	23.5459	246.29	0.0956024
pH 7_b	MeFOSA	N-methyl perfluoroalkane sulfonamide	146.115	1.76138	245.128	0.00718553
pH 10 Na_a	MeFOSA	N-methyl perfluoroalkane sulfonamide	163.002	0	249.389	0
pH 10 Na_b	MeFOSA	N-methyl perfluoroalkane sulfonamide	166.747	0	248.426	0
pH 3_a	MeFEtSAA	N-MethylperFluoroAlkaneSulfonamidoAcetic Acid	121.305	201.159	NA	NA
pH 3_b	MeFEtSAA	N-MethylperFluoroAlkaneSulfonamidoAcetic Acid	214.097	187.653	NA	NA
pH 7_a	MeFEtSAA	N-MethylperFluoroAlkaneSulfonamidoAcetic Acid	0.451345	48.4089	NA	NA
pH 7_b	MeFEtSAA	N-MethylperFluoroAlkaneSulfonamidoAcetic Acid	0.48054	62.2886	NA	NA
pH 10 Na_a	MeFEtSAA	N-MethylperFluoroAlkaneSulfonamidoAcetic Acid	163.002	157.85	NA	NA
pH 10 Na_b	MeFEtSAA	N-MethylperFluoroAlkaneSulfonamidoAcetic Acid	166.747	225.274	NA	NA
pH 3_a	MeFBSAA	N-MethylperFluoroAlkaneSulfonamidoAcetic Acid	121.305	21443.8	48157.5	0.445284
pH 3_b	MeFBSAA	N-MethylperFluoroAlkaneSulfonamidoAcetic Acid	214.097	22127.2	46856.6	0.472234
pH 7_a	MeFBSAA	N-MethylperFluoroAlkaneSulfonamidoAcetic Acid	196.229	14192.1	46893.2	0.302647
pH 7_b	MeFBSAA	N-MethylperFluoroAlkaneSulfonamidoAcetic Acid	146.115	15195.8	46672.1	0.325587
pH 10 Na_a	MeFBSAA	N-MethylperFluoroAlkaneSulfonamidoAcetic Acid	163.002	19209.4	47483.3	0.40455
pH 10 Na_b	MeFBSAA	N-MethylperFluoroAlkaneSulfonamidoAcetic Acid	166.747	19361.1	47299.9	0.409327
pH 3_a	MeFPeSAA	N-MethylperFluoroAlkaneSulfonamidoAcetic Acid	121.305	19575.9	36975.4	0.52943
pH 3_b	MeFPeSAA	N-MethylperFluoroAlkaneSulfonamidoAcetic Acid	214.097	19216.4	35976.6	0.534136
pH 7_a	MeFPeSAA	N-MethylperFluoroAlkaneSulfonamidoAcetic Acid	196.229	16506.6	36004.7	0.458458
pH 7_b	MeFPeSAA	N-MethylperFluoroAlkaneSulfonamidoAcetic Acid	146.115	15463.8	35834.9	0.431529
pH 10 Na_a	MeFPeSAA	N-MethylperFluoroAlkaneSulfonamidoAcetic Acid	163.002	19077.6	36457.8	0.523281
pH 10 Na_b	MeFPeSAA	N-MethylperFluoroAlkaneSulfonamidoAcetic Acid	166.747	15893.8	36317	0.437642
pH 3_a	MeFHxSAA	N-MethylperFluoroAlkaneSulfonamidoAcetic Acid	121.305	96607.8	143061	0.675292
pH 3_b	MeFHxSAA	N-MethylperFluoroAlkaneSulfonamidoAcetic Acid	214.097	83210.2	139196	0.597791
pH 7_a	MeFHxSAA	N-MethylperFluoroAlkaneSulfonamidoAcetic Acid	196.229	52966.5	139305	0.380219
pH 7_b	MeFHxSAA	N-MethylperFluoroAlkaneSulfonamidoAcetic Acid	146.115	46361.8	138648	0.334385
pH 10 Na_a	MeFHxSAA	N-MethylperFluoroAlkaneSulfonamidoAcetic Acid	163.002	135772	141058	0.962527
pH 10 Na_b	MeFHxSAA	N-MethylperFluoroAlkaneSulfonamidoAcetic Acid	166.747	137025	140513	0.975178
pH 3_a	MeFHpSAA	N-MethylperFluoroAlkaneSulfonamidoAcetic Acid	121.305	94.4075	1523.13	0.0619824
pH 3_b	MeFHpSAA	N-MethylperFluoroAlkaneSulfonamidoAcetic Acid	214.097	0	1481.99	0
pH 10 Na_a	MeFHpSAA	N-MethylperFluoroAlkaneSulfonamidoAcetic Acid	163.002	398.163	1501.81	0.265122
pH 10 Na_b	MeFHpSAA	N-MethylperFluoroAlkaneSulfonamidoAcetic Acid	166.747	165.285	1496.01	0.110484
pH 3_a	MeFOSAA	N-MethylperFluoroAlkaneSulfonamidoAcetic Acid	121.305	5100.03	4675.75	1.09074
pH 3_b	MeFOSAA	N-MethylperFluoroAlkaneSulfonamidoAcetic Acid	214.097	1380.58	4549.44	0.30346
pH 7_a	MeFOSAA	N-MethylperFluoroAlkaneSulfonamidoAcetic Acid	196.229	2870.46	4553	0.630454
pH 7_b	MeFOSAA	N-MethylperFluoroAlkaneSulfonamidoAcetic Acid	146.115	2941.53	4531.53	0.649126
pH 10 Na_a	MeFOSAA	N-MethylperFluoroAlkaneSulfonamidoAcetic Acid	163.002	8914.75	4610.29	1.93366
pH 10 Na_b	MeFOSAA	N-MethylperFluoroAlkaneSulfonamidoAcetic Acid	166.747	5628.42	4592.49	1.22557
pH 3_a	SPrAmPr-FHxSA	N-Sulfo Propyl dimethyl Ammonio Propyl perFluoroAlkaneSulfonamide	121.305	15936.5	67235.8	0.237024
pH 3_b	SPrAmPr-FHxSA	N-Sulfo Propyl dimethyl Ammonio Propyl perFluoroAlkaneSulfonamide	214.097	12110.4	65419.5	0.185119
pH 7_a	SPrAmPr-FHxSA	N-Sulfo Propyl dimethyl Ammonio Propyl perFluoroAlkaneSulfonamide	196.229	15025.2	65470.7	0.229495
pH 7_b	SPrAmPr-FHxSA	N-Sulfo Propyl dimethyl Ammonio Propyl perFluoroAlkaneSulfonamide	146.115	13312.3	65162	0.204296
pH 10 Na_a	SPrAmPr-FHxSA	N-Sulfo Propyl dimethyl Ammonio Propyl perFluoroAlkaneSulfonamide	163.002	26241.9	66294.5	0.395838
pH 10 Na_b	SPrAmPr-FHxSA	N-Sulfo Propyl dimethyl Ammonio Propyl perFluoroAlkaneSulfonamide	166.747	14386	66038.5	0.217843
pH 3_a	O-PFHxS	Oxa-PerFluoroAlkaneSulfonate	121.305	78.0573	98.9232	0.78907
pH 3_b	O-PFHxS	Oxa-PerFluoroAlkaneSulfonate	214.097	57.8034	96.2508	0.60055
pH 7_a	O-PFHxS	Oxa-PerFluoroAlkaneSulfonate	2.0316	64.5841	96.3262	0.670473
pH 7_b	O-PFHxS	Oxa-PerFluoroAlkaneSulfonate	1.68342	52.8696	95.8719	0.551461
pH 10 Na_a	O-PFHxS	Oxa-PerFluoroAlkaneSulfonate	163.002	81.453	97.5382	0.835088
pH 10 Na_b	O-PFHxS	Oxa-PerFluoroAlkaneSulfonate	166.747	70.5787	97.1615	0.726406
pH 3_a	O-PFHpS	Oxa-PerFluoroAlkaneSulfonate	121.305	41.3151	105.545	0.391447
pH 3_b	O-PFHpS	Oxa-PerFluoroAlkaneSulfonate	214.097	11.0176	102.693	0.107286
pH 7_a	O-PFHpS	Oxa-PerFluoroAlkaneSulfonate	4.20777	60.3197	102.774	0.586917
pH 7_b	O-PFHpS	Oxa-PerFluoroAlkaneSulfonate	3.49641	46.3894	102.289	0.453513
pH 10 Na_a	O-PFHpS	Oxa-PerFluoroAlkaneSulfonate	163.002	35.6473	104.067	0.342542
pH 10 Na_b	O-PFHpS	Oxa-PerFluoroAlkaneSulfonate	166.747	0	103.665	0
pH 3_a	O-PFOS	Oxa-PerFluoroAlkaneSulfonate	121.305	79.1166	73.7486	1.07279
pH 3_b	O-PFOS	Oxa-PerFluoroAlkaneSulfonate	214.097	8.85837	71.7564	0.123451
pH 7_a	O-PFOS	Oxa-PerFluoroAlkaneSulfonate	4.20777	18.0802	71.8125	0.251769
pH 7_b	O-PFOS	Oxa-PerFluoroAlkaneSulfonate	3.49641	12.9818	71.4739	0.181629
pH 10 Na_a	O-PFOS	Oxa-PerFluoroAlkaneSulfonate	163.002	41.0511	72.7162	0.564539
pH 10 Na_b	O-PFOS	Oxa-PerFluoroAlkaneSulfonate	166.747	0	72.4353	0
pH 3_a	FPrSA	perFluoroAlkane SulfonAmide	121.305	32430.2	32548.2	0.996375
pH 3_b	FPrSA	perFluoroAlkane SulfonAmide	214.097	33261.8	31668.9	1.0503
pH 7_a	FPrSA	perFluoroAlkane SulfonAmide	196.229	8501.8	31693.7	0.268249
pH 7_b	FPrSA	perFluoroAlkane SulfonAmide	146.115	9712.87	31544.2	0.307912
pH 10 Na_a	FPrSA	perFluoroAlkane SulfonAmide	163.002	38306	32092.5	1.19361
pH 10 Na_b	FPrSA	perFluoroAlkane SulfonAmide	166.747	51599.7	31968.6	1.61408
pH 3_a	FBSA	perFluoroAlkane SulfonAmide	121.305	95071.5	81354.5	1.16861
pH 3_b	FBSA	perFluoroAlkane SulfonAmide	214.097	98654.7	79156.8	1.24632
pH 7_a	FBSA	perFluoroAlkane SulfonAmide	196.229	25872.7	79218.7	0.326598
pH 7_b	FBSA	perFluoroAlkane SulfonAmide	146.115	29004.7	78845.1	0.367869
pH 10 Na_a	FBSA	perFluoroAlkane SulfonAmide	163.002	120869	80215.5	1.5068
pH 10 Na_b	FBSA	perFluoroAlkane SulfonAmide	166.747	130029	79905.7	1.62728
pH 3_a	FPeSA	perFluoroAlkane SulfonAmide	121.305	225446	156639	1.43927
pH 3_b	FPeSA	perFluoroAlkane SulfonAmide	214.097	229837	152407	1.50804
pH 7_a	FPeSA	perFluoroAlkane SulfonAmide	196.229	65260.1	152527	0.42786
pH 7_b	FPeSA	perFluoroAlkane SulfonAmide	146.115	54091	151807	0.356313
pH 10 Na_a	FPeSA	perFluoroAlkane SulfonAmide	163.002	294601	154446	1.90747
pH 10 Na_b	FPeSA	perFluoroAlkane SulfonAmide	166.747	244765	153849	1.59094
pH 3_a	FHxSA	perFluoroAlkane SulfonAmide	121.305	2.59547e+06	807941	3.21246
pH 3_b	FHxSA	perFluoroAlkane SulfonAmide	214.097	3.20783e+06	786115	4.08061
pH 7_a	FHxSA	perFluoroAlkane SulfonAmide	196.229	1.00625e+06	786730	1.27902
pH 7_b	FHxSA	perFluoroAlkane SulfonAmide	146.115	1.03707e+06	783020	1.32445
pH 10 Na_a	FHxSA	perFluoroAlkane SulfonAmide	163.002	2.61578e+06	796630	3.28355
pH 10 Na_b	FHxSA	perFluoroAlkane SulfonAmide	166.747	2.46635e+06	793553	3.10798
pH 3_a	FHpSA	perFluoroAlkane SulfonAmide	121.305	32021.7	8871.25	3.6096
pH 3_b	FHpSA	perFluoroAlkane SulfonAmide	214.097	74194.9	8631.6	8.59573
pH 7_a	FHpSA	perFluoroAlkane SulfonAmide	196.229	61120.2	8638.35	7.07545
pH 7_b	FHpSA	perFluoroAlkane SulfonAmide	146.115	NA	8597.62	NA
pH 10 Na_a	FHpSA	perFluoroAlkane SulfonAmide	163.002	26554.7	8747.05	3.03585
pH 10 Na_b	FHpSA	perFluoroAlkane SulfonAmide	166.747	26044.3	8713.27	2.98904
pH 3_a	FOSA	perFluoroAlkane SulfonAmide	121.305	6924.1	6930.18	0.999123
pH 3_b	FOSA	perFluoroAlkane SulfonAmide	214.097	4822.81	6742.96	0.715236
pH 7_a	FOSA	perFluoroAlkane SulfonAmide	196.229	6069.24	6748.24	0.899382
pH 7_b	FOSA	perFluoroAlkane SulfonAmide	146.115	5621.7	6716.42	0.837008
pH 10 Na_a	FOSA	perFluoroAlkane SulfonAmide	163.002	18064	6833.15	2.64358
pH 10 Na_b	FOSA	perFluoroAlkane SulfonAmide	166.747	15506.9	6806.76	2.27816
pH 3_a	PFPrS	Perfluoroalkane sulfonate	121.305	13633.8	12645.6	1.07814
pH 3_b	PFPrS	Perfluoroalkane sulfonate	214.097	12980	12304	1.05494
pH 7_a	PFPrS	Perfluoroalkane sulfonate	196.229	8703.61	12313.6	0.706828
pH 7_b	PFPrS	Perfluoroalkane sulfonate	146.115	9551.09	12255.5	0.779328
pH 10 Na_a	PFPrS	Perfluoroalkane sulfonate	163.002	6911.38	12468.6	0.554305
pH 10 Na_b	PFPrS	Perfluoroalkane sulfonate	166.747	16012.3	12420.4	1.28919
pH 3_a	PFBS	Perfluoroalkane sulfonate	121.305	20421.9	12919.6	1.58069
pH 3_b	PFBS	Perfluoroalkane sulfonate	214.097	22320.1	12570.6	1.77558
pH 7_a	PFBS	Perfluoroalkane sulfonate	196.229	17524.4	12580.4	1.39299
pH 7_b	PFBS	Perfluoroalkane sulfonate	146.115	18214.5	12521.1	1.4547
pH 10 Na_a	PFBS	Perfluoroalkane sulfonate	163.002	15870.4	12738.7	1.24584
pH 10 Na_b	PFBS	Perfluoroalkane sulfonate	166.747	24671	12689.5	1.9442
pH 3_a	PFPeS	Perfluoroalkane sulfonate	121.305	24469.8	29235.6	0.836987
pH 3_b	PFPeS	Perfluoroalkane sulfonate	214.097	25789.2	28445.9	0.906605
pH 7_a	PFPeS	Perfluoroalkane sulfonate	196.229	16975.5	28468.1	0.5963
pH 7_b	PFPeS	Perfluoroalkane sulfonate	146.115	17017.7	28333.9	0.600612
pH 10 Na_a	PFPeS	Perfluoroalkane sulfonate	163.002	24234	28826.3	0.840689
pH 10 Na_b	PFPeS	Perfluoroalkane sulfonate	166.747	29232.7	28715	1.01803
pH 3_a	PFHxS	Perfluoroalkane sulfonate	121.305	105945	82700.5	1.28107
pH 3_b	PFHxS	Perfluoroalkane sulfonate	214.097	111179	80466.4	1.38168
pH 7_a	PFHxS	Perfluoroalkane sulfonate	196.229	81032.1	80529.4	1.00624
pH 7_b	PFHxS	Perfluoroalkane sulfonate	146.115	78689.5	80149.7	0.981782
pH 10 Na_a	PFHxS	Perfluoroalkane sulfonate	163.002	111122	81542.7	1.36274
pH 10 Na_b	PFHxS	Perfluoroalkane sulfonate	166.747	107601	81227.8	1.32468
pH 3_a	PFHpS	Perfluoroalkane sulfonate	121.305	11388.6	4673.02	2.4371
pH 3_b	PFHpS	Perfluoroalkane sulfonate	214.097	8504.96	4546.78	1.87055
pH 7_a	PFHpS	Perfluoroalkane sulfonate	196.229	5769.49	4550.34	1.26793
pH 7_b	PFHpS	Perfluoroalkane sulfonate	146.115	4370.52	4528.88	0.965033
pH 10 Na_a	PFHpS	Perfluoroalkane sulfonate	163.002	8446.26	4607.6	1.83312
pH 10 Na_b	PFHpS	Perfluoroalkane sulfonate	166.747	7150.68	4589.8	1.55795
pH 3_a	PFOS	Perfluoroalkane sulfonate	121.305	3.49599e+06	3.77797e+06	0.925361
pH 3_b	PFOS	Perfluoroalkane sulfonate	214.097	3.37282e+06	3.67591e+06	0.917546
pH 7_a	PFOS	Perfluoroalkane sulfonate	196.229	2.60654e+06	3.67879e+06	0.708531
pH 7_b	PFOS	Perfluoroalkane sulfonate	146.115	2.55733e+06	3.66144e+06	0.698449
pH 10 Na_a	PFOS	Perfluoroalkane sulfonate	163.002	3.61299e+06	3.72508e+06	0.969909
pH 10 Na_b	PFOS	Perfluoroalkane sulfonate	166.747	2.66131e+06	3.71069e+06	0.717199
pH 3_a	PFNS	Perfluoroalkane sulfonate	121.305	18350.2	103378	0.177507
pH 3_b	PFNS	Perfluoroalkane sulfonate	214.097	11969.4	100585	0.118998
pH 7_a	PFNS	Perfluoroalkane sulfonate	196.229	12401.8	100664	0.123201
pH 7_b	PFNS	Perfluoroalkane sulfonate	146.115	11609.7	100189	0.115878
pH 10 Na_a	PFNS	Perfluoroalkane sulfonate	163.002	22924.1	101930	0.2249
pH 10 Na_b	PFNS	Perfluoroalkane sulfonate	166.747	18427.8	101537	0.181489
pH 3_a	PFDS	Perfluoroalkane sulfonate	121.305	0	5059.16	0
pH 3_b	PFDS	Perfluoroalkane sulfonate	214.097	0	4922.49	0
pH 7_a	PFDS	Perfluoroalkane sulfonate	196.229	270.278	4926.34	0.0548638
pH 7_b	PFDS	Perfluoroalkane sulfonate	146.115	150.626	4903.11	0.0307205
pH 10 Na_a	PFDS	Perfluoroalkane sulfonate	163.002	0	4988.33	0
pH 10 Na_b	PFDS	Perfluoroalkane sulfonate	166.747	0	4969.06	0
pH 3_a	PFDoS	Perfluoroalkane sulfonate	121.305	0	330.203	0
pH 3_b	PFDoS	Perfluoroalkane sulfonate	214.097	0	321.283	0
pH 7_a	PFDoS	Perfluoroalkane sulfonate	196.229	4.36881	321.535	0.0135874
pH 7_b	PFDoS	Perfluoroalkane sulfonate	146.115	0	320.018	0
pH 10 Na_a	PFDoS	Perfluoroalkane sulfonate	163.002	0	325.581	0
pH 10 Na_b	PFDoS	Perfluoroalkane sulfonate	166.747	0	324.323	0
pH 3_a	PFPrSi	PerFluoroAlkaneSulfinate	121.305	145.603	110.849	1.31352
pH 3_b	PFPrSi	PerFluoroAlkaneSulfinate	214.097	58.9958	107.854	0.546994
pH 7_a	PFPrSi	PerFluoroAlkaneSulfinate	196.229	95.6363	107.939	0.886023
pH 7_b	PFPrSi	PerFluoroAlkaneSulfinate	146.115	123.659	107.43	1.15106
pH 10 Na_a	PFPrSi	PerFluoroAlkaneSulfinate	163.002	115.468	109.297	1.05646
pH 10 Na_b	PFPrSi	PerFluoroAlkaneSulfinate	166.747	89.2489	108.875	0.819738
pH 3_a	PFBSi	PerFluoroAlkaneSulfinate	121.305	496.349	222.737	2.22841
pH 3_b	PFBSi	PerFluoroAlkaneSulfinate	214.097	391.805	216.72	1.80789
pH 7_a	PFBSi	PerFluoroAlkaneSulfinate	196.229	365.602	216.889	1.68567
pH 7_b	PFBSi	PerFluoroAlkaneSulfinate	146.115	320	215.866	1.4824
pH 10 Na_a	PFBSi	PerFluoroAlkaneSulfinate	163.002	438.642	219.618	1.99729
pH 10 Na_b	PFBSi	PerFluoroAlkaneSulfinate	166.747	377.547	218.77	1.72577
pH 3_a	PFPeSi	PerFluoroAlkaneSulfinate	121.305	808.409	593.129	1.36296
pH 3_b	PFPeSi	PerFluoroAlkaneSulfinate	214.097	808.104	577.106	1.40027
pH 7_a	PFPeSi	PerFluoroAlkaneSulfinate	196.229	490.511	577.558	0.849284
pH 7_b	PFPeSi	PerFluoroAlkaneSulfinate	146.115	428.969	574.835	0.746248
pH 10 Na_a	PFPeSi	PerFluoroAlkaneSulfinate	163.002	761.983	584.826	1.30292
pH 10 Na_b	PFPeSi	PerFluoroAlkaneSulfinate	166.747	747.949	582.567	1.28388
pH 3_a	PFHxSi	PerFluoroAlkaneSulfinate	121.305	5793.88	3485.07	1.66248
pH 3_b	PFHxSi	PerFluoroAlkaneSulfinate	214.097	5727.55	3390.93	1.68908
pH 7_a	PFHxSi	PerFluoroAlkaneSulfinate	196.229	3592.11	3393.58	1.0585
pH 7_b	PFHxSi	PerFluoroAlkaneSulfinate	146.115	3294.83	3377.58	0.975502
pH 10 Na_a	PFHxSi	PerFluoroAlkaneSulfinate	163.002	5667.35	3436.28	1.64927
pH 10 Na_b	PFHxSi	PerFluoroAlkaneSulfinate	166.747	5035.73	3423.01	1.47114
pH 3_a	FPrSAA	perfluoroAlkaneSulfonamidoAcetic Acid	121.305	4257.63	2603.84	1.63514
pH 3_b	FPrSAA	perfluoroAlkaneSulfonamidoAcetic Acid	214.097	3831.81	2533.5	1.51246
pH 7_a	FPrSAA	perfluoroAlkaneSulfonamidoAcetic Acid	196.229	813.696	2535.48	0.320924
pH 7_b	FPrSAA	perfluoroAlkaneSulfonamidoAcetic Acid	146.115	930.341	2523.53	0.368667
pH 10 Na_a	FPrSAA	perfluoroAlkaneSulfonamidoAcetic Acid	163.002	3065.37	2567.39	1.19396
pH 10 Na_b	FPrSAA	perfluoroAlkaneSulfonamidoAcetic Acid	166.747	4667.36	2557.47	1.82499
pH 3_a	FBSAA	perfluoroAlkaneSulfonamidoAcetic Acid	121.305	6931.92	7029.58	0.986107
pH 3_b	FBSAA	perfluoroAlkaneSulfonamidoAcetic Acid	214.097	7016.65	6839.68	1.02587
pH 7_a	FBSAA	perfluoroAlkaneSulfonamidoAcetic Acid	196.229	1301.85	6845.04	0.190189
pH 7_b	FBSAA	perfluoroAlkaneSulfonamidoAcetic Acid	146.115	1534.66	6812.76	0.225262
pH 10 Na_a	FBSAA	perfluoroAlkaneSulfonamidoAcetic Acid	163.002	5214.27	6931.17	0.752292
pH 10 Na_b	FBSAA	perfluoroAlkaneSulfonamidoAcetic Acid	166.747	6395.13	6904.4	0.926239
pH 3_a	FPeSAA	perfluoroAlkaneSulfonamidoAcetic Acid	121.305	8264.83	8674.85	0.952735
pH 3_b	FPeSAA	perfluoroAlkaneSulfonamidoAcetic Acid	214.097	8648.4	8440.5	1.02463
pH 7_a	FPeSAA	perfluoroAlkaneSulfonamidoAcetic Acid	196.229	1555.09	8447.11	0.184097
pH 7_b	FPeSAA	perfluoroAlkaneSulfonamidoAcetic Acid	146.115	1547.47	8407.27	0.184063
pH 10 Na_a	FPeSAA	perfluoroAlkaneSulfonamidoAcetic Acid	163.002	5581.91	8553.4	0.652596
pH 10 Na_b	FPeSAA	perfluoroAlkaneSulfonamidoAcetic Acid	166.747	5958.24	8520.37	0.699294
pH 3_a	FHxSAA	perfluoroAlkaneSulfonamidoAcetic Acid	121.305	64243.5	48604.7	1.32176
pH 3_b	FHxSAA	perfluoroAlkaneSulfonamidoAcetic Acid	214.097	58360.8	47291.7	1.23406
pH 7_a	FHxSAA	perfluoroAlkaneSulfonamidoAcetic Acid	196.229	10595.9	47328.7	0.223878
pH 7_b	FHxSAA	perfluoroAlkaneSulfonamidoAcetic Acid	146.115	9603.39	47105.5	0.20387
pH 10 Na_a	FHxSAA	perfluoroAlkaneSulfonamidoAcetic Acid	163.002	43669.3	47924.2	0.911215
pH 10 Na_b	FHxSAA	perfluoroAlkaneSulfonamidoAcetic Acid	166.747	48756.1	47739.1	1.0213
pH 3_a	FOSAA	perfluoroAlkaneSulfonamidoAcetic Acid	121.305	0	195.751	0
pH 3_b	FOSAA	perfluoroAlkaneSulfonamidoAcetic Acid	214.097	0	190.463	0
pH 7_a	FOSAA	perfluoroAlkaneSulfonamidoAcetic Acid	196.229	314.48	190.612	1.64985
pH 7_b	FOSAA	perfluoroAlkaneSulfonamidoAcetic Acid	146.115	258.28	189.713	1.36142
pH 10 Na_a	FOSAA	perfluoroAlkaneSulfonamidoAcetic Acid	163.002	0	193.01	0
pH 10 Na_b	FOSAA	perfluoroAlkaneSulfonamidoAcetic Acid	166.747	0	192.265	0
pH 3_a	PFBA	perfluoro-n-alkanoic acid	121.305	13724.4	20358.1	0.674147
pH 3_b	PFBA	perfluoro-n-alkanoic acid	214.097	21210.2	19808.2	1.07078
pH 7_a	PFBA	perfluoro-n-alkanoic acid	196.229	17983.1	19823.7	0.907155
pH 7_b	PFBA	perfluoro-n-alkanoic acid	146.115	35909.7	19730.2	1.82004
pH 10 Na_a	PFBA	perfluoro-n-alkanoic acid	163.002	4306.59	20073.1	0.214545
pH 10 Na_b	PFBA	perfluoro-n-alkanoic acid	166.747	21621.8	19995.6	1.08133
pH 3_a	PFPeA	perfluoro-n-alkanoic acid	121.305	13156.6	10569.7	1.24474
pH 3_b	PFPeA	perfluoro-n-alkanoic acid	214.097	13442.9	10284.2	1.30714
pH 7_a	PFPeA	perfluoro-n-alkanoic acid	196.229	8138.77	10292.2	0.790768
pH 7_b	PFPeA	perfluoro-n-alkanoic acid	146.115	8297.86	10243.7	0.810045
pH 10 Na_a	PFPeA	perfluoro-n-alkanoic acid	163.002	5607.7	10421.8	0.538077
pH 10 Na_b	PFPeA	perfluoro-n-alkanoic acid	166.747	17343.7	10381.5	1.67063
pH 3_a	PFHxA	perfluoro-n-alkanoic acid	121.305	28445.2	31164.7	0.912738
pH 3_b	PFHxA	perfluoro-n-alkanoic acid	214.097	33844.3	30322.8	1.11614
pH 7_a	PFHxA	perfluoro-n-alkanoic acid	196.229	25656.7	30346.5	0.845458
pH 7_b	PFHxA	perfluoro-n-alkanoic acid	146.115	24851.6	30203.4	0.822808
pH 10 Na_a	PFHxA	perfluoro-n-alkanoic acid	163.002	22016.6	30728.4	0.716492
pH 10 Na_b	PFHxA	perfluoro-n-alkanoic acid	166.747	32063.6	30609.7	1.0475
pH 3_a	PFHpA	perfluoro-n-alkanoic acid	121.305	1209.45	1378.48	0.877382
pH 3_b	PFHpA	perfluoro-n-alkanoic acid	214.097	1351.33	1341.24	1.00752
pH 7_a	PFHpA	perfluoro-n-alkanoic acid	196.229	683.897	1342.29	0.5095
pH 7_b	PFHpA	perfluoro-n-alkanoic acid	146.115	627.113	1335.96	0.469409
pH 10 Na_a	PFHpA	perfluoro-n-alkanoic acid	163.002	1103.67	1359.18	0.812007
pH 10 Na_b	PFHpA	perfluoro-n-alkanoic acid	166.747	1315.22	1353.93	0.971406
pH 3_a	PFOA	perfluoro-n-alkanoic acid	121.305	3273.21	2721.16	1.20287
pH 3_b	PFOA	perfluoro-n-alkanoic acid	214.097	3603.55	2647.65	1.36104
pH 7_a	PFOA	perfluoro-n-alkanoic acid	196.229	2545.91	2649.72	0.960822
pH 7_b	PFOA	perfluoro-n-alkanoic acid	146.115	2287.84	2637.22	0.867516
pH 10 Na_a	PFOA	perfluoro-n-alkanoic acid	163.002	3676.31	2683.06	1.37019
pH 10 Na_b	PFOA	perfluoro-n-alkanoic acid	166.747	3496.8	2672.7	1.30834
pH 3_a	PFDA	perfluoro-n-alkanoic acid	121.305	171.489	183.392	0.935097
pH 3_b	PFDA	perfluoro-n-alkanoic acid	214.097	0	178.438	0
pH 7_a	PFDA	perfluoro-n-alkanoic acid	196.229	24.28	178.577	0.135964
pH 7_b	PFDA	perfluoro-n-alkanoic acid	146.115	6.1934	177.735	0.0348462
pH 10 Na_a	PFDA	perfluoro-n-alkanoic acid	163.002	0	180.824	0
pH 10 Na_b	PFDA	perfluoro-n-alkanoic acid	166.747	0	180.126	0
pH 3_a	PFDoA	perfluoro-n-alkanoic acid	121.305	0	13.5932	0
pH 3_b	PFDoA	perfluoro-n-alkanoic acid	214.097	0	13.2259	0
pH 7_a	PFDoA	perfluoro-n-alkanoic acid	196.229	2.29337	13.2363	0.173264
pH 7_b	PFDoA	perfluoro-n-alkanoic acid	146.115	0	13.1739	0
pH 10 Na_a	PFDoA	perfluoro-n-alkanoic acid	163.002	0	13.4029	0
pH 10 Na_b	PFDoA	perfluoro-n-alkanoic acid	166.747	0	13.3511	0
pH 3_a	PFTeDA	perfluoro-n-alkanoic acid	121.305	0	331.579	0
pH 3_b	PFTeDA	perfluoro-n-alkanoic acid	214.097	0	322.622	0
pH 7_a	PFTeDA	perfluoro-n-alkanoic acid	196.229	0	322.874	0
pH 7_b	PFTeDA	perfluoro-n-alkanoic acid	146.115	0	321.352	0
pH 10 Na_a	PFTeDA	perfluoro-n-alkanoic acid	163.002	0	326.937	0
pH 10 Na_b	PFTeDA	perfluoro-n-alkanoic acid	166.747	0	325.674	0
pH 3_a	UPFHxS	Unsaturated PerFluoroAlkane Sulfonate	121.305	177.105	315.722	0.560952
pH 3_b	UPFHxS	Unsaturated PerFluoroAlkane Sulfonate	214.097	151.598	307.193	0.493494
pH 7_a	UPFHxS	Unsaturated PerFluoroAlkane Sulfonate	1.63654	127.909	307.433	0.416055
pH 7_b	UPFHxS	Unsaturated PerFluoroAlkane Sulfonate	2.30169	143.509	305.983	0.469011
pH 10 Na_a	UPFHxS	Unsaturated PerFluoroAlkane Sulfonate	163.002	168.532	311.301	0.541378
pH 10 Na_b	UPFHxS	Unsaturated PerFluoroAlkane Sulfonate	166.747	132.999	310.099	0.428892
pH 3_a	UPFHpS	Unsaturated PerFluoroAlkane Sulfonate	121.305	14.9801	55.2119	0.27132
pH 3_b	UPFHpS	Unsaturated PerFluoroAlkane Sulfonate	214.097	9.6391	53.7204	0.179431
pH 7_a	UPFHpS	Unsaturated PerFluoroAlkane Sulfonate	4.02348	43.0535	53.7624	0.800811
pH 7_b	UPFHpS	Unsaturated PerFluoroAlkane Sulfonate	7.30196	85.9546	53.5089	1.60636
pH 10 Na_a	UPFHpS	Unsaturated PerFluoroAlkane Sulfonate	163.002	0	54.4389	0
pH 10 Na_b	UPFHpS	Unsaturated PerFluoroAlkane Sulfonate	166.747	0	54.2287	0
pH 3_a	UPFOS	Unsaturated PerFluoroAlkane Sulfonate	121.305	2705.76	1564.19	1.72981
pH 3_b	UPFOS	Unsaturated PerFluoroAlkane Sulfonate	214.097	1500.24	1521.93	0.985746
pH 7_a	UPFOS	Unsaturated PerFluoroAlkane Sulfonate	162.419	2933.92	1523.12	1.92625
pH 7_b	UPFOS	Unsaturated PerFluoroAlkane Sulfonate	46.3665	3002.99	1515.94	1.98094
pH 10 Na_a	UPFOS	Unsaturated PerFluoroAlkane Sulfonate	163.002	1729.92	1542.29	1.12165
pH 10 Na_b	UPFOS	Unsaturated PerFluoroAlkane Sulfonate	166.747	1361	1536.33	0.885872
pH 3_a	UPFNS	Unsaturated PerFluoroAlkane Sulfonate	121.305	682.099	4741.99	0.143843
pH 3_b	UPFNS	Unsaturated PerFluoroAlkane Sulfonate	214.097	0	4613.88	0
pH 7_a	UPFNS	Unsaturated PerFluoroAlkane Sulfonate	26.4472	718.417	4617.5	0.155586
pH 7_b	UPFNS	Unsaturated PerFluoroAlkane Sulfonate	96.7558	754.447	4595.72	0.164163
pH 10 Na_a	UPFNS	Unsaturated PerFluoroAlkane Sulfonate	163.002	0	4675.6	0
pH 10 Na_b	UPFNS	Unsaturated PerFluoroAlkane Sulfonate	166.747	0	4657.54	0
pH 3_a	UPFDS	Unsaturated PerFluoroAlkane Sulfonate	121.305	1741.67	11792.4	0.147695
pH 3_b	UPFDS	Unsaturated PerFluoroAlkane Sulfonate	214.097	354.352	11473.8	0.0308836
pH 7_a	UPFDS	Unsaturated PerFluoroAlkane Sulfonate	196.229	1227.64	11482.8	0.106912
pH 7_b	UPFDS	Unsaturated PerFluoroAlkane Sulfonate	146.115	1190.07	11428.6	0.10413
pH 10 Na_a	UPFDS	Unsaturated PerFluoroAlkane Sulfonate	163.002	2361.55	11627.3	0.203105
pH 10 Na_b	UPFDS	Unsaturated PerFluoroAlkane Sulfonate	166.747	1186.43	11582.4	0.102434
pH 3_a	4:2 FTS	X:2 FluoroTelomer Sulfonate	121.305	28.6386	343.586	0.0833521
pH 3_b	4:2 FTS	X:2 FluoroTelomer Sulfonate	214.097	20.1175	334.304	0.0601774
pH 7_a	4:2 FTS	X:2 FluoroTelomer Sulfonate	196.229	495.413	334.566	1.48076
pH 7_b	4:2 FTS	X:2 FluoroTelomer Sulfonate	146.115	103.037	332.988	0.309431
pH 10 Na_a	4:2 FTS	X:2 FluoroTelomer Sulfonate	163.002	29.988	338.776	0.0885187
pH 10 Na_b	4:2 FTS	X:2 FluoroTelomer Sulfonate	166.747	48.8205	337.467	0.144667
pH 3_a	6:2 FTS	X:2 FluoroTelomer Sulfonate	121.305	1589.13	1836.41	0.865348
pH 3_b	6:2 FTS	X:2 FluoroTelomer Sulfonate	214.097	1074.07	1786.8	0.601116
pH 7_a	6:2 FTS	X:2 FluoroTelomer Sulfonate	196.229	528.076	1788.2	0.295312
pH 7_b	6:2 FTS	X:2 FluoroTelomer Sulfonate	146.115	492.063	1779.76	0.276477
pH 10 Na_a	6:2 FTS	X:2 FluoroTelomer Sulfonate	163.002	1427.2	1810.7	0.788202
pH 10 Na_b	6:2 FTS	X:2 FluoroTelomer Sulfonate	166.747	1295.25	1803.7	0.718104
pH 3_a	8:2 FTS	X:2 FluoroTelomer Sulfonate	121.305	3359.17	6807.9	0.493423
pH 3_b	8:2 FTS	X:2 FluoroTelomer Sulfonate	214.097	2308.59	6623.99	0.348519
pH 7_a	8:2 FTS	X:2 FluoroTelomer Sulfonate	196.229	2199.79	6629.18	0.331835
pH 7_b	8:2 FTS	X:2 FluoroTelomer Sulfonate	146.115	2135.79	6597.91	0.323707
pH 10 Na_a	8:2 FTS	X:2 FluoroTelomer Sulfonate	163.002	3674.66	6712.59	0.547427
pH 10 Na_b	8:2 FTS	X:2 FluoroTelomer Sulfonate	166.747	2735.92	6686.67	0.409161
pH 3_a	8:2 UFTCA	X:2 unsaturated fluorotelomer carboxylic acid	121.305	0	234.927	0
pH 3_b	8:2 UFTCA	X:2 unsaturated fluorotelomer carboxylic acid	214.097	0	228.58	0
pH 7_a	8:2 UFTCA	X:2 unsaturated fluorotelomer carboxylic acid	196.229	0	228.759	0
pH 7_b	8:2 UFTCA	X:2 unsaturated fluorotelomer carboxylic acid	146.115	2.71914	227.68	0.0119428
pH 10 Na_a	8:2 UFTCA	X:2 unsaturated fluorotelomer carboxylic acid	163.002	0	231.638	0
pH 10 Na_b	8:2 UFTCA	X:2 unsaturated fluorotelomer carboxylic acid	166.747	0	230.743	0
