# Supplementary material for: Effect of geochemical conditions on PFAS release from AFFF-impacted saturated soil columns
Source: Royal Society of Chemistry journal article supplement (doi:10.1039/d2em00367h), 2023-01-01
Supplement: d2em00367h2.xlsx [file d2em00367h2.xlsx]

## Sheet: Sheet1
Column	Analyte	Cumulative mass eluted (mg)
pH 7_a	Al	0.343
pH 7_b	Al	0.263
pH 3_a	Al	0.072
pH 3_b	Al	0.397
pH 10_a	Al	11
pH 10_b	Al	11.1
pH 7_a	As	0.0746
pH 7_b	As	0.00333
pH 3_a	As	0
pH 3_b	As	0
pH 10_a	As	0
pH 10_b	As	0
pH 7_a	B	0.174
pH 7_b	B	0.0736
pH 3_a	B	1.79
pH 3_b	B	3.86
pH 10_a	B	2630
pH 10_b	B	2220
pH 7_a	Ba	0.281
pH 7_b	Ba	0.219
pH 3_a	Ba	0.551
pH 3_b	Ba	0.54
pH 10_a	Ba	0.642
pH 10_b	Ba	0.761
pH 7_a	Ca	76
pH 7_b	Ca	61
pH 3_a	Ca	190
pH 3_b	Ca	169
pH 10_a	Ca	147
pH 10_b	Ca	169
pH 7_a	Cr	8.18e-05
pH 7_b	Cr	4.18e-05
pH 3_a	Cr	0
pH 3_b	Cr	0.000593
pH 10_a	Cr	0
pH 10_b	Cr	0
pH 7_a	Cu	0.0346
pH 7_b	Cu	0.00741
pH 3_a	Cu	0
pH 3_b	Cu	0
pH 10_a	Cu	0
pH 10_b	Cu	0.051
pH 7_a	Fe	6.6
pH 7_b	Fe	7.56
pH 3_a	Fe	28
pH 3_b	Fe	35
pH 10_a	Fe	20.1
pH 10_b	Fe	21.1
pH 7_a	K	41.7
pH 7_b	K	35.2
pH 3_a	K	71.4
pH 3_b	K	44.5
pH 10_a	K	40
pH 10_b	K	36.9
pH 7_a	Li	0
pH 7_b	Li	0
pH 3_a	Li	0.15
pH 3_b	Li	0.278
pH 10_a	Li	0.57
pH 10_b	Li	1.11
pH 7_a	Mg	21.7
pH 7_b	Mg	17.1
pH 3_a	Mg	50
pH 3_b	Mg	39.8
pH 10_a	Mg	29.1
pH 10_b	Mg	37.4
pH 7_a	Mn	5.38
pH 7_b	Mn	4.68
pH 3_a	Mn	16.6
pH 3_b	Mn	13.6
pH 10_a	Mn	2.15
pH 10_b	Mn	4.64
pH 7_a	Na	634
pH 7_b	Na	496
pH 3_a	Na	1010
pH 3_b	Na	1190
pH 10_a	Na	9290
pH 10_b	Na	8370
pH 7_a	Ni	0.00598
pH 7_b	Ni	0.00302
pH 3_a	Ni	0
pH 3_b	Ni	0
pH 10_a	Ni	0.0292
pH 10_b	Ni	0
pH 7_a	P	2.1
pH 7_b	P	1.7
pH 3_a	P	3.39
pH 3_b	P	4.62
pH 10_a	P	14.6
pH 10_b	P	14.8
pH 7_a	Pb	0
pH 7_b	Pb	0
pH 3_a	Pb	0
pH 3_b	Pb	0.037
pH 10_a	Pb	0
pH 10_b	Pb	0
pH 7_a	S	282
pH 7_b	S	207
pH 3_a	S	561
pH 3_b	S	651
pH 10_a	S	502
pH 10_b	S	471
pH 7_a	Se	0
pH 7_b	Se	0.00299
pH 3_a	Se	0
pH 3_b	Se	0
pH 10_a	Se	0
pH 10_b	Se	0.061
pH 7_a	Si	26
pH 7_b	Si	21.6
pH 3_a	Si	56.4
pH 3_b	Si	108
pH 10_a	Si	64
pH 10_b	Si	58.2
pH 7_a	Sr	1.36
pH 7_b	Sr	1.13
pH 3_a	Sr	2.46
pH 3_b	Sr	2.39
pH 10_a	Sr	2.25
pH 10_b	Sr	2.51
pH 7_a	Ti	0.00444
pH 7_b	Ti	0.00572
pH 3_a	Ti	0
pH 3_b	Ti	0
pH 10_a	Ti	0.00923
pH 10_b	Ti	0.0274
pH 7_a	V	0.0134
pH 7_b	V	0.0107
pH 3_a	V	0
pH 3_b	V	0.0307
pH 10_a	V	0.0923
pH 10_b	V	0.181
pH 7_a	Zn	0.0108
pH 7_b	Zn	0.00497
pH 3_a	Zn	0.00483
pH 3_b	Zn	0.00551
pH 10_a	Zn	0.0195
pH 10_b	Zn	0.0493
