# Supplementary material for: Effect of geochemical conditions on PFAS release from AFFF-impacted saturated soil columns
Source: Royal Society of Chemistry journal article supplement (doi:10.1039/d2em00367h), 2023-01-01
Supplement: d2em00367h3.xlsx [file d2em00367h3.xlsx]

## Sheet: Sheet1
Analyte	concentration (ng/g)	class	target
AmPr-FBSA	689±212	AmPr-FASA	no
AmPr-FEtSA	20.4±4.76	AmPr-FASA	no
AmPr-FHxSA	282±95.4	AmPr-FASA	no
AmPr-FPeSA	272±104	AmPr-FASA	no
AmPr-FPrSA	592±174	AmPr-FASA	no
AmPr-FBSA-PrA	325±90.7	AmPr-FASA-PrA	no
AmPr-FHxSA-PrA	123±38.9	AmPr-FASA-PrA	no
AmPr-FPeSA-PrA	130±29.5	AmPr-FASA-PrA	no
AmPr-FPrSA-PrA	67.5±13.2	AmPr-FASA-PrA	no
PFEtCHxS	3.1±0.545	CHxS	yes
Cl-PFBS	0.0486±0.00878	Cl-PFAS	no
Cl-PFHxS	0.308±0.0585	Cl-PFAS	no
Cl-PFPeS	0.0937±0.022	Cl-PFAS	no
Cl-PFPrS	0.0307±0.00266	Cl-PFAS	no
Cl-PFOS	228±0.0335	Cl-PFAS	yes
CMeAmPr-FBSA	198±20.9	CMeAmPr-FASA	no
CMeAmPr-FHxSA	553±112	CMeAmPr-FASA	no
CMeAmPr-FPeSA	301±56.4	CMeAmPr-FASA	no
CMeAmPr-FPrSA	24.2±5.08	CMeAmPr-FASA	no
EtFHxSA	4.07±0.727	EtFASA	no
EtFOSAA	1.28±0.000276	EtFASAA	yes
F5S-PFHpS	19.8±4.67	F5S-PFAS	no
F5S-PFHxS	4.54±0.774	F5S-PFAS	no
F5S-PFNS	6.8±2.32	F5S-PFAS	no
F5S-PFOS	55.4±17.5	F5S-PFAS	no
FBSA	185±185	FASA	no
FHpSA	20.2±17.4	FASA	no
FHxSA	1840±1310	FASA	no
FPeSA	356±289	FASA	no
FPrSA	73.9±76.9	FASA	no
FOSA	15.7±0.00316	FASA	yes
FBSAA	16±5.14	FASAA	no
FHxSAA	110±12	FASAA	no
FPeSAA	19.7±4.56	FASAA	no
FPrSAA	5.92±2.55	FASAA	no
FOSAA	0.445±0.0000852	FASAA	yes
H-PFBS	0.313±0.0381	H-PFAS	no
H-PFDS	5.09±1.24	H-PFAS	no
H-PFHpS	0.335±0.0486	H-PFAS	no
H-PFHxS	0.755±0.0896	H-PFAS	no
H-PFOS	41.5±11.2	H-PFAS	no
H-PFPeS	0.241±0.0789	H-PFAS	no
H-PFPrS	0.272±0.0353	H-PFAS	no
K-PFBS	0.0594±0.0163	K-PFAS	no
K-PFDS	2.73±1.08	K-PFAS	no
K-PFHpS	0.121±0.022	K-PFAS	no
K-PFHxS	0.97±0.202	K-PFAS	no
K-PFNS	5.88±1.51	K-PFAS	no
K-PFOS	1.7±0.229	K-PFAS	no
K-PFPeS	0.186±0.0211	K-PFAS	no
MeFBSA	9.17±1.62	MeFASA	no
MeFHxSA	115±17.3	MeFASA	no
MeFPeSA	33.3±6.29	MeFASA	no
MeFPrSA	0.58±0.125	MeFASA	no
MeFOSA	0.575±0.000154	MeFASA	yes
MeFBSAA	109±7.21	MeFASAA	no
MeFHpSAA	3.46±0.725	MeFASAA	no
MeFHxSAA	325±32.9	MeFASAA	no
MeFPeSAA	84±3.16	MeFASAA	no
MeFOSAA	10.6±0.000934	MeFASAA	yes
O-PFDS	18.2±5.11	O-PFAS	no
O-PFHpS	0.24±0.0284	O-PFAS	no
O-PFHxS	0.225±0.0294	O-PFAS	no
O-PFOS	0.168±0.032	O-PFAS	no
OAmPr-FBSA	35.2±5.49	OAmPr-FASA	no
OAmPr-FHxSA	21.9±2.45	OAmPr-FASA	no
OAmPr-FPeSA	17±2.09	OAmPr-FASA	no
OAmPr-FPrSA	24±5.02	OAmPr-FASA	no
PFPrS	28.7±0.00406	PFSA	yes
PFBS	29.4±0.00468	PFSA	yes
PFPeS	66.4±0.0136	PFSA	yes
PFHxS	188±0.0257	PFSA	yes
PFHpS	10.6±0.00139	PFSA	yes
PFOS	8580±1.34	PFSA	yes
PFNS	235±0.0664	PFSA	yes
PFDS	11.5±0.00422	PFSA	yes
PFDoS	0.75±0.000256	PFSA	yes
PFBSi	0.506±0.101	PFASi	no
PFHxSi	7.92±1.54	PFASi	no
PFOSi	22.7±11	PFASi	no
PFPeSi	1.35±0.275	PFASi	no
PFPrSi	0.252±0.0251	PFASi	no
PFBA	46.2±0.00783	PFCA	yes
PFPeA	24±0.00415	PFCA	yes
PFHxA	70.8±0.0138	PFCA	yes
PFHpA	3.13±0.00037	PFCA	yes
PFOA	6.18±0.000858	PFCA	yes
PFDA	0.417±0.000128	PFCA	yes
PFDoA	0.0309±0.0000219	PFCA	yes
PFTeDA	0.753±0.0000382	PFCA	yes
SPrAmPr-FHxSA	153±33.5	SPrAmPr-FASA	no
UPFDoS	1.06±0.357	UPFAS	no
UPFDS	26.8±6.52	UPFAS	no
UPFHpS	0.125±0.0347	UPFAS	no
UPFHxS	0.717±0.162	UPFAS	no
UPFNS	10.8±1.75	UPFAS	no
UPFOS	3.55±0.633	UPFAS	no
UPFUdS	5.97±1.94	UPFAS	no
4:2 FTS	0.781±0.000172	X:2 FTS	yes
6:2 FTS	4.17±0.000722	X:2 FTS	yes
8:2 FTS	15.5±0.00297	X:2 FTS	yes
8:2 UFTCA	0.534±0.0000784	X:2 UFTCA	yes
10:2 UFTCA	0.729±0.0000682	X:2 UFTCA	yes
