# Supplementary material for: Effect of geochemical conditions on PFAS release from AFFF-impacted saturated soil columns
Source: Royal Society of Chemistry journal article supplement (doi:10.1039/d2em00367h), 2023-01-01
Supplement: d2em00367h4.xlsx [file d2em00367h4.xlsx]

## Sheet: 2022-05-23 summary max cum mass
Column	Analyte	Class	pv	cumulative mass eluted (ng)	fraction soil mass eluted
pH 10 Ca_a	4:2 FTS	X:2 FluoroTelomer Sulfonate	2.9	0	0
pH 10 Ca_b	4:2 FTS	X:2 FluoroTelomer Sulfonate	67.646	49.9784	0.146505
pH 10 Ca_a	5:3 FTCA	X:3 fluorotelomer carboxylic acid	2.9	13.1131	NA
pH 10 Ca_b	5:3 FTCA	X:3 fluorotelomer carboxylic acid	67.646	1920.19	NA
pH 10 Ca_a	6:2 FTS	X:2 FluoroTelomer Sulfonate	2.9	541.674	0.295606
pH 10 Ca_b	6:2 FTS	X:2 FluoroTelomer Sulfonate	67.646	1269.62	0.696323
pH 10 Ca_a	7:1 PFOS	X:1 PerFluoroAlkaneSulfonate	4.99	0	NA
pH 10 Ca_b	7:1 PFOS	X:1 PerFluoroAlkaneSulfonate	67.646	131.964	NA
pH 10 Ca_a	8:2 FTS	X:2 FluoroTelomer Sulfonate	2.9	17.5328	0.00258097
pH 10 Ca_b	8:2 FTS	X:2 FluoroTelomer Sulfonate	67.646	1087	0.160814
pH 10 Ca_a	AmPr-FBSA	N-dimethyl ammonio propyl perfluoroalkane sulfonamide	4.99	15301.1	0.0505391
pH 10 Ca_b	AmPr-FBSA	N-dimethyl ammonio propyl perfluoroalkane sulfonamide	67.646	66014.5	0.219132
pH 10 Ca_a	AmPr-FBSA-PrA	N-dimethyl ammonio propyl perfluoralkane sulfonamido propanoic acid	4.99	15336	0.107546
pH 10 Ca_b	AmPr-FBSA-PrA	N-dimethyl ammonio propyl perfluoralkane sulfonamido propanoic acid	67.646	57136.1	0.402675
pH 10 Ca_a	AmPr-FEtSA	N-dimethyl ammonio propyl perfluoroalkane sulfonamide	4.99	406.38	0.0453033
pH 10 Ca_b	AmPr-FEtSA	N-dimethyl ammonio propyl perfluoroalkane sulfonamide	67.646	567.088	0.0635343
pH 10 Ca_a	AmPr-FHxSA	N-dimethyl ammonio propyl perfluoroalkane sulfonamide	4.99	8196.93	0.0662506
pH 10 Ca_b	AmPr-FHxSA	N-dimethyl ammonio propyl perfluoroalkane sulfonamide	67.646	44010.4	0.357482
pH 10 Ca_a	AmPr-FHxSA-PrA	N-dimethyl ammonio propyl perfluoralkane sulfonamido propanoic acid	4.99	4288.92	0.0793234
pH 10 Ca_b	AmPr-FHxSA-PrA	N-dimethyl ammonio propyl perfluoralkane sulfonamido propanoic acid	67.646	29804.8	0.553986
pH 10 Ca_a	AmPr-FPeSA	N-dimethyl ammonio propyl perfluoroalkane sulfonamide	4.99	5448.8	0.0456135
pH 10 Ca_b	AmPr-FPeSA	N-dimethyl ammonio propyl perfluoroalkane sulfonamide	67.646	23478.2	0.197523
pH 10 Ca_a	AmPr-FPeSA-PrA	N-dimethyl ammonio propyl perfluoralkane sulfonamido propanoic acid	4.99	5867.82	0.102894
pH 10 Ca_b	AmPr-FPeSA-PrA	N-dimethyl ammonio propyl perfluoralkane sulfonamido propanoic acid	67.646	29669.3	0.522855
pH 10 Ca_a	AmPr-FPrSA	N-dimethyl ammonio propyl perfluoroalkane sulfonamide	4.99	20142.1	0.0774786
pH 10 Ca_b	AmPr-FPrSA	N-dimethyl ammonio propyl perfluoroalkane sulfonamide	67.646	54476.7	0.210595
pH 10 Ca_a	AmPr-FPrSA-PrA	N-dimethyl ammonio propyl perfluoralkane sulfonamido propanoic acid	4.99	8449.76	0.284916
pH 10 Ca_b	AmPr-FPrSA-PrA	N-dimethyl ammonio propyl perfluoralkane sulfonamido propanoic acid	67.646	15804.4	0.535563
pH 10 Ca_a	Cl-PFBS	Chloro-PerFluoroAlkaneSulfonate	4.99	25.9077	1.21456
pH 10 Ca_b	Cl-PFBS	Chloro-PerFluoroAlkaneSulfonate	67.646	41.2736	1.94457
pH 10 Ca_a	Cl-PFHxS	Chloro-PerFluoroAlkaneSulfonate	4.99	0	0
pH 10 Ca_b	Cl-PFHxS	Chloro-PerFluoroAlkaneSulfonate	67.646	21.4085	0.159091
pH 10 Ca_a	Cl-PFOS	Chloro-PerFluoroAlkaneSulfonate	2.9	1361.47	0.0135844
pH 10 Ca_b	Cl-PFOS	Chloro-PerFluoroAlkaneSulfonate	67.646	40256.4	0.403671
pH 10 Ca_a	Cl-PFPeS	Chloro-PerFluoroAlkaneSulfonate	4.99	2.215	0.0538127
pH 10 Ca_b	Cl-PFPeS	Chloro-PerFluoroAlkaneSulfonate	67.646	16.2985	0.397942
pH 10 Ca_a	Cl-PFPrS	Chloro-PerFluoroAlkaneSulfonate	4.99	0	0
pH 10 Ca_b	Cl-PFPrS	Chloro-PerFluoroAlkaneSulfonate	67.646	19.7234	1.47022
pH 10 Ca_a	CMeAmPr-FBSA	N-CarboxyMethyldimethylAmmonioPropyl- perFluoroAlkaneSulfonamide	4.99	8800.92	0.101307
pH 10 Ca_b	CMeAmPr-FBSA	N-CarboxyMethyldimethylAmmonioPropyl- perFluoroAlkaneSulfonamide	67.646	20349	0.235405
pH 10 Ca_a	CMeAmPr-FBSAPrA	N-CarboxyMethyldimethylAmmonioPropyl-perFluoroAlkaneSulfonamido Propanoic acid	4.99	0	NA
pH 10 Ca_b	CMeAmPr-FBSAPrA	N-CarboxyMethyldimethylAmmonioPropyl-perFluoroAlkaneSulfonamido Propanoic acid	67.646	56.7923	NA
pH 10 Ca_a	CMeAmPr-FHxSA	N-CarboxyMethyldimethylAmmonioPropyl- perFluoroAlkaneSulfonamide	4.99	7132.52	0.0293689
pH 10 Ca_b	CMeAmPr-FHxSA	N-CarboxyMethyldimethylAmmonioPropyl- perFluoroAlkaneSulfonamide	67.646	48832.6	0.202076
pH 10 Ca_a	CMeAmPr-FHxSAPrA	N-CarboxyMethyldimethylAmmonioPropyl-perFluoroAlkaneSulfonamido Propanoic acid	4.99	597.491	NA
pH 10 Ca_b	CMeAmPr-FHxSAPrA	N-CarboxyMethyldimethylAmmonioPropyl-perFluoroAlkaneSulfonamido Propanoic acid	67.646	3509.08	NA
pH 10 Ca_a	CMeAmPr-FPeSA	N-CarboxyMethyldimethylAmmonioPropyl- perFluoroAlkaneSulfonamide	4.99	5662.28	0.0428831
pH 10 Ca_b	CMeAmPr-FPeSA	N-CarboxyMethyldimethylAmmonioPropyl- perFluoroAlkaneSulfonamide	67.646	27908.8	0.21242
pH 10 Ca_a	CMeAmPr-FPrSA	N-CarboxyMethyldimethylAmmonioPropyl- perFluoroAlkaneSulfonamide	4.99	1688.13	0.158523
pH 10 Ca_b	CMeAmPr-FPrSA	N-CarboxyMethyldimethylAmmonioPropyl- perFluoroAlkaneSulfonamide	67.646	2592.33	0.244644
pH 10 Ca_a	FBSA	perFluoroAlkane SulfonAmide	4.99	94945.8	1.1696
pH 10 Ca_b	FBSA	perFluoroAlkane SulfonAmide	67.646	130374	1.61405
pH 10 Ca_a	FBSAA	perfluoroAlkaneSulfonamidoAcetic Acid	4.99	6043.75	0.861631
pH 10 Ca_b	FBSAA	perfluoroAlkaneSulfonamidoAcetic Acid	67.646	5533.63	0.792839
pH 10 Ca_a	FEtSA	perFluoroAlkane SulfonAmide	4.99	0	NA
pH 10 Ca_b	FEtSA	perFluoroAlkane SulfonAmide	67.646	788.373	NA
pH 10 Ca_a	FEtSAA	perfluoroAlkaneSulfonamidoAcetic Acid	4.99	351.193	NA
pH 10 Ca_b	FEtSAA	perfluoroAlkaneSulfonamidoAcetic Acid	67.646	282.902	NA
pH 10 Ca_a	FHpSA	perFluoroAlkane SulfonAmide	4.99	4447.25	0.502402
pH 10 Ca_b	FHpSA	perFluoroAlkane SulfonAmide	67.646	24158.8	2.7428
pH 10 Ca_a	FHxSA	perFluoroAlkane SulfonAmide	4.99	477663	0.592497
pH 10 Ca_b	FHxSA	perFluoroAlkane SulfonAmide	67.646	2.46478e+06	3.07258
pH 10 Ca_a	FHxSAA	perfluoroAlkaneSulfonamidoAcetic Acid	4.99	10184.5	0.209994
pH 10 Ca_b	FHxSAA	perfluoroAlkaneSulfonamidoAcetic Acid	67.646	49641.4	1.02866
pH 10 Ca_a	FOSA	perFluoroAlkane SulfonAmide	2.9	0	0
pH 10 Ca_b	FOSA	perFluoroAlkane SulfonAmide	67.646	16459.5	2.39208
pH 10 Ca_a	FPeSA	perFluoroAlkane SulfonAmide	4.99	102691	0.657019
pH 10 Ca_b	FPeSA	perFluoroAlkane SulfonAmide	67.646	260633	1.67585
pH 10 Ca_a	FPeSAA	perfluoroAlkaneSulfonamidoAcetic Acid	4.99	3976.46	0.459388
pH 10 Ca_b	FPeSAA	perfluoroAlkaneSulfonamidoAcetic Acid	67.646	5716.86	0.663743
pH 10 Ca_a	FPrSA	perFluoroAlkane SulfonAmide	4.99	35141.4	1.08203
pH 10 Ca_b	FPrSA	perFluoroAlkane SulfonAmide	67.646	37858.7	1.1715
pH 10 Ca_a	FPrSAA	perfluoroAlkaneSulfonamidoAcetic Acid	4.99	3899.89	1.50101
pH 10 Ca_b	FPrSAA	perfluoroAlkaneSulfonamidoAcetic Acid	67.646	3419.15	1.32254
pH 10 Ca_a	H-PFBS	Hydrido-PerFluoroAlkane Sulfonate	4.99	124.059	0.903816
pH 10 Ca_b	H-PFBS	Hydrido-PerFluoroAlkane Sulfonate	67.646	126.803	0.92841
pH 10 Ca_a	H-PFHxA	Hydrido-PerFluoroAlkanoic Acid	4.99	181.417	NA
pH 10 Ca_b	H-PFHxA	Hydrido-PerFluoroAlkanoic Acid	67.646	0	NA
pH 10 Ca_a	H-PFOS	Hydrido-PerFluoroAlkane Sulfonate	4.99	524.769	0.028824
pH 10 Ca_b	H-PFOS	Hydrido-PerFluoroAlkane Sulfonate	67.646	2665.38	0.147131
pH 10 Ca_a	H-PFPeA	Hydrido-PerFluoroAlkanoic Acid	4.99	378.303	NA
pH 10 Ca_b	H-PFPeA	Hydrido-PerFluoroAlkanoic Acid	67.646	256.61	NA
pH 10 Ca_a	H-PFPrS	Hydrido-PerFluoroAlkane Sulfonate	4.99	257.74	2.15491
pH 10 Ca_b	H-PFPrS	Hydrido-PerFluoroAlkane Sulfonate	67.646	257.393	2.16274
pH 10 Ca_a	H-UPFOS	Hydrido-Unsaturated PerFluoroAlkane Sulfonate	4.99	27.6076	NA
pH 10 Ca_b	H-UPFOS	Hydrido-Unsaturated PerFluoroAlkane Sulfonate	67.646	199.937	NA
pH 10 Ca_a	K-PFBS	Keto-PerFluoroAlkaneSulfonate	4.99	37.2826	1.42972
pH 10 Ca_b	K-PFBS	Keto-PerFluoroAlkaneSulfonate	67.646	36.6917	1.41407
pH 10 Ca_a	K-PFHxS	Keto-PerFluoroAlkaneSulfonate	4.99	205.492	0.482423
pH 10 Ca_b	K-PFHxS	Keto-PerFluoroAlkaneSulfonate	67.646	296.162	0.698752
pH 10 Ca_a	K-PFOS	Keto-PerFluoroAlkaneSulfonate	4.99	88.5309	0.118799
pH 10 Ca_b	K-PFOS	Keto-PerFluoroAlkaneSulfonate	67.646	605.721	0.816864
pH 10 Ca_a	K-PFPeS	Keto-PerFluoroAlkaneSulfonate	4.99	107.214	1.31519
pH 10 Ca_b	K-PFPeS	Keto-PerFluoroAlkaneSulfonate	67.646	104.74	1.29125
pH 10 Ca_a	MeFBSA	N-methyl perfluoroalkane sulfonamide	4.99	361.826	0.0897918
pH 10 Ca_b	MeFBSA	N-methyl perfluoroalkane sulfonamide	67.646	868.063	0.216495
pH 10 Ca_a	MeFBSAA	N-MethylperFluoroAlkaneSulfonamidoAcetic Acid	4.99	13084.8	0.272301
pH 10 Ca_b	MeFBSAA	N-MethylperFluoroAlkaneSulfonamidoAcetic Acid	67.646	19143.9	0.400378
pH 10 Ca_a	MeFEtSAA	N-MethylperFluoroAlkaneSulfonamidoAcetic Acid	4.99	166.719	NA
pH 10 Ca_b	MeFEtSAA	N-MethylperFluoroAlkaneSulfonamidoAcetic Acid	67.646	164.449	NA
pH 10 Ca_a	MeFHxSA	N-methyl perfluoroalkane sulfonamide	4.99	2017.59	0.0398888
pH 10 Ca_b	MeFHxSA	N-methyl perfluoroalkane sulfonamide	67.646	22088.6	0.438881
pH 10 Ca_a	MeFHxSAA	N-MethylperFluoroAlkaneSulfonamidoAcetic Acid	4.99	10480.7	0.0734203
pH 10 Ca_b	MeFHxSAA	N-MethylperFluoroAlkaneSulfonamidoAcetic Acid	67.646	120186	0.846132
pH 10 Ca_a	MeFOSAA	N-MethylperFluoroAlkaneSulfonamidoAcetic Acid	2.9	0	0
pH 10 Ca_b	MeFOSAA	N-MethylperFluoroAlkaneSulfonamidoAcetic Acid	67.646	8306.46	1.78924
pH 10 Ca_a	MeFPeSA	N-methyl perfluoroalkane sulfonamide	4.99	774.144	0.0529629
pH 10 Ca_b	MeFPeSA	N-methyl perfluoroalkane sulfonamide	67.646	2858.32	0.196527
pH 10 Ca_a	MeFPeSAA	N-MethylperFluoroAlkaneSulfonamidoAcetic Acid	4.99	4594.47	0.124528
pH 10 Ca_b	MeFPeSAA	N-MethylperFluoroAlkaneSulfonamidoAcetic Acid	67.646	19019	0.518059
pH 10 Ca_a	MeFPrAA	N-MethylperFluoroAlkaneSulfonamidoAcetic Acid	4.99	3942.87	NA
pH 10 Ca_b	MeFPrAA	N-MethylperFluoroAlkaneSulfonamidoAcetic Acid	67.646	3867.32	NA
pH 10 Ca_a	MeFPrSA	N-methyl perfluoroalkane sulfonamide	4.99	0	0
pH 10 Ca_b	MeFPrSA	N-methyl perfluoroalkane sulfonamide	67.646	31.8163	0.125588
pH 10 Ca_a	O-PFBS	Oxa-PerFluoroAlkaneSulfonate	4.99	31.6766	NA
pH 10 Ca_b	O-PFBS	Oxa-PerFluoroAlkaneSulfonate	67.646	39.1943	NA
pH 10 Ca_a	O-PFHpS	Oxa-PerFluoroAlkaneSulfonate	4.99	0	0
pH 10 Ca_b	O-PFHpS	Oxa-PerFluoroAlkaneSulfonate	67.646	10.504	0.100236
pH 10 Ca_a	O-PFHxS	Oxa-PerFluoroAlkaneSulfonate	4.99	41.4556	0.419981
pH 10 Ca_b	O-PFHxS	Oxa-PerFluoroAlkaneSulfonate	67.646	72.5242	0.738396
pH 10 Ca_a	O-PFPeS	Oxa-PerFluoroAlkaneSulfonate	4.99	0	NA
pH 10 Ca_b	O-PFPeS	Oxa-PerFluoroAlkaneSulfonate	67.646	138.651	NA
pH 10 Ca_a	PFBA	perfluoro-n-alkanoic acid	2.9	27951	1.37595
pH 10 Ca_b	PFBA	perfluoro-n-alkanoic acid	67.646	12094.6	0.598353
pH 10 Ca_a	PFBS	Perfluoroalkane sulfonate	2.9	23843.5	1.84955
pH 10 Ca_b	PFBS	Perfluoroalkane sulfonate	67.646	19971.6	1.55693
pH 10 Ca_a	PFBSi	PerFluoroAlkaneSulfinate	4.99	157.892	0.710416
pH 10 Ca_b	PFBSi	PerFluoroAlkaneSulfinate	67.646	401.909	1.81736
pH 10 Ca_a	PFEtCHxS	cyclohexane sulfonate	2.9	421.623	0.309545
pH 10 Ca_b	PFEtCHxS	cyclohexane sulfonate	67.646	2901.59	2.1409
pH 10 Ca_a	PFEtS	Perfluoroalkane sulfonate	4.99	0	NA
pH 10 Ca_b	PFEtS	Perfluoroalkane sulfonate	67.646	31.4506	NA
pH 10 Ca_a	PFHpA	perfluoro-n-alkanoic acid	2.9	991.447	0.720798
pH 10 Ca_b	PFHpA	perfluoro-n-alkanoic acid	67.646	1162.01	0.849013
pH 10 Ca_a	PFHpS	Perfluoroalkane sulfonate	2.9	1262.01	0.270651
pH 10 Ca_b	PFHpS	Perfluoroalkane sulfonate	67.646	7361.63	1.58665
pH 10 Ca_a	PFHxA	perfluoro-n-alkanoic acid	2.9	27839.2	0.895238
pH 10 Ca_b	PFHxA	perfluoro-n-alkanoic acid	67.646	25579.1	0.826661
pH 10 Ca_a	PFHxS	Perfluoroalkane sulfonate	2.9	54207.2	0.656891
pH 10 Ca_b	PFHxS	Perfluoroalkane sulfonate	67.646	101542	1.23664
pH 10 Ca_a	PFHxSi	PerFluoroAlkaneSulfinate	4.99	78.9556	0.0227047
pH 10 Ca_b	PFHxSi	PerFluoroAlkaneSulfinate	67.646	2995	0.865546
pH 10 Ca_a	PFNA	perfluoro-n-alkanoic acid	2.9	0	NA
pH 10 Ca_b	PFNA	perfluoro-n-alkanoic acid	67.646	8.29227	NA
pH 10 Ca_a	PFNS	Perfluoroalkane sulfonate	2.9	155.527	0.00150774
pH 10 Ca_b	PFNS	Perfluoroalkane sulfonate	67.646	8929.51	0.0869974
pH 10 Ca_a	PFOA	perfluoro-n-alkanoic acid	2.9	1509.78	0.556038
pH 10 Ca_b	PFOA	perfluoro-n-alkanoic acid	67.646	3284.9	1.21583
pH 10 Ca_a	PFOS	Perfluoroalkane sulfonate	2.9	113758	0.0301764
pH 10 Ca_b	PFOS	Perfluoroalkane sulfonate	67.646	3.08594e+06	0.822684
pH 10 Ca_a	PFPeA	perfluoro-n-alkanoic acid	2.9	15950.5	1.51236
pH 10 Ca_b	PFPeA	perfluoro-n-alkanoic acid	67.646	12974.9	1.23636
pH 10 Ca_a	PFPeS	Perfluoroalkane sulfonate	2.9	21653.2	0.742257
pH 10 Ca_b	PFPeS	Perfluoroalkane sulfonate	67.646	23416.4	0.806699
pH 10 Ca_a	PFPeSi	PerFluoroAlkaneSulfinate	4.99	154.78	0.261524
pH 10 Ca_b	PFPeSi	PerFluoroAlkaneSulfinate	67.646	515.916	0.876061
pH 10 Ca_a	PFPrS	Perfluoroalkane sulfonate	2.9	15281.1	1.21104
pH 10 Ca_b	PFPrS	Perfluoroalkane sulfonate	67.646	11530.5	0.91836
pH 10 Ca_a	PFPrSi	PerFluoroAlkaneSulfinate	4.99	35.4075	0.320116
pH 10 Ca_b	PFPrSi	PerFluoroAlkaneSulfinate	67.646	116.019	1.05415
pH 10 Ca_a	SPrAmPr-FHxSA	N-Sulfo Propyl dimethyl Ammonio Propyl perFluoroAlkaneSulfonamide	4.99	4002.03	0.0596519
pH 10 Ca_b	SPrAmPr-FHxSA	N-Sulfo Propyl dimethyl Ammonio Propyl perFluoroAlkaneSulfonamide	67.646	21232.7	0.31806
pH 10 Ca_a	UPFDS	Unsaturated PerFluoroAlkane Sulfonate	4.99	91.4028	0.00776789
pH 10 Ca_b	UPFDS	Unsaturated PerFluoroAlkane Sulfonate	67.646	260.672	0.0222637
pH 10 Ca_a	UPFHxS	Unsaturated PerFluoroAlkane Sulfonate	4.99	150.993	0.479288
pH 10 Ca_b	UPFHxS	Unsaturated PerFluoroAlkane Sulfonate	67.646	89.957	0.286969
pH 10 Ca_a	UPFOS	Unsaturated PerFluoroAlkane Sulfonate	4.99	221.782	0.142096
pH 10 Ca_b	UPFOS	Unsaturated PerFluoroAlkane Sulfonate	67.646	1454.9	0.936803
