# Supplementary material for: Effect of geochemical conditions on PFAS release from AFFF-impacted saturated soil columns
Source: Royal Society of Chemistry journal article supplement (doi:10.1039/d2em00367h), 2023-01-01
Supplement: d2em00367h6.xlsx [file d2em00367h6.xlsx]

## Sheet: Sheet1
column	pore volumes	measurement	units	value
pH 7_b	0.183646	a254	cm-1	2.27923
pH 7_b	0.786616	a254	cm-1	1.48379
pH 7_b	1.08453	a254	cm-1	1.26272
pH 7_b	1.38448	a254	cm-1	1.1119
pH 7_b	2.00582	a254	cm-1	0.981218
pH 7_b	2.59655	a254	cm-1	0.926822
pH 7_b	3.20258	a254	cm-1	0.915834
pH 7_b	3.49641	a254	cm-1	0.92385
pH 7_b	4.4024	a254	cm-1	0.908396
pH 7_b	6.11234	a254	cm-1	1.20745
pH 7_b	6.70613	a254	cm-1	1.13587
pH 7_b	0.183646	e2e3	unit	7.60772
pH 7_b	0.786616	e2e3	unit	5.85908
pH 7_b	1.08453	e2e3	unit	5.98817
pH 7_b	1.38448	e2e3	unit	5.86363
pH 7_b	2.00582	e2e3	unit	5.50064
pH 7_b	2.59655	e2e3	unit	5.40237
pH 7_b	3.20258	e2e3	unit	5.17113
pH 7_b	3.49641	e2e3	unit	5.10569
pH 7_b	4.4024	e2e3	unit	4.8467
pH 7_b	6.11234	e2e3	unit	4.5478
pH 7_b	6.70613	e2e3	unit	4.50901
pH 7_b	7.59987	a254	cm-1	1.0616
pH 7_b	8.49361	a254	cm-1	1.01673
pH 7_b	9.39246	a254	cm-1	0.956846
pH 7_b	10.8871	a254	cm-1	0.915788
pH 7_b	12.3808	a254	cm-1	0.916624
pH 7_b	13.8806	a254	cm-1	0.919438
pH 7_b	15.3446	a254	cm-1	0.914451
pH 7_b	16.8373	a254	cm-1	0.891059
pH 7_b	7.59987	e2e3	unit	4.58915
pH 7_b	8.49361	e2e3	unit	4.47405
pH 7_b	9.39246	e2e3	unit	4.53157
pH 7_b	10.8871	e2e3	unit	4.39723
pH 7_b	12.3808	e2e3	unit	4.26465
pH 7_b	13.8806	e2e3	unit	4.27902
pH 7_b	15.3446	e2e3	unit	4.1945
pH 7_b	16.8373	e2e3	unit	4.25809
pH 7_a	0.263744	a254	cm-1	2.30293
pH 7_a	0.676465	a254	cm-1	1.55683
pH 7_a	1.63654	a254	cm-1	1.03403
pH 7_a	0.263744	e2e3	unit	7.3287
pH 7_a	0.676465	e2e3	unit	6.29513
pH 7_a	1.63654	e2e3	unit	5.7429
pH 7_a	2.85263	e2e3	unit	5.42123
pH 7_a	4.02348	e2e3	unit	5.18637
pH 7_a	4.59621	e2e3	unit	5.00529
pH 7_a	6.96991	e2e3	unit	4.8145
pH 7_a	12.3242	e2e3	unit	4.44887
pH 7_a	12.3242	e2e3	unit	4.39285
pH 7_a	15.082	e2e3	unit	4.37221
pH 7_a	15.082	e2e3	unit	4.38165
pH 7_a	19.7709	e2e3	unit	4.17664
pH 7_a	2.85263	a254	cm-1	0.920409
pH 7_a	4.02348	a254	cm-1	0.884078
pH 7_a	4.59621	a254	cm-1	0.879233
pH 7_a	6.96991	a254	cm-1	0.834857
pH 7_a	12.3242	a254	cm-1	1.07591
pH 7_a	12.3242	a254	cm-1	1.07342
pH 7_a	15.082	a254	cm-1	0.906289
pH 7_a	15.082	a254	cm-1	0.906281
pH 7_a	19.7709	a254	cm-1	0.796297
pH 10 Ca_b	2.957	a254	cm-1	1.26654
pH 10 Ca_b	3.186	a254	cm-1	1.20366
pH 10 Ca_b	3.417	a254	cm-1	1.13029
pH 10 Ca_b	3.648	a254	cm-1	1.08157
pH 10 Ca_b	3.879	a254	cm-1	1.00467
pH 10 Ca_b	4.109	a254	cm-1	0.889941
pH 10 Ca_b	4.339	a254	cm-1	0.78655
pH 10 Ca_b	4.567	a254	cm-1	0.71345
pH 10 Ca_b	5.387	a254	cm-1	0.597797
pH 10 Ca_b	6.222	a254	cm-1	0.568666
pH 10 Ca_b	7.03	a254	cm-1	0.63437
pH 10 Ca_b	2.957	e2e3	unit	5.98383
pH 10 Ca_b	3.186	e2e3	unit	5.88163
pH 10 Ca_b	3.417	e2e3	unit	5.85356
pH 10 Ca_b	3.648	e2e3	unit	5.76203
pH 10 Ca_b	3.879	e2e3	unit	5.78062
pH 10 Ca_b	4.109	e2e3	unit	5.75166
pH 10 Ca_b	4.339	e2e3	unit	5.79122
pH 10 Ca_b	4.567	e2e3	unit	5.71498
pH 10 Ca_b	5.387	e2e3	unit	5.89872
pH 10 Ca_b	6.222	e2e3	unit	6.15429
pH 10 Ca_b	7.03	e2e3	unit	6.10176
pH 10 Ca_b	7.848	a254	cm-1	0.707591
pH 10 Ca_b	8.64	a254	cm-1	0.729455
pH 10 Ca_b	9.471	a254	cm-1	0.791477
pH 10 Ca_b	10.306	a254	cm-1	0.870413
pH 10 Ca_b	11.145	a254	cm-1	0.97099
pH 10 Ca_b	11.979	a254	cm-1	1.07835
pH 10 Ca_b	12.818	a254	cm-1	1.16268
pH 10 Ca_b	13.651	a254	cm-1	1.18215
pH 10 Ca_b	14.488	a254	cm-1	1.27561
pH 10 Ca_b	15.33	a254	cm-1	1.95217
pH 10 Ca_b	7.848	e2e3	unit	6.06011
pH 10 Ca_b	8.64	e2e3	unit	5.81014
pH 10 Ca_b	9.471	e2e3	unit	5.65621
pH 10 Ca_b	10.306	e2e3	unit	5.34517
pH 10 Ca_b	11.145	e2e3	unit	4.74472
pH 10 Ca_b	11.979	e2e3	unit	4.53081
pH 10 Ca_b	12.818	e2e3	unit	4.38932
pH 10 Ca_b	13.651	e2e3	unit	4.13838
pH 10 Ca_b	14.488	e2e3	unit	3.94543
pH 10 Ca_b	15.33	e2e3	unit	4.44267
pH 10 Ca_b	16.164	a254	cm-1	3.08076
pH 10 Ca_b	17.003	a254	cm-1	2.49196
pH 10 Ca_b	17.848	a254	cm-1	1.38813
pH 10 Ca_b	21.122	a254	cm-1	0.778112
pH 10 Ca_b	24.388	a254	cm-1	0.63238
pH 10 Ca_b	16.164	e2e3	unit	5.04863
pH 10 Ca_b	17.003	e2e3	unit	4.97213
pH 10 Ca_b	17.848	e2e3	unit	4.91452
pH 10 Ca_b	21.122	e2e3	unit	4.72967
pH 10 Ca_b	24.388	e2e3	unit	4.59782
pH 10 Ca_b	29.433	a254	cm-1	0.512048
pH 10 Ca_b	32.7	a254	cm-1	0.482375
pH 10 Ca_b	36.079	a254	cm-1	0.431796
pH 10 Ca_b	41.102	a254	cm-1	0.418998
pH 10 Ca_b	44.478	a254	cm-1	0.390303
pH 10 Ca_b	52.71	a254	cm-1	0.364296
pH 10 Ca_b	29.433	e2e3	unit	4.60494
pH 10 Ca_b	32.7	e2e3	unit	4.48016
pH 10 Ca_b	36.079	e2e3	unit	4.44029
pH 10 Ca_b	41.102	e2e3	unit	4.32046
pH 10 Ca_b	44.478	e2e3	unit	4.24807
pH 10 Ca_b	52.71	e2e3	unit	4.13909
pH 10 Na_a	4.00492	a254	cm-1	15.1513
pH 10 Na_a	4.3096	a254	cm-1	16.6704
pH 10 Na_a	4.61547	a254	cm-1	16.5761
pH 10 Na_a	4.92254	a254	cm-1	16.2229
pH 10 Na_a	5.22841	a254	cm-1	18.7228
pH 10 Na_a	5.53428	a254	cm-1	14.6101
pH 10 Na_a	5.84135	a254	cm-1	15.3957
pH 10 Na_a	6.1496	a254	cm-1	11.086
pH 10 Na_a	7.25289	a254	cm-1	10.004
pH 10 Na_a	4.00492	e2e3	unit	4.04226
pH 10 Na_a	4.3096	e2e3	unit	3.95026
pH 10 Na_a	4.61547	e2e3	unit	3.94401
pH 10 Na_a	4.92254	e2e3	unit	3.90257
pH 10 Na_a	5.22841	e2e3	unit	3.86301
pH 10 Na_a	5.53428	e2e3	unit	3.83101
pH 10 Na_a	5.84135	e2e3	unit	3.82791
pH 10 Na_a	6.1496	e2e3	unit	3.54146
pH 10 Na_a	7.25289	e2e3	unit	3.80268
pH 10 Na_a	8.36093	a254	cm-1	10.0387
pH 10 Na_a	9.46898	a254	cm-1	8.93767
pH 10 Na_a	10.5794	a254	cm-1	7.32912
pH 10 Na_a	11.6827	a254	cm-1	5.80909
pH 10 Na_a	12.7848	a254	cm-1	4.59344
pH 10 Na_a	13.8905	a254	cm-1	4.61935
pH 10 Na_a	15.0009	a254	cm-1	4.37989
pH 10 Na_a	16.1018	a254	cm-1	4.1266
pH 10 Na_a	17.2075	a254	cm-1	3.76088
pH 10 Na_a	18.3072	a254	cm-1	4.01047
pH 10 Na_a	19.42	a254	cm-1	7.27142
pH 10 Na_a	8.36093	e2e3	unit	3.67131
pH 10 Na_a	9.46898	e2e3	unit	3.63095
pH 10 Na_a	10.5794	e2e3	unit	3.52039
pH 10 Na_a	11.6827	e2e3	unit	3.48274
pH 10 Na_a	12.7848	e2e3	unit	3.39568
pH 10 Na_a	13.8905	e2e3	unit	3.57897
pH 10 Na_a	15.0009	e2e3	unit	3.55531
pH 10 Na_a	16.1018	e2e3	unit	3.53048
pH 10 Na_a	17.2075	e2e3	unit	3.54869
pH 10 Na_a	18.3072	e2e3	unit	3.5582
pH 10 Na_a	19.42	e2e3	unit	3.73805
pH 10 Na_a	20.5328	a254	cm-1	6.83646
pH 10 Na_a	21.6349	a254	cm-1	4.96779
pH 10 Na_a	22.7417	a254	cm-1	3.87265
pH 10 Na_a	23.851	a254	cm-1	3.44188
pH 10 Na_a	28.207	a254	cm-1	2.70538
pH 10 Na_a	32.5559	a254	cm-1	2.33915
pH 10 Na_a	39.2708	a254	cm-1	2.49896
pH 10 Na_a	43.6209	a254	cm-1	2.43217
pH 10 Na_a	48.1185	a254	cm-1	2.21805
pH 10 Na_a	20.5328	e2e3	unit	3.40651
pH 10 Na_a	21.6349	e2e3	unit	3.15481
pH 10 Na_a	22.7417	e2e3	unit	3.14927
pH 10 Na_a	23.851	e2e3	unit	3.21563
pH 10 Na_a	28.207	e2e3	unit	3.27182
pH 10 Na_a	32.5559	e2e3	unit	3.32491
pH 10 Na_a	39.2708	e2e3	unit	3.23297
pH 10 Na_a	43.6209	e2e3	unit	3.20193
pH 10 Na_a	48.1185	e2e3	unit	3.15303
pH 10 Na_b	4.28952	a254	cm-1	3.487
pH 10 Na_b	4.61489	a254	cm-1	3.5236
pH 10 Na_b	4.94407	a254	cm-1	3.9284
pH 10 Na_b	5.27325	a254	cm-1	4.2305
pH 10 Na_b	5.60116	a254	cm-1	4.47168
pH 10 Na_b	5.92907	a254	cm-1	4.79079
pH 10 Na_b	6.25825	a254	cm-1	5.13808
pH 10 Na_b	6.58743	a254	cm-1	5.41986
pH 10 Na_b	7.74274	a254	cm-1	5.97998
pH 10 Na_b	4.28952	e2e3	unit	4.62591
pH 10 Na_b	4.61489	e2e3	unit	4.5354
pH 10 Na_b	4.94407	e2e3	unit	4.47197

## Sheet: Sheet2
col	tube	measurement	start_flow	end_flow	pv
3	1	3_1	0	0.0239	0.263744
3	2	3_2	0.0239	0.0409	0.451345
3	3	3_3	0.0409	0.0613	0.676465
3	4	3_4	0.0613	0.0761	0.839788
3	5	3_5	0.0761	0.1125	1.24147
3	6	3_6	0.1125	0.1483	1.63654
3	7	3_7	0.1483	0.1841	2.0316
3	8	3_8	0.1841	0.22	2.42777
3	9	3_9	0.22	0.2585	2.85263
3	10	3_10	0.2585	0.2939	3.24328
3	11	3_11	0.2939	0.3292	3.63283
3	12	3_12	0.3292	0.3646	4.02348
3	13	3_13	0.3646	0.3813	4.20777
3	14	3_14	0.3813	0.4165	4.59621
3	16	3_16	0.592	0.6316	6.96991
3	18	3_18	0.8747	0.9037	9.97262
3	20	3_20	1.081	1.1168	12.3242
3	23	3_23	1.1881	1.2238	13.505
3	26	3_26	1.2957	1.3315	14.6935
3	29	3_29	1.4026	1.4384	15.8732
3	32	3_32	1.5103	1.5465	17.0661
3	35	3_35	1.6182	1.654	18.2524
3	38	3_38	1.7193	1.7553	19.3703
3	41	3_41	1.8271	1.863	20.5588
3	44	3_44	1.9347	1.9706	21.7462
3	48	3_48	2.0773	2.1122	23.3088
3	52	3_52	2.2182	2.2537	24.8703
3	56	3_56	2.3608	2.3966	26.4472
3	62	3_62	2.5742	2.578	28.4491
3	66	3_66	3.8359	3.8452	42.433
3	67	3_67	5.362	5.418	59.7894
3	68	3_68	5.8411	5.8909	65.008
3	69	3_69	6.4581	6.5015	71.7461
3	70	3_70	8.617	8.6636	95.6056
3	71	3_71	11.8503	11.8963	131.279
3	72	3_72	12.7425	12.9248	142.629
3	73	3_73	14.669	14.7181	162.419
3	74	3_74	15.7615	15.8089	174.456
3	75	3_75	17.7259	17.7819	196.229
4	1	4_1	0	0.018	0.183646
4	2	4_2	0.018	0.038	0.387697
4	3	4_3	0.038	0.0471	0.48054
4	4	4_4	0.0471	0.0771	0.786616
4	5	4_5	0.0771	0.1063	1.08453
4	6	4_6	0.1063	0.1357	1.38448
4	7	4_7	0.1357	0.165	1.68342
4	8	4_8	0.165	0.1966	2.00582
4	9	4_9	0.1966	0.2256	2.30169
4	10	4_10	0.2256	0.2545	2.59655
4	11	4_11	0.2545	0.284	2.89752
4	12	4_12	0.284	0.3139	3.20258
4	13	4_13	0.3139	0.3427	3.49641
4	15	4_15	0.3994	0.4315	4.4024
4	17	4_17	0.4886	0.5125	5.2288
4	19	4_19	0.5698	0.5991	6.11234
4	20	4_20	0.5991	0.6282	6.40924
4	23	4_23	0.6865	0.7157	7.30196
4	26	4_26	0.7744	0.8034	8.19672
4	29	4_29	0.8619	0.8911	9.09148
4	32	4_32	0.95	0.9794	9.99237
4	35	4_35	1.0378	1.0671	10.8871
4	38	4_38	1.1258	1.1552	11.786
4	41	4_41	1.2135	1.2429	12.6807
4	44	4_44	1.3017	1.331	13.5796
4	48	4_48	1.4173	1.446	14.7529
4	52	4_52	1.5333	1.5624	15.9404
4	56	4_56	1.6503	1.6792	17.1321
4	61	4_61	1.7963	1.8256	18.6258
4	65	4_65	2.5096	2.5371	25.8849
4	66	4_66	2.858	2.8657	29.2374
4	67	4_67	4.1104	4.1564	42.4058
4	68	4_68	4.5036	4.5446	46.3665
4	69	4_69	5.01	5.0452	51.4739
4	70	4_70	6.7812	6.8306	69.6895
4	71	4_71	9.4457	9.4835	96.7558
4	72	4_72	10.1779	10.3275	105.367
4	73	4_73	11.7588	11.8017	120.407
4	74	4_74	12.6578	12.6994	129.566
4	75	4_75	14.2725	14.3214	146.115
13	1	13_1	0	0.0206	0.209266
13	2	13_2	0.0206	0.043	0.436818
13	3	13_3	0.043	0.0687	0.697893
13	4	13_4	0.0687	0.0912	0.92646
13	5	13_5	0.0912	0.1136	1.15401
13	6	13_6	0.1136	0.1361	1.38258
13	7	13_7	0.1361	0.1584	1.60912
13	8	13_8	0.1584	0.1805	1.83362
13	9	13_9	0.1805	0.2028	2.06015
13	10	13_10	0.2028	0.2253	2.28872
13	11	13_11	0.2253	0.2477	2.51627
13	12	13_12	0.2477	0.2702	2.74484
13	13	13_13	0.2702	0.292	2.9663
13	14	13_14	0.292	0.3144	3.19385
13	15	13_15	0.3144	0.3368	3.4214
13	16	13_16	0.3368	0.3593	3.64997
13	17	13_17	0.3593	0.3817	3.87752
13	18	13_18	0.3817	0.4042	4.10609
13	19	13_19	0.4042	0.4267	4.33466
13	20	13_20	0.4267	0.4492	4.56322
13	21	13_21	0.4895	0.5298	5.382
13	22	13_22	0.5703	0.6109	6.20586
13	23	13_23	0.6514	0.6919	7.0287
13	24	13_24	0.7326	0.7732	7.85459
13	25	13_25	0.8137	0.8542	8.67744
13	26	13_26	0.8947	0.9352	9.50028
13	27	13_27	0.9755	1.0159	10.3201
13	28	13_28	1.0565	1.0971	11.145
13	29	13_29	1.1378	1.1785	11.9719
13	30	13_30	1.2193	1.2601	12.8008
13	31	13_31	1.3004	1.3408	13.6206
13	32	13_32	1.3811	1.4214	14.4394
13	33	13_33	1.4622	1.5029	15.2673
13	34	13_34	1.5432	1.5835	16.0861
13	35	13_35	1.6242	1.6649	16.913
13	36	13_36	1.7058	1.7466	17.7429
13	37	13_37	2.0394	2.0662	20.9896
13	38	13_38	2.359	2.3847	24.2251
13	39	13_39	2.8509	2.877	29.2262
13	40	13_40	3.1778	3.1958	32.4647
13	41	13_41	3.5015	3.5203	35.7612
13	42	13_42	3.9894	4.0111	40.747
13	43	13_43	4.3075	4.3403	44.0912
13	44	13_44	5.12	5.1441	52.2566
13	46	13_46	6.5789	6.6027	67.0739
13	47	13_47	7.5853	7.6048	77.2538
13	48	13_48	8.0386	8.0639	81.9176
13	49	13_49	8.8968	8.9165	90.5788
13	50	13_50	9.6635	9.6775	98.3094
13	51	13_51	10.3192	10.3388	105.027
13	52	13_52	11.1351	11.1577	113.346
13	53	13_53	11.927	11.9412	121.305
14	1	14_1	0	0.032	0.488264
14	2	14_2	0.032	0.0584	0.891081
14	3	14_3	0.0584	0.0848	1.2939
14	4	14_4	0.0848	0.1112	1.69672
14	5	14_5	0.1112	0.1375	2.09801
14	6	14_6	0.1375	0.1636	2.49625
14	7	14_7	0.1636	0.1897	2.89449
14	8	14_8	0.1897	0.216	3.29578
14	9	14_9	0.216	0.2422	3.69554
14	10	14_10	0.2422	0.2686	4.09836
14	11	14_11	0.2686	0.2949	4.49965
14	12	14_12	0.2949	0.3212	4.90095
14	13	14_13	0.3212	0.3475	5.30224
14	14	14_14	0.3475	0.3738	5.70353
14	15	14_15	0.3738	0.4001	6.10482
14	16	14_16	0.4001	0.4264	6.50611
14	17	14_17	0.4264	0.4528	6.90893
14	18	14_18	0.4528	0.4791	7.31022
14	19	14_19	0.4791	0.5055	7.71304
14	20	14_20	0.5055	0.532	8.11738
14	21	14_21	0.5792	0.6265	9.55928
14	22	14_22	0.674	0.7216	11.0103
14	23	14_23	0.7692	0.8167	12.4614
14	24	14_24	0.8644	0.9122	13.9186
14	25	14_25	0.9596	1.007	15.365
14	26	14_26	1.0546	1.1022	16.8176
14	27	14_27	1.1497	1.1972	18.2672
14	28	14_28	1.2448	1.2925	19.7213
14	29	14_29	1.3402	1.3879	21.1769
14	30	14_30	1.4358	1.4837	22.6386
14	31	14_31	1.531	1.5784	24.0836
14	32	14_32	1.6259	1.6735	25.5347
14	33	14_33	1.7213	1.7691	26.9933
14	34	14_34	1.8165	1.864	28.4413
14	35	14_35	1.9118	1.9596	29.9
14	36	14_36	2.0076	2.0556	31.3648
14	37	14_37	2.3994	2.4307	37.0882
14	38	14_38	2.7745	2.8048	42.7963
14	39	14_39	3.3523	3.3829	51.6171
14	40	14_40	3.7362	3.7574	57.3313
14	41	14_41	4.1163	4.1448	63.2423
14	42	14_42	4.6957	4.721	72.0341
14	43	14_43	5.0691	5.1074	77.9299
14	44	14_44	6.0231	6.0511	92.3291
14	46	14_46	7.7361	7.7639	118.463
14	47	14_47	8.9178	8.9408	136.421
14	48	14_48	9.4502	9.4796	144.642
14	49	14_49	10.4578	10.4806	159.915
14	50	14_50	11.3579	11.3741	173.549
14	51	14_51	12.1277	12.1503	185.392
14	52	14_52	13.0842	13.1103	200.04
14	53	14_53	14.0151	14.0316	214.097
17	1	17_1	0	0.0273	0.324916
17	2	17_2	0.0273	0.0528	0.628409
17	3	17_3	0.0528	0.0785	0.934282
17	4	17_4	0.0785	0.1044	1.24254
17	5	17_5	0.1044	0.1303	1.55079
17	6	17_6	0.1303	0.1562	1.85904
17	7	17_7	0.1562	0.1818	2.16373
17	8	17_8	0.1818	0.2076	2.47079
17	9	17_9	0.2076	0.2332	2.77547
17	10	17_10	0.2332	0.2589	3.08135
17	11	17_11	0.2589	0.2847	3.38841
17	12	17_12	0.2847	0.3106	3.69666
17	13	17_13	0.3106	0.3365	4.00492
17	14	17_14	0.3365	0.3621	4.3096
17	15	17_15	0.3621	0.3878	4.61547
17	16	17_16	0.3878	0.4136	4.92254
17	17	17_17	0.4136	0.4393	5.22841
17	18	17_18	0.4393	0.465	5.53428
17	19	17_19	0.465	0.4908	5.84135
17	20	17_20	0.4908	0.5167	6.1496
17	21	17_21	0.563	0.6094	7.25289
17	22	17_22	0.6559	0.7025	8.36093
17	23	17_23	0.749	0.7956	9.46898
17	24	17_24	0.8422	0.8889	10.5794
17	25	17_25	0.9352	0.9816	11.6827
17	26	17_26	1.0279	1.0742	12.7848
17	27	17_27	1.1206	1.1671	13.8905
17	28	17_28	1.2137	1.2604	15.0009
17	29	17_29	1.3066	1.3529	16.1018
17	30	17_30	1.3993	1.4458	17.2075
17	31	17_31	1.492	1.5382	18.3072
17	32	17_32	1.5849	1.6317	19.42
17	33	17_33	1.6784	1.7252	20.5328
17	34	17_34	1.7715	1.8178	21.6349
17	35	17_35	1.8643	1.9108	22.7417
17	36	17_36	1.9574	2.004	23.851
17	37	17_37	2.3397	2.37	28.207
17	38	17_38	2.7057	2.7354	32.5559
17	39	17_39	3.2699	3.2996	39.2708
17	40	17_40	3.6444	3.6651	43.6209
17	41	17_41	4.0155	4.043	48.1185
17	42	17_42	4.5807	4.605	54.8073
17	43	17_43	4.9448	4.9822	59.2966
17	44	17_44	5.876	5.9036	70.2628
17	46	17_46	7.5484	7.5756	90.1624
17	47	17_47	8.7021	8.7245	103.836
17	48	17_48	9.2218	9.251	110.102
17	49	17_49	10.2058	10.2288	121.74
17	50	17_50	11.0852	11.1012	132.123
17	51	17_51	11.8369	11.8591	141.143
17	52	17_52	12.774	12.7996	152.337
17	53	17_53	13.6795	13.6957	163.002
18	1	18_1	0	0.0285	0.362226
18	2	18_2	0.0285	0.054	0.686323
18	3	18_3	0.054	0.0797	1.01296
18	4	18_4	0.0797	0.1054	1.3396
18	5	18_5	0.1054	0.1312	1.66751
18	6	18_6	0.1312	0.157	1.99542
18	7	18_7	0.157	0.1826	2.32079
18	8	18_8	0.1826	0.2084	2.6487
18	9	18_9	0.2084	0.2341	2.97534
18	10	18_10	0.2341	0.2598	3.30198
18	11	18_11	0.2598	0.2856	3.62988
18	12	18_12	0.2856	0.3116	3.96034
18	13	18_13	0.3116	0.3375	4.28952
18	14	18_14	0.3375	0.3631	4.61489
18	15	18_15	0.3631	0.389	4.94407
18	16	18_16	0.389	0.4149	5.27325
18	17	18_17	0.4149	0.4407	5.60116
18	18	18_18	0.4407	0.4665	5.92907
18	19	18_19	0.4665	0.4924	6.25825
18	20	18_20	0.4924	0.5183	6.58743
18	21	18_21	0.5637	0.6092	7.74274
18	22	18_22	0.656	0.7029	8.93363
18	23	18_23	0.7478	0.7927	10.075
18	24	18_24	0.8394	0.886	11.2608
18	25	18_25	0.9295	0.973	12.3665
18	26	18_26	1.016	1.0589	13.4583
18	27	18_27	1.0963	1.1336	14.4077
18	28	18_28	1.1723	1.2109	15.3902
18	29	18_29	1.2559	1.3008	16.5328
18	30	18_30	1.3462	1.3917	17.6881
18	31	18_31	1.437	1.4823	18.8396
18	32	18_32	1.528	1.5738	20.0025
18	33	18_33	1.6198	1.6658	21.1718
18	34	18_34	1.7114	1.757	22.3309
18	35	18_35	1.8026	1.8482	23.49
18	36	18_36	1.8941	1.9399	24.6555
18	37	18_37	2.2607	2.2893	29.0963
18	38	18_38	2.6101	2.6372	33.518
18	39	18_39	3.1481	3.1757	40.3621
18	40	18_40	3.5053	3.5245	44.7953
18	41	18_41	3.8594	3.8854	49.3822
18	42	18_42	4.3993	4.4203	56.1806
18	43	18_43	4.7451	4.7811	60.7663
18	44	18_44	5.6354	5.6621	71.9635
18	46	18_46	7.2343	7.2607	92.2812
18	47	18_47	8.3374	8.3599	106.252
18	48	18_48	8.8352	8.8647	112.668
18	49	18_49	9.7774	9.8001	124.556
18	50	18_50	10.6186	10.635	135.167
18	51	18_51	11.3382	11.361	144.395
18	52	18_52	12.2373	12.2638	155.869
18	53	18_53	13.103	13.1197	166.747
3	1	3_1	0	0.0239	0.263744
3	2	3_2	0.0239	0.0409	0.451345
3	3	3_3	0.0409	0.0613	0.676465
3	4	3_4	0.0613	0.0761	0.839788
3	5	3_5	0.0761	0.1125	1.24147
3	6	3_6	0.1125	0.1483	1.63654
3	7	3_7	0.1483	0.1841	2.0316
3	8	3_8	0.1841	0.22	2.42777
3	9	3_9	0.22	0.2585	2.85263
3	10	3_10	0.2585	0.2939	3.24328
3	11	3_11	0.2939	0.3292	3.63283
3	12	3_12	0.3292	0.3646	4.02348
3	13	3_13	0.3646	0.3813	4.20777
3	14	3_14	0.3813	0.4165	4.59621
3	16	3_16	0.592	0.6316	6.96991
3	18	3_18	0.8747	0.9037	9.97262
3	20	3_20	1.081	1.1168	12.3242
3	23	3_23	1.1881	1.2238	13.505
3	26	3_26	1.2957	1.3315	14.6935
3	29	3_29	1.4026	1.4384	15.8732
3	32	3_32	1.5103	1.5465	17.0661
3	35	3_35	1.6182	1.654	18.2524
3	38	3_38	1.7193	1.7553	19.3703
3	41	3_41	1.8271	1.863	20.5588
3	44	3_44	1.9347	1.9706	21.7462
3	48	3_48	2.0773	2.1122	23.3088
3	52	3_52	2.2182	2.2537	24.8703
3	56	3_56	2.3608	2.3966	26.4472
3	62	3_62	2.5742	2.578	28.4491
3	66	3_66	3.8359	3.8452	42.433
3	67	3_67	5.362	5.418	59.7894
3	68	3_68	5.8411	5.8909	65.008
3	69	3_69	6.4581	6.5015	71.7461
3	70	3_70	8.617	8.6636	95.6056
3	71	3_71	11.8503	11.8963	131.279
3	72	3_72	12.7425	12.9248	142.629
3	73	3_73	14.669	14.7181	162.419
3	74	3_74	15.7615	15.8089	174.456
3	75	3_75	17.7259	17.7819	196.229
4	1	4_1	0	0.018	0.183646
4	2	4_2	0.018	0.038	0.387697
4	3	4_3	0.038	0.0471	0.48054
4	4	4_4	0.0471	0.0771	0.786616
4	5	4_5	0.0771	0.1063	1.08453
4	6	4_6	0.1063	0.1357	1.38448
4	7	4_7	0.1357	0.165	1.68342
4	8	4_8	0.165	0.1966	2.00582
4	9	4_9	0.1966	0.2256	2.30169
4	10	4_10	0.2256	0.2545	2.59655
4	11	4_11	0.2545	0.284	2.89752
4	12	4_12	0.284	0.3139	3.20258
4	13	4_13	0.3139	0.3427	3.49641
4	15	4_15	0.3994	0.4315	4.4024
4	17	4_17	0.4886	0.5125	5.2288
4	19	4_19	0.5698	0.5991	6.11234
4	20	4_20	0.5991	0.6282	6.40924
4	23	4_23	0.6865	0.7157	7.30196
4	26	4_26	0.7744	0.8034	8.19672
4	29	4_29	0.8619	0.8911	9.09148
4	32	4_32	0.95	0.9794	9.99237
4	35	4_35	1.0378	1.0671	10.8871
4	38	4_38	1.1258	1.1552	11.786
4	41	4_41	1.2135	1.2429	12.6807
4	44	4_44	1.3017	1.331	13.5796
4	48	4_48	1.4173	1.446	14.7529
4	52	4_52	1.5333	1.5624	15.9404
4	56	4_56	1.6503	1.6792	17.1321
4	61	4_61	1.7963	1.8256	18.6258
4	65	4_65	2.5096	2.5371	25.8849
4	66	4_66	2.858	2.8657	29.2374
4	67	4_67	4.1104	4.1564	42.4058
4	68	4_68	4.5036	4.5446	46.3665
4	69	4_69	5.01	5.0452	51.4739
4	70	4_70	6.7812	6.8306	69.6895
4	71	4_71	9.4457	9.4835	96.7558
4	72	4_72	10.1779	10.3275	105.367
4	73	4_73	11.7588	11.8017	120.407
4	74	4_74	12.6578	12.6994	129.566
4	75	4_75	14.2725	14.3214	146.115
13	1	13_1	0	0.0206	0.209266
13	2	13_2	0.0206	0.043	0.436818
13	3	13_3	0.043	0.0687	0.697893
13	4	13_4	0.0687	0.0912	0.92646
13	5	13_5	0.0912	0.1136	1.15401
13	6	13_6	0.1136	0.1361	1.38258
13	7	13_7	0.1361	0.1584	1.60912
13	8	13_8	0.1584	0.1805	1.83362
13	9	13_9	0.1805	0.2028	2.06015
13	10	13_10	0.2028	0.2253	2.28872
13	11	13_11	0.2253	0.2477	2.51627
13	12	13_12	0.2477	0.2702	2.74484
13	13	13_13	0.2702	0.292	2.9663
13	14	13_14	0.292	0.3144	3.19385
13	15	13_15	0.3144	0.3368	3.4214
13	16	13_16	0.3368	0.3593	3.64997
13	17	13_17	0.3593	0.3817	3.87752
13	18	13_18	0.3817	0.4042	4.10609
13	19	13_19	0.4042	0.4267	4.33466
13	20	13_20	0.4267	0.4492	4.56322
13	21	13_21	0.4895	0.5298	5.382
13	22	13_22	0.5703	0.6109	6.20586
13	23	13_23	0.6514	0.6919	7.0287
13	24	13_24	0.7326	0.7732	7.85459
13	25	13_25	0.8137	0.8542	8.67744
13	26	13_26	0.8947	0.9352	9.50028
13	27	13_27	0.9755	1.0159	10.3201
13	28	13_28	1.0565	1.0971	11.145
13	29	13_29	1.1378	1.1785	11.9719
13	30	13_30	1.2193	1.2601	12.8008
13	31	13_31	1.3004	1.3408	13.6206
13	32	13_32	1.3811	1.4214	14.4394
13	33	13_33	1.4622	1.5029	15.2673
13	34	13_34	1.5432	1.5835	16.0861
13	35	13_35	1.6242	1.6649	16.913
13	36	13_36	1.7058	1.7466	17.7429
13	37	13_37	2.0394	2.0662	20.9896
13	38	13_38	2.359	2.3847	24.2251
13	39	13_39	2.8509	2.877	29.2262
13	40	13_40	3.1778	3.1958	32.4647
13	41	13_41	3.5015	3.5203	35.7612
13	42	13_42	3.9894	4.0111	40.747
13	43	13_43	4.3075	4.3403	44.0912
13	44	13_44	5.12	5.1441	52.2566
13	46	13_46	6.5789	6.6027	67.0739
13	47	13_47	7.5853	7.6048	77.2538
13	48	13_48	8.0386	8.0639	81.9176
13	49	13_49	8.8968	8.9165	90.5788
13	50	13_50	9.6635	9.6775	98.3094
13	51	13_51	10.3192	10.3388	105.027
13	52	13_52	11.1351	11.1577	113.346
13	53	13_53	11.927	11.9412	121.305
14	1	14_1	0	0.032	0.488264
14	2	14_2	0.032	0.0584	0.891081
14	3	14_3	0.0584	0.0848	1.2939
14	4	14_4	0.0848	0.1112	1.69672
14	5	14_5	0.1112	0.1375	2.09801
14	6	14_6	0.1375	0.1636	2.49625
14	7	14_7	0.1636	0.1897	2.89449
14	8	14_8	0.1897	0.216	3.29578
14	9	14_9	0.216	0.2422	3.69554
14	10	14_10	0.2422	0.2686	4.09836
14	11	14_11	0.2686	0.2949	4.49965
14	12	14_12	0.2949	0.3212	4.90095
14	13	14_13	0.3212	0.3475	5.30224
14	14	14_14	0.3475	0.3738	5.70353
14	15	14_15	0.3738	0.4001	6.10482
14	16	14_16	0.4001	0.4264	6.50611
14	17	14_17	0.4264	0.4528	6.90893
14	18	14_18	0.4528	0.4791	7.31022
14	19	14_19	0.4791	0.5055	7.71304
14	20	14_20	0.5055	0.532	8.11738
14	21	14_21	0.5792	0.6265	9.55928
14	22	14_22	0.674	0.7216	11.0103
14	23	14_23	0.7692	0.8167	12.4614
14	24	14_24	0.8644	0.9122	13.9186
14	25	14_25	0.9596	1.007	15.365
14	26	14_26	1.0546	1.1022	16.8176
14	27	14_27	1.1497	1.1972	18.2672
14	28	14_28	1.2448	1.2925	19.7213
14	29	14_29	1.3402	1.3879	21.1769
14	30	14_30	1.4358	1.4837	22.6386
14	31	14_31	1.531	1.5784	24.0836
14	32	14_32	1.6259	1.6735	25.5347
14	33	14_33	1.7213	1.7691	26.9933
14	34	14_34	1.8165	1.864	28.4413
14	35	14_35	1.9118	1.9596	29.9
14	36	14_36	2.0076	2.0556	31.3648
14	37	14_37	2.3994	2.4307	37.0882
14	38	14_38	2.7745	2.8048	42.7963
14	39	14_39	3.3523	3.3829	51.6171
14	40	14_40	3.7362	3.7574	57.3313
14	41	14_41	4.1163	4.1448	63.2423
14	42	14_42	4.6957	4.721	72.0341
14	43	14_43	5.0691	5.1074	77.9299
14	44	14_44	6.0231	6.0511	92.3291
14	46	14_46	7.7361	7.7639	118.463
14	47	14_47	8.9178	8.9408	136.421
14	48	14_48	9.4502	9.4796	144.642
14	49	14_49	10.4578	10.4806	159.915
14	50	14_50	11.3579	11.3741	173.549
14	51	14_51	12.1277	12.1503	185.392
14	52	14_52	13.0842	13.1103	200.04
14	53	14_53	14.0151	14.0316	214.097
17	1	17_1	0	0.0273	0.324916
17	2	17_2	0.0273	0.0528	0.628409
17	3	17_3	0.0528	0.0785	0.934282
17	4	17_4	0.0785	0.1044	1.24254
17	5	17_5	0.1044	0.1303	1.55079
17	6	17_6	0.1303	0.1562	1.85904
17	7	17_7	0.1562	0.1818	2.16373
17	8	17_8	0.1818	0.2076	2.47079
17	9	17_9	0.2076	0.2332	2.77547
17	10	17_10	0.2332	0.2589	3.08135
17	11	17_11	0.2589	0.2847	3.38841
17	12	17_12	0.2847	0.3106	3.69666
17	13	17_13	0.3106	0.3365	4.00492
17	14	17_14	0.3365	0.3621	4.3096
17	15	17_15	0.3621	0.3878	4.61547
17	16	17_16	0.3878	0.4136	4.92254
17	17	17_17	0.4136	0.4393	5.22841
17	18	17_18	0.4393	0.465	5.53428
17	19	17_19	0.465	0.4908	5.84135
17	20	17_20	0.4908	0.5167	6.1496
17	21	17_21	0.563	0.6094	7.25289
17	22	17_22	0.6559	0.7025	8.36093
17	23	17_23	0.749	0.7956	9.46898
17	24	17_24	0.8422	0.8889	10.5794
17	25	17_25	0.9352	0.9816	11.6827
17	26	17_26	1.0279	1.0742	12.7848
17	27	17_27	1.1206	1.1671	13.8905
17	28	17_28	1.2137	1.2604	15.0009
17	29	17_29	1.3066	1.3529	16.1018
17	30	17_30	1.3993	1.4458	17.2075
17	31	17_31	1.492	1.5382	18.3072
17	32	17_32	1.5849	1.6317	19.42
17	33	17_33	1.6784	1.7252	20.5328
17	34	17_34	1.7715	1.8178	21.6349
17	35	17_35	1.8643	1.9108	22.7417
17	36	17_36	1.9574	2.004	23.851
17	37	17_37	2.3397	2.37	28.207
17	38	17_38	2.7057	2.7354	32.5559
17	39	17_39	3.2699	3.2996	39.2708
17	40	17_40	3.6444	3.6651	43.6209
17	41	17_41	4.0155	4.043	48.1185
17	42	17_42	4.5807	4.605	54.8073
17	43	17_43	4.9448	4.9822	59.2966
17	44	17_44	5.876	5.9036	70.2628
17	46	17_46	7.5484	7.5756	90.1624
17	47	17_47	8.7021	8.7245	103.836
17	48	17_48	9.2218	9.251	110.102
17	49	17_49	10.2058	10.2288	121.74
17	50	17_50	11.0852	11.1012	132.123
17	51	17_51	11.8369	11.8591	141.143
17	52	17_52	12.774	12.7996	152.337
17	53	17_53	13.6795	13.6957	163.002
18	1	18_1	0	0.0285	0.362226
18	2	18_2	0.0285	0.054	0.686323
18	3	18_3	0.054	0.0797	1.01296
18	4	18_4	0.0797	0.1054	1.3396
18	5	18_5	0.1054	0.1312	1.66751
18	6	18_6	0.1312	0.157	1.99542
18	7	18_7	0.157	0.1826	2.32079
18	8	18_8	0.1826	0.2084	2.6487
18	9	18_9	0.2084	0.2341	2.97534
18	10	18_10	0.2341	0.2598	3.30198
18	11	18_11	0.2598	0.2856	3.62988
18	12	18_12	0.2856	0.3116	3.96034
18	13	18_13	0.3116	0.3375	4.28952
18	14	18_14	0.3375	0.3631	4.61489
18	15	18_15	0.3631	0.389	4.94407
18	16	18_16	0.389	0.4149	5.27325
18	17	18_17	0.4149	0.4407	5.60116
18	18	18_18	0.4407	0.4665	5.92907
18	19	18_19	0.4665	0.4924	6.25825
18	20	18_20	0.4924	0.5183	6.58743
18	21	18_21	0.5637	0.6092	7.74274
18	22	18_22	0.656	0.7029	8.93363
18	23	18_23	0.7478	0.7927	10.075
18	24	18_24	0.8394	0.886	11.2608
18	25	18_25	0.9295	0.973	12.3665
18	26	18_26	1.016	1.0589	13.4583
18	27	18_27	1.0963	1.1336	14.4077
18	28	18_28	1.1723	1.2109	15.3902
18	29	18_29	1.2559	1.3008	16.5328
18	30	18_30	1.3462	1.3917	17.6881
18	31	18_31	1.437	1.4823	18.8396
18	32	18_32	1.528	1.5738	20.0025
18	33	18_33	1.6198	1.6658	21.1718
18	34	18_34	1.7114	1.757	22.3309
18	35	18_35	1.8026	1.8482	23.49
18	36	18_36	1.8941	1.9399	24.6555
18	37	18_37	2.2607	2.2893	29.0963
18	38	18_38	2.6101	2.6372	33.518
18	39	18_39	3.1481	3.1757	40.3621
18	40	18_40	3.5053	3.5245	44.7953
18	41	18_41	3.8594	3.8854	49.3822
18	42	18_42	4.3993	4.4203	56.1806
18	43	18_43	4.7451	4.7811	60.7663
18	44	18_44	5.6354	5.6621	71.9635
18	46	18_46	7.2343	7.2607	92.2812
18	47	18_47	8.3374	8.3599	106.252
18	48	18_48	8.8352	8.8647	112.668
18	49	18_49	9.7774	9.8001	124.556
18	50	18_50	10.6186	10.635	135.167
18	51	18_51	11.3382	11.361	144.395
18	52	18_52	12.2373	12.2638	155.869
18	53	18_53	13.103	13.1197	166.747
3	1	3_1	0	0.0239	0.263744
3	2	3_2	0.0239	0.0409	0.451345
3	3	3_3	0.0409	0.0613	0.676465
3	4	3_4	0.0613	0.0761	0.839788
3	5	3_5	0.0761	0.1125	1.24147
3	6	3_6	0.1125	0.1483	1.63654
3	7	3_7	0.1483	0.1841	2.0316
3	8	3_8	0.1841	0.22	2.42777
3	9	3_9	0.22	0.2585	2.85263
3	10	3_10	0.2585	0.2939	3.24328
3	11	3_11	0.2939	0.3292	3.63283
3	12	3_12	0.3292	0.3646	4.02348
3	13	3_13	0.3646	0.3813	4.20777
3	14	3_14	0.3813	0.4165	4.59621
3	16	3_16	0.592	0.6316	6.96991
3	18	3_18	0.8747	0.9037	9.97262
3	20	3_20	1.081	1.1168	12.3242
3	23	3_23	1.1881	1.2238	13.505
3	26	3_26	1.2957	1.3315	14.6935
3	29	3_29	1.4026	1.4384	15.8732
3	32	3_32	1.5103	1.5465	17.0661
3	35	3_35	1.6182	1.654	18.2524
3	38	3_38	1.7193	1.7553	19.3703
3	41	3_41	1.8271	1.863	20.5588
3	44	3_44	1.9347	1.9706	21.7462
3	48	3_48	2.0773	2.1122	23.3088
3	52	3_52	2.2182	2.2537	24.8703
3	56	3_56	2.3608	2.3966	26.4472
3	62	3_62	2.5742	2.578	28.4491
3	66	3_66	3.8359	3.8452	42.433
3	67	3_67	5.362	5.418	59.7894
3	68	3_68	5.8411	5.8909	65.008
3	69	3_69	6.4581	6.5015	71.7461
3	70	3_70	8.617	8.6636	95.6056
3	71	3_71	11.8503	11.8963	131.279
3	72	3_72	12.7425	12.9248	142.629
3	73	3_73	14.669	14.7181	162.419
3	74	3_74	15.7615	15.8089	174.456
3	75	3_75	17.7259	17.7819	196.229
4	1	4_1	0	0.018	0.183646
4	2	4_2	0.018	0.038	0.387697
4	3	4_3	0.038	0.0471	0.48054
4	4	4_4	0.0471	0.0771	0.786616
4	5	4_5	0.0771	0.1063	1.08453
4	6	4_6	0.1063	0.1357	1.38448
4	7	4_7	0.1357	0.165	1.68342
4	8	4_8	0.165	0.1966	2.00582
4	9	4_9	0.1966	0.2256	2.30169
4	10	4_10	0.2256	0.2545	2.59655
4	11	4_11	0.2545	0.284	2.89752
4	12	4_12	0.284	0.3139	3.20258
4	13	4_13	0.3139	0.3427	3.49641
4	15	4_15	0.3994	0.4315	4.4024
4	17	4_17	0.4886	0.5125	5.2288
4	19	4_19	0.5698	0.5991	6.11234
4	20	4_20	0.5991	0.6282	6.40924
4	23	4_23	0.6865	0.7157	7.30196
4	26	4_26	0.7744	0.8034	8.19672
4	29	4_29	0.8619	0.8911	9.09148
4	32	4_32	0.95	0.9794	9.99237
4	35	4_35	1.0378	1.0671	10.8871
4	38	4_38	1.1258	1.1552	11.786
4	41	4_41	1.2135	1.2429	12.6807
4	44	4_44	1.3017	1.331	13.5796
4	48	4_48	1.4173	1.446	14.7529
4	52	4_52	1.5333	1.5624	15.9404
4	56	4_56	1.6503	1.6792	17.1321
4	61	4_61	1.7963	1.8256	18.6258
4	65	4_65	2.5096	2.5371	25.8849
4	66	4_66	2.858	2.8657	29.2374
4	67	4_67	4.1104	4.1564	42.4058
4	68	4_68	4.5036	4.5446	46.3665
4	69	4_69	5.01	5.0452	51.4739
4	70	4_70	6.7812	6.8306	69.6895
4	71	4_71	9.4457	9.4835	96.7558
4	72	4_72	10.1779	10.3275	105.367
4	73	4_73	11.7588	11.8017	120.407
4	74	4_74	12.6578	12.6994	129.566
4	75	4_75	14.2725	14.3214	146.115
13	1	13_1	0	0.0206	0.209266
13	2	13_2	0.0206	0.043	0.436818
13	3	13_3	0.043	0.0687	0.697893
13	4	13_4	0.0687	0.0912	0.92646
13	5	13_5	0.0912	0.1136	1.15401
13	6	13_6	0.1136	0.1361	1.38258
13	7	13_7	0.1361	0.1584	1.60912
13	8	13_8	0.1584	0.1805	1.83362
13	9	13_9	0.1805	0.2028	2.06015
13	10	13_10	0.2028	0.2253	2.28872
13	11	13_11	0.2253	0.2477	2.51627
13	12	13_12	0.2477	0.2702	2.74484
13	13	13_13	0.2702	0.292	2.9663
13	14	13_14	0.292	0.3144	3.19385
13	15	13_15	0.3144	0.3368	3.4214
13	16	13_16	0.3368	0.3593	3.64997
13	17	13_17	0.3593	0.3817	3.87752
13	18	13_18	0.3817	0.4042	4.10609
13	19	13_19	0.4042	0.4267	4.33466
13	20	13_20	0.4267	0.4492	4.56322
13	21	13_21	0.4895	0.5298	5.382
13	22	13_22	0.5703	0.6109	6.20586
13	23	13_23	0.6514	0.6919	7.0287
13	24	13_24	0.7326	0.7732	7.85459
13	25	13_25	0.8137	0.8542	8.67744
13	26	13_26	0.8947	0.9352	9.50028
13	27	13_27	0.9755	1.0159	10.3201
13	28	13_28	1.0565	1.0971	11.145
13	29	13_29	1.1378	1.1785	11.9719
13	30	13_30	1.2193	1.2601	12.8008
13	31	13_31	1.3004	1.3408	13.6206
13	32	13_32	1.3811	1.4214	14.4394
13	33	13_33	1.4622	1.5029	15.2673
13	34	13_34	1.5432	1.5835	16.0861
13	35	13_35	1.6242	1.6649	16.913
13	36	13_36	1.7058	1.7466	17.7429
13	37	13_37	2.0394	2.0662	20.9896
13	38	13_38	2.359	2.3847	24.2251
13	39	13_39	2.8509	2.877	29.2262
13	40	13_40	3.1778	3.1958	32.4647
13	41	13_41	3.5015	3.5203	35.7612
13	42	13_42	3.9894	4.0111	40.747
13	43	13_43	4.3075	4.3403	44.0912
13	44	13_44	5.12	5.1441	52.2566
13	46	13_46	6.5789	6.6027	67.0739
13	47	13_47	7.5853	7.6048	77.2538
13	48	13_48	8.0386	8.0639	81.9176
13	49	13_49	8.8968	8.9165	90.5788
13	50	13_50	9.6635	9.6775	98.3094
13	51	13_51	10.3192	10.3388	105.027
13	52	13_52	11.1351	11.1577	113.346
13	53	13_53	11.927	11.9412	121.305
14	1	14_1	0	0.032	0.488264
14	2	14_2	0.032	0.0584	0.891081
14	3	14_3	0.0584	0.0848	1.2939
14	4	14_4	0.0848	0.1112	1.69672
14	5	14_5	0.1112	0.1375	2.09801
14	6	14_6	0.1375	0.1636	2.49625
14	7	14_7	0.1636	0.1897	2.89449
14	8	14_8	0.1897	0.216	3.29578
14	9	14_9	0.216	0.2422	3.69554
14	10	14_10	0.2422	0.2686	4.09836
14	11	14_11	0.2686	0.2949	4.49965
14	12	14_12	0.2949	0.3212	4.90095
14	13	14_13	0.3212	0.3475	5.30224
14	14	14_14	0.3475	0.3738	5.70353
14	15	14_15	0.3738	0.4001	6.10482
14	16	14_16	0.4001	0.4264	6.50611
14	17	14_17	0.4264	0.4528	6.90893
14	18	14_18	0.4528	0.4791	7.31022
14	19	14_19	0.4791	0.5055	7.71304
14	20	14_20	0.5055	0.532	8.11738
14	21	14_21	0.5792	0.6265	9.55928
14	22	14_22	0.674	0.7216	11.0103
14	23	14_23	0.7692	0.8167	12.4614
14	24	14_24	0.8644	0.9122	13.9186
14	25	14_25	0.9596	1.007	15.365
14	26	14_26	1.0546	1.1022	16.8176
14	27	14_27	1.1497	1.1972	18.2672
14	28	14_28	1.2448	1.2925	19.7213
14	29	14_29	1.3402	1.3879	21.1769
14	30	14_30	1.4358	1.4837	22.6386
14	31	14_31	1.531	1.5784	24.0836
14	32	14_32	1.6259	1.6735	25.5347
14	33	14_33	1.7213	1.7691	26.9933
14	34	14_34	1.8165	1.864	28.4413
14	35	14_35	1.9118	1.9596	29.9
14	36	14_36	2.0076	2.0556	31.3648
14	37	14_37	2.3994	2.4307	37.0882
14	38	14_38	2.7745	2.8048	42.7963
14	39	14_39	3.3523	3.3829	51.6171
14	40	14_40	3.7362	3.7574	57.3313
14	41	14_41	4.1163	4.1448	63.2423
14	42	14_42	4.6957	4.721	72.0341
14	43	14_43	5.0691	5.1074	77.9299
14	44	14_44	6.0231	6.0511	92.3291
14	46	14_46	7.7361	7.7639	118.463
14	47	14_47	8.9178	8.9408	136.421
14	48	14_48	9.4502	9.4796	144.642
14	49	14_49	10.4578	10.4806	159.915
14	50	14_50	11.3579	11.3741	173.549
14	51	14_51	12.1277	12.1503	185.392
14	52	14_52	13.0842	13.1103	200.04
14	53	14_53	14.0151	14.0316	214.097
17	1	17_1	0	0.0273	0.324916
17	2	17_2	0.0273	0.0528	0.628409
17	3	17_3	0.0528	0.0785	0.934282
17	4	17_4	0.0785	0.1044	1.24254
17	5	17_5	0.1044	0.1303	1.55079
17	6	17_6	0.1303	0.1562	1.85904
17	7	17_7	0.1562	0.1818	2.16373
17	8	17_8	0.1818	0.2076	2.47079
17	9	17_9	0.2076	0.2332	2.77547
17	10	17_10	0.2332	0.2589	3.08135
17	11	17_11	0.2589	0.2847	3.38841
17	12	17_12	0.2847	0.3106	3.69666
17	13	17_13	0.3106	0.3365	4.00492
17	14	17_14	0.3365	0.3621	4.3096
17	15	17_15	0.3621	0.3878	4.61547
17	16	17_16	0.3878	0.4136	4.92254
17	17	17_17	0.4136	0.4393	5.22841
17	18	17_18	0.4393	0.465	5.53428
17	19	17_19	0.465	0.4908	5.84135
17	20	17_20	0.4908	0.5167	6.1496
17	21	17_21	0.563	0.6094	7.25289
17	22	17_22	0.6559	0.7025	8.36093
17	23	17_23	0.749	0.7956	9.46898
17	24	17_24	0.8422	0.8889	10.5794
17	25	17_25	0.9352	0.9816	11.6827
17	26	17_26	1.0279	1.0742	12.7848
17	27	17_27	1.1206	1.1671	13.8905
17	28	17_28	1.2137	1.2604	15.0009
17	29	17_29	1.3066	1.3529	16.1018
17	30	17_30	1.3993	1.4458	17.2075
17	31	17_31	1.492	1.5382	18.3072
17	32	17_32	1.5849	1.6317	19.42
17	33	17_33	1.6784	1.7252	20.5328
17	34	17_34	1.7715	1.8178	21.6349
17	35	17_35	1.8643	1.9108	22.7417
17	36	17_36	1.9574	2.004	23.851
17	37	17_37	2.3397	2.37	28.207
17	38	17_38	2.7057	2.7354	32.5559
17	39	17_39	3.2699	3.2996	39.2708
17	40	17_40	3.6444	3.6651	43.6209
17	41	17_41	4.0155	4.043	48.1185
17	42	17_42	4.5807	4.605	54.8073
17	43	17_43	4.9448	4.9822	59.2966
17	44	17_44	5.876	5.9036	70.2628
17	46	17_46	7.5484	7.5756	90.1624
17	47	17_47	8.7021	8.7245	103.836
17	48	17_48	9.2218	9.251	110.102
17	49	17_49	10.2058	10.2288	121.74
17	50	17_50	11.0852	11.1012	132.123
17	51	17_51	11.8369	11.8591	141.143
17	52	17_52	12.774	12.7996	152.337
17	53	17_53	13.6795	13.6957	163.002
18	1	18_1	0	0.0285	0.362226
18	2	18_2	0.0285	0.054	0.686323
18	3	18_3	0.054	0.0797	1.01296
18	4	18_4	0.0797	0.1054	1.3396
18	5	18_5	0.1054	0.1312	1.66751
18	6	18_6	0.1312	0.157	1.99542
18	7	18_7	0.157	0.1826	2.32079
18	8	18_8	0.1826	0.2084	2.6487
18	9	18_9	0.2084	0.2341	2.97534
18	10	18_10	0.2341	0.2598	3.30198
18	11	18_11	0.2598	0.2856	3.62988
18	12	18_12	0.2856	0.3116	3.96034
18	13	18_13	0.3116	0.3375	4.28952
18	14	18_14	0.3375	0.3631	4.61489
18	15	18_15	0.3631	0.389	4.94407
18	16	18_16	0.389	0.4149	5.27325
18	17	18_17	0.4149	0.4407	5.60116
18	18	18_18	0.4407	0.4665	5.92907
18	19	18_19	0.4665	0.4924	6.25825
18	20	18_20	0.4924	0.5183	6.58743
18	21	18_21	0.5637	0.6092	7.74274
18	22	18_22	0.656	0.7029	8.93363
18	23	18_23	0.7478	0.7927	10.075
18	24	18_24	0.8394	0.886	11.2608
18	25	18_25	0.9295	0.973	12.3665
18	26	18_26	1.016	1.0589	13.4583
18	27	18_27	1.0963	1.1336	14.4077
18	28	18_28	1.1723	1.2109	15.3902
18	29	18_29	1.2559	1.3008	16.5328
18	30	18_30	1.3462	1.3917	17.6881
18	31	18_31	1.437	1.4823	18.8396
18	32	18_32	1.528	1.5738	20.0025
18	33	18_33	1.6198	1.6658	21.1718
18	34	18_34	1.7114	1.757	22.3309
18	35	18_35	1.8026	1.8482	23.49
18	36	18_36	1.8941	1.9399	24.6555
18	37	18_37	2.2607	2.2893	29.0963
18	38	18_38	2.6101	2.6372	33.518
18	39	18_39	3.1481	3.1757	40.3621
18	40	18_40	3.5053	3.5245	44.7953
18	41	18_41	3.8594	3.8854	49.3822
18	42	18_42	4.3993	4.4203	56.1806
18	43	18_43	4.7451	4.7811	60.7663
18	44	18_44	5.6354	5.6621	71.9635
18	46	18_46	7.2343	7.2607	92.2812
18	47	18_47	8.3374	8.3599	106.252
18	48	18_48	8.8352	8.8647	112.668
18	49	18_49	9.7774	9.8001	124.556
18	50	18_50	10.6186	10.635	135.167
18	51	18_51	11.3382	11.361	144.395
18	52	18_52	12.2373	12.2638	155.869
18	53	18_53	13.103	13.1197	166.747
3	1	3_1	0	0.0239	0.263744
3	2	3_2	0.0239	0.0409	0.451345
3	3	3_3	0.0409	0.0613	0.676465
3	4	3_4	0.0613	0.0761	0.839788
3	5	3_5	0.0761	0.1125	1.24147
3	6	3_6	0.1125	0.1483	1.63654
3	7	3_7	0.1483	0.1841	2.0316
3	8	3_8	0.1841	0.22	2.42777
3	9	3_9	0.22	0.2585	2.85263
3	10	3_10	0.2585	0.2939	3.24328
3	11	3_11	0.2939	0.3292	3.63283
3	12	3_12	0.3292	0.3646	4.02348
3	13	3_13	0.3646	0.3813	4.20777
3	14	3_14	0.3813	0.4165	4.59621
3	16	3_16	0.592	0.6316	6.96991
3	18	3_18	0.8747	0.9037	9.97262
3	20	3_20	1.081	1.1168	12.3242
3	23	3_23	1.1881	1.2238	13.505
3	26	3_26	1.2957	1.3315	14.6935
3	29	3_29	1.4026	1.4384	15.8732
3	32	3_32	1.5103	1.5465	17.0661
3	35	3_35	1.6182	1.654	18.2524
3	38	3_38	1.7193	1.7553	19.3703
3	41	3_41	1.8271	1.863	20.5588
3	44	3_44	1.9347	1.9706	21.7462
3	48	3_48	2.0773	2.1122	23.3088
3	52	3_52	2.2182	2.2537	24.8703
3	56	3_56	2.3608	2.3966	26.4472
3	62	3_62	2.5742	2.578	28.4491
3	66	3_66	3.8359	3.8452	42.433
3	67	3_67	5.362	5.418	59.7894
3	68	3_68	5.8411	5.8909	65.008
3	69	3_69	6.4581	6.5015	71.7461
3	70	3_70	8.617	8.6636	95.6056
3	71	3_71	11.8503	11.8963	131.279
3	72	3_72	12.7425	12.9248	142.629
3	73	3_73	14.669	14.7181	162.419
3	74	3_74	15.7615	15.8089	174.456
3	75	3_75	17.7259	17.7819	196.229
4	1	4_1	0	0.018	0.183646
4	2	4_2	0.018	0.038	0.387697
4	3	4_3	0.038	0.0471	0.48054
4	4	4_4	0.0471	0.0771	0.786616
4	5	4_5	0.0771	0.1063	1.08453
4	6	4_6	0.1063	0.1357	1.38448
4	7	4_7	0.1357	0.165	1.68342
4	8	4_8	0.165	0.1966	2.00582
4	9	4_9	0.1966	0.2256	2.30169
4	10	4_10	0.2256	0.2545	2.59655
4	11	4_11	0.2545	0.284	2.89752
4	12	4_12	0.284	0.3139	3.20258
4	13	4_13	0.3139	0.3427	3.49641
4	15	4_15	0.3994	0.4315	4.4024
4	17	4_17	0.4886	0.5125	5.2288
4	19	4_19	0.5698	0.5991	6.11234
4	20	4_20	0.5991	0.6282	6.40924
4	23	4_23	0.6865	0.7157	7.30196
4	26	4_26	0.7744	0.8034	8.19672
4	29	4_29	0.8619	0.8911	9.09148
4	32	4_32	0.95	0.9794	9.99237
4	35	4_35	1.0378	1.0671	10.8871
4	38	4_38	1.1258	1.1552	11.786
4	41	4_41	1.2135	1.2429	12.6807
4	44	4_44	1.3017	1.331	13.5796
4	48	4_48	1.4173	1.446	14.7529
4	52	4_52	1.5333	1.5624	15.9404
4	56	4_56	1.6503	1.6792	17.1321
4	61	4_61	1.7963	1.8256	18.6258
4	65	4_65	2.5096	2.5371	25.8849
4	66	4_66	2.858	2.8657	29.2374
4	67	4_67	4.1104	4.1564	42.4058
4	68	4_68	4.5036	4.5446	46.3665
4	69	4_69	5.01	5.0452	51.4739
4	70	4_70	6.7812	6.8306	69.6895
4	71	4_71	9.4457	9.4835	96.7558
4	72	4_72	10.1779	10.3275	105.367
4	73	4_73	11.7588	11.8017	120.407
4	74	4_74	12.6578	12.6994	129.566
4	75	4_75	14.2725	14.3214	146.115
13	1	13_1	0	0.0206	0.209266
13	2	13_2	0.0206	0.043	0.436818
13	3	13_3	0.043	0.0687	0.697893
13	4	13_4	0.0687	0.0912	0.92646
13	5	13_5	0.0912	0.1136	1.15401
13	6	13_6	0.1136	0.1361	1.38258
13	7	13_7	0.1361	0.1584	1.60912
13	8	13_8	0.1584	0.1805	1.83362
13	9	13_9	0.1805	0.2028	2.06015
13	10	13_10	0.2028	0.2253	2.28872
13	11	13_11	0.2253	0.2477	2.51627
13	12	13_12	0.2477	0.2702	2.74484
13	13	13_13	0.2702	0.292	2.9663
13	14	13_14	0.292	0.3144	3.19385
13	15	13_15	0.3144	0.3368	3.4214
13	16	13_16	0.3368	0.3593	3.64997
13	17	13_17	0.3593	0.3817	3.87752
13	18	13_18	0.3817	0.4042	4.10609
13	19	13_19	0.4042	0.4267	4.33466
13	20	13_20	0.4267	0.4492	4.56322
13	21	13_21	0.4895	0.5298	5.382
13	22	13_22	0.5703	0.6109	6.20586
13	23	13_23	0.6514	0.6919	7.0287
13	24	13_24	0.7326	0.7732	7.85459
13	25	13_25	0.8137	0.8542	8.67744
13	26	13_26	0.8947	0.9352	9.50028
13	27	13_27	0.9755	1.0159	10.3201
13	28	13_28	1.0565	1.0971	11.145
13	29	13_29	1.1378	1.1785	11.9719
13	30	13_30	1.2193	1.2601	12.8008
13	31	13_31	1.3004	1.3408	13.6206
13	32	13_32	1.3811	1.4214	14.4394
13	33	13_33	1.4622	1.5029	15.2673
13	34	13_34	1.5432	1.5835	16.0861
13	35	13_35	1.6242	1.6649	16.913
13	36	13_36	1.7058	1.7466	17.7429
13	37	13_37	2.0394	2.0662	20.9896
13	38	13_38	2.359	2.3847	24.2251
13	39	13_39	2.8509	2.877	29.2262
13	40	13_40	3.1778	3.1958	32.4647
13	41	13_41	3.5015	3.5203	35.7612
13	42	13_42	3.9894	4.0111	40.747
13	43	13_43	4.3075	4.3403	44.0912
13	44	13_44	5.12	5.1441	52.2566
13	46	13_46	6.5789	6.6027	67.0739
13	47	13_47	7.5853	7.6048	77.2538
13	48	13_48	8.0386	8.0639	81.9176
13	49	13_49	8.8968	8.9165	90.5788
13	50	13_50	9.6635	9.6775	98.3094
13	51	13_51	10.3192	10.3388	105.027
13	52	13_52	11.1351	11.1577	113.346
13	53	13_53	11.927	11.9412	121.305
14	1	14_1	0	0.032	0.488264
14	2	14_2	0.032	0.0584	0.891081
14	3	14_3	0.0584	0.0848	1.2939
14	4	14_4	0.0848	0.1112	1.69672
14	5	14_5	0.1112	0.1375	2.09801
14	6	14_6	0.1375	0.1636	2.49625
14	7	14_7	0.1636	0.1897	2.89449
14	8	14_8	0.1897	0.216	3.29578
14	9	14_9	0.216	0.2422	3.69554
14	10	14_10	0.2422	0.2686	4.09836
14	11	14_11	0.2686	0.2949	4.49965
14	12	14_12	0.2949	0.3212	4.90095
14	13	14_13	0.3212	0.3475	5.30224
14	14	14_14	0.3475	0.3738	5.70353
14	15	14_15	0.3738	0.4001	6.10482
14	16	14_16	0.4001	0.4264	6.50611
14	17	14_17	0.4264	0.4528	6.90893
14	18	14_18	0.4528	0.4791	7.31022
14	19	14_19	0.4791	0.5055	7.71304
14	20	14_20	0.5055	0.532	8.11738
14	21	14_21	0.5792	0.6265	9.55928
14	22	14_22	0.674	0.7216	11.0103
14	23	14_23	0.7692	0.8167	12.4614
14	24	14_24	0.8644	0.9122	13.9186
14	25	14_25	0.9596	1.007	15.365
14	26	14_26	1.0546	1.1022	16.8176
14	27	14_27	1.1497	1.1972	18.2672
14	28	14_28	1.2448	1.2925	19.7213
14	29	14_29	1.3402	1.3879	21.1769
14	30	14_30	1.4358	1.4837	22.6386
14	31	14_31	1.531	1.5784	24.0836
14	32	14_32	1.6259	1.6735	25.5347
14	33	14_33	1.7213	1.7691	26.9933
14	34	14_34	1.8165	1.864	28.4413
14	35	14_35	1.9118	1.9596	29.9
14	36	14_36	2.0076	2.0556	31.3648
14	37	14_37	2.3994	2.4307	37.0882
14	38	14_38	2.7745	2.8048	42.7963
14	39	14_39	3.3523	3.3829	51.6171
14	40	14_40	3.7362	3.7574	57.3313
14	41	14_41	4.1163	4.1448	63.2423
14	42	14_42	4.6957	4.721	72.0341
14	43	14_43	5.0691	5.1074	77.9299
14	44	14_44	6.0231	6.0511	92.3291
14	46	14_46	7.7361	7.7639	118.463
14	47	14_47	8.9178	8.9408	136.421
14	48	14_48	9.4502	9.4796	144.642
14	49	14_49	10.4578	10.4806	159.915
14	50	14_50	11.3579	11.3741	173.549
14	51	14_51	12.1277	12.1503	185.392
14	52	14_52	13.0842	13.1103	200.04
14	53	14_53	14.0151	14.0316	214.097
17	1	17_1	0	0.0273	0.324916
17	2	17_2	0.0273	0.0528	0.628409
17	3	17_3	0.0528	0.0785	0.934282
17	4	17_4	0.0785	0.1044	1.24254
17	5	17_5	0.1044	0.1303	1.55079
17	6	17_6	0.1303	0.1562	1.85904
17	7	17_7	0.1562	0.1818	2.16373
17	8	17_8	0.1818	0.2076	2.47079
17	9	17_9	0.2076	0.2332	2.77547
17	10	17_10	0.2332	0.2589	3.08135
17	11	17_11	0.2589	0.2847	3.38841
17	12	17_12	0.2847	0.3106	3.69666
17	13	17_13	0.3106	0.3365	4.00492
17	14	17_14	0.3365	0.3621	4.3096
17	15	17_15	0.3621	0.3878	4.61547
17	16	17_16	0.3878	0.4136	4.92254
17	17	17_17	0.4136	0.4393	5.22841
17	18	17_18	0.4393	0.465	5.53428
17	19	17_19	0.465	0.4908	5.84135
17	20	17_20	0.4908	0.5167	6.1496
17	21	17_21	0.563	0.6094	7.25289
17	22	17_22	0.6559	0.7025	8.36093
17	23	17_23	0.749	0.7956	9.46898
17	24	17_24	0.8422	0.8889	10.5794
17	25	17_25	0.9352	0.9816	11.6827
17	26	17_26	1.0279	1.0742	12.7848
17	27	17_27	1.1206	1.1671	13.8905
17	28	17_28	1.2137	1.2604	15.0009
17	29	17_29	1.3066	1.3529	16.1018
17	30	17_30	1.3993	1.4458	17.2075
17	31	17_31	1.492	1.5382	18.3072
17	32	17_32	1.5849	1.6317	19.42
17	33	17_33	1.6784	1.7252	20.5328
17	34	17_34	1.7715	1.8178	21.6349
17	35	17_35	1.8643	1.9108	22.7417
17	36	17_36	1.9574	2.004	23.851
17	37	17_37	2.3397	2.37	28.207
17	38	17_38	2.7057	2.7354	32.5559
17	39	17_39	3.2699	3.2996	39.2708
17	40	17_40	3.6444	3.6651	43.6209
17	41	17_41	4.0155	4.043	48.1185
17	42	17_42	4.5807	4.605	54.8073
17	43	17_43	4.9448	4.9822	59.2966
17	44	17_44	5.876	5.9036	70.2628
17	46	17_46	7.5484	7.5756	90.1624
17	47	17_47	8.7021	8.7245	103.836
17	48	17_48	9.2218	9.251	110.102
17	49	17_49	10.2058	10.2288	121.74
17	50	17_50	11.0852	11.1012	132.123
17	51	17_51	11.8369	11.8591	141.143
17	52	17_52	12.774	12.7996	152.337
17	53	17_53	13.6795	13.6957	163.002
18	1	18_1	0	0.0285	0.362226
18	2	18_2	0.0285	0.054	0.686323
18	3	18_3	0.054	0.0797	1.01296
18	4	18_4	0.0797	0.1054	1.3396
18	5	18_5	0.1054	0.1312	1.66751
18	6	18_6	0.1312	0.157	1.99542
18	7	18_7	0.157	0.1826	2.32079
18	8	18_8	0.1826	0.2084	2.6487
18	9	18_9	0.2084	0.2341	2.97534
18	10	18_10	0.2341	0.2598	3.30198
18	11	18_11	0.2598	0.2856	3.62988
18	12	18_12	0.2856	0.3116	3.96034
18	13	18_13	0.3116	0.3375	4.28952
18	14	18_14	0.3375	0.3631	4.61489
18	15	18_15	0.3631	0.389	4.94407
18	16	18_16	0.389	0.4149	5.27325
18	17	18_17	0.4149	0.4407	5.60116
18	18	18_18	0.4407	0.4665	5.92907
18	19	18_19	0.4665	0.4924	6.25825
18	20	18_20	0.4924	0.5183	6.58743
18	21	18_21	0.5637	0.6092	7.74274
18	22	18_22	0.656	0.7029	8.93363
18	23	18_23	0.7478	0.7927	10.075
18	24	18_24	0.8394	0.886	11.2608
18	25	18_25	0.9295	0.973	12.3665
18	26	18_26	1.016	1.0589	13.4583
18	27	18_27	1.0963	1.1336	14.4077
18	28	18_28	1.1723	1.2109	15.3902
18	29	18_29	1.2559	1.3008	16.5328
18	30	18_30	1.3462	1.3917	17.6881
18	31	18_31	1.437	1.4823	18.8396
18	32	18_32	1.528	1.5738	20.0025
18	33	18_33	1.6198	1.6658	21.1718
18	34	18_34	1.7114	1.757	22.3309
18	35	18_35	1.8026	1.8482	23.49
18	36	18_36	1.8941	1.9399	24.6555
18	37	18_37	2.2607	2.2893	29.0963
18	38	18_38	2.6101	2.6372	33.518
18	39	18_39	3.1481	3.1757	40.3621
18	40	18_40	3.5053	3.5245	44.7953
18	41	18_41	3.8594	3.8854	49.3822
18	42	18_42	4.3993	4.4203	56.1806
18	43	18_43	4.7451	4.7811	60.7663
18	44	18_44	5.6354	5.6621	71.9635
18	46	18_46	7.2343	7.2607	92.2812
18	47	18_47	8.3374	8.3599	106.252
18	48	18_48	8.8352	8.8647	112.668
18	49	18_49	9.7774	9.8001	124.556
18	50	18_50	10.6186	10.635	135.167
18	51	18_51	11.3382	11.361	144.395
18	52	18_52	12.2373	12.2638	155.869
18	53	18_53	13.103	13.1197	166.747
3	1	3_1	0	0.0239	0.263744
3	2	3_2	0.0239	0.0409	0.451345
3	3	3_3	0.0409	0.0613	0.676465
3	4	3_4	0.0613	0.0761	0.839788
3	5	3_5	0.0761	0.1125	1.24147
3	6	3_6	0.1125	0.1483	1.63654
3	7	3_7	0.1483	0.1841	2.0316
3	8	3_8	0.1841	0.22	2.42777
3	9	3_9	0.22	0.2585	2.85263
3	10	3_10	0.2585	0.2939	3.24328
3	11	3_11	0.2939	0.3292	3.63283
3	12	3_12	0.3292	0.3646	4.02348
3	13	3_13	0.3646	0.3813	4.20777
3	14	3_14	0.3813	0.4165	4.59621
3	16	3_16	0.592	0.6316	6.96991
3	18	3_18	0.8747	0.9037	9.97262
3	20	3_20	1.081	1.1168	12.3242
3	23	3_23	1.1881	1.2238	13.505
3	26	3_26	1.2957	1.3315	14.6935
3	29	3_29	1.4026	1.4384	15.8732
3	32	3_32	1.5103	1.5465	17.0661
3	35	3_35	1.6182	1.654	18.2524
3	38	3_38	1.7193	1.7553	19.3703
3	41	3_41	1.8271	1.863	20.5588
3	44	3_44	1.9347	1.9706	21.7462
3	48	3_48	2.0773	2.1122	23.3088
3	52	3_52	2.2182	2.2537	24.8703
3	56	3_56	2.3608	2.3966	26.4472
3	62	3_62	2.5742	2.578	28.4491
3	66	3_66	3.8359	3.8452	42.433
3	67	3_67	5.362	5.418	59.7894
3	68	3_68	5.8411	5.8909	65.008
3	69	3_69	6.4581	6.5015	71.7461
3	70	3_70	8.617	8.6636	95.6056
3	71	3_71	11.8503	11.8963	131.279
3	72	3_72	12.7425	12.9248	142.629
3	73	3_73	14.669	14.7181	162.419
3	74	3_74	15.7615	15.8089	174.456
3	75	3_75	17.7259	17.7819	196.229
4	1	4_1	0	0.018	0.183646
4	2	4_2	0.018	0.038	0.387697
4	3	4_3	0.038	0.0471	0.48054
4	4	4_4	0.0471	0.0771	0.786616
4	5	4_5	0.0771	0.1063	1.08453
4	6	4_6	0.1063	0.1357	1.38448
4	7	4_7	0.1357	0.165	1.68342
4	8	4_8	0.165	0.1966	2.00582
4	9	4_9	0.1966	0.2256	2.30169
4	10	4_10	0.2256	0.2545	2.59655
4	11	4_11	0.2545	0.284	2.89752
4	12	4_12	0.284	0.3139	3.20258
4	13	4_13	0.3139	0.3427	3.49641
4	15	4_15	0.3994	0.4315	4.4024
4	17	4_17	0.4886	0.5125	5.2288
4	19	4_19	0.5698	0.5991	6.11234
4	20	4_20	0.5991	0.6282	6.40924
4	23	4_23	0.6865	0.7157	7.30196
4	26	4_26	0.7744	0.8034	8.19672
4	29	4_29	0.8619	0.8911	9.09148
4	32	4_32	0.95	0.9794	9.99237
4	35	4_35	1.0378	1.0671	10.8871
4	38	4_38	1.1258	1.1552	11.786
4	41	4_41	1.2135	1.2429	12.6807
4	44	4_44	1.3017	1.331	13.5796
4	48	4_48	1.4173	1.446	14.7529
4	52	4_52	1.5333	1.5624	15.9404
4	56	4_56	1.6503	1.6792	17.1321
4	61	4_61	1.7963	1.8256	18.6258
4	65	4_65	2.5096	2.5371	25.8849
4	66	4_66	2.858	2.8657	29.2374
4	67	4_67	4.1104	4.1564	42.4058
4	68	4_68	4.5036	4.5446	46.3665
4	69	4_69	5.01	5.0452	51.4739
4	70	4_70	6.7812	6.8306	69.6895
4	71	4_71	9.4457	9.4835	96.7558
4	72	4_72	10.1779	10.3275	105.367
4	73	4_73	11.7588	11.8017	120.407
4	74	4_74	12.6578	12.6994	129.566
4	75	4_75	14.2725	14.3214	146.115
13	1	13_1	0	0.0206	0.209266
13	2	13_2	0.0206	0.043	0.436818
13	3	13_3	0.043	0.0687	0.697893
13	4	13_4	0.0687	0.0912	0.92646
13	5	13_5	0.0912	0.1136	1.15401
13	6	13_6	0.1136	0.1361	1.38258
13	7	13_7	0.1361	0.1584	1.60912
13	8	13_8	0.1584	0.1805	1.83362
13	9	13_9	0.1805	0.2028	2.06015
13	10	13_10	0.2028	0.2253	2.28872
13	11	13_11	0.2253	0.2477	2.51627
13	12	13_12	0.2477	0.2702	2.74484
13	13	13_13	0.2702	0.292	2.9663
13	14	13_14	0.292	0.3144	3.19385
13	15	13_15	0.3144	0.3368	3.4214
13	16	13_16	0.3368	0.3593	3.64997
13	17	13_17	0.3593	0.3817	3.87752
13	18	13_18	0.3817	0.4042	4.10609
13	19	13_19	0.4042	0.4267	4.33466
13	20	13_20	0.4267	0.4492	4.56322
13	21	13_21	0.4895	0.5298	5.382
13	22	13_22	0.5703	0.6109	6.20586
13	23	13_23	0.6514	0.6919	7.0287
13	24	13_24	0.7326	0.7732	7.85459
13	25	13_25	0.8137	0.8542	8.67744
13	26	13_26	0.8947	0.9352	9.50028
13	27	13_27	0.9755	1.0159	10.3201
13	28	13_28	1.0565	1.0971	11.145
13	29	13_29	1.1378	1.1785	11.9719
13	30	13_30	1.2193	1.2601	12.8008
13	31	13_31	1.3004	1.3408	13.6206
13	32	13_32	1.3811	1.4214	14.4394
13	33	13_33	1.4622	1.5029	15.2673
13	34	13_34	1.5432	1.5835	16.0861
13	35	13_35	1.6242	1.6649	16.913
13	36	13_36	1.7058	1.7466	17.7429
13	37	13_37	2.0394	2.0662	20.9896
13	38	13_38	2.359	2.3847	24.2251
13	39	13_39	2.8509	2.877	29.2262
13	40	13_40	3.1778	3.1958	32.4647
13	41	13_41	3.5015	3.5203	35.7612
13	42	13_42	3.9894	4.0111	40.747
13	43	13_43	4.3075	4.3403	44.0912
13	44	13_44	5.12	5.1441	52.2566
13	46	13_46	6.5789	6.6027	67.0739
13	47	13_47	7.5853	7.6048	77.2538
13	48	13_48	8.0386	8.0639	81.9176
13	49	13_49	8.8968	8.9165	90.5788
13	50	13_50	9.6635	9.6775	98.3094
13	51	13_51	10.3192	10.3388	105.027
13	52	13_52	11.1351	11.1577	113.346
13	53	13_53	11.927	11.9412	121.305
14	1	14_1	0	0.032	0.488264
14	2	14_2	0.032	0.0584	0.891081
14	3	14_3	0.0584	0.0848	1.2939
14	4	14_4	0.0848	0.1112	1.69672
14	5	14_5	0.1112	0.1375	2.09801
14	6	14_6	0.1375	0.1636	2.49625
14	7	14_7	0.1636	0.1897	2.89449
14	8	14_8	0.1897	0.216	3.29578
14	9	14_9	0.216	0.2422	3.69554
14	10	14_10	0.2422	0.2686	4.09836
14	11	14_11	0.2686	0.2949	4.49965
14	12	14_12	0.2949	0.3212	4.90095
14	13	14_13	0.3212	0.3475	5.30224
14	14	14_14	0.3475	0.3738	5.70353
14	15	14_15	0.3738	0.4001	6.10482
14	16	14_16	0.4001	0.4264	6.50611
14	17	14_17	0.4264	0.4528	6.90893
14	18	14_18	0.4528	0.4791	7.31022
14	19	14_19	0.4791	0.5055	7.71304
14	20	14_20	0.5055	0.532	8.11738
14	21	14_21	0.5792	0.6265	9.55928
14	22	14_22	0.674	0.7216	11.0103
14	23	14_23	0.7692	0.8167	12.4614
14	24	14_24	0.8644	0.9122	13.9186
14	25	14_25	0.9596	1.007	15.365
14	26	14_26	1.0546	1.1022	16.8176
14	27	14_27	1.1497	1.1972	18.2672
14	28	14_28	1.2448	1.2925	19.7213
14	29	14_29	1.3402	1.3879	21.1769
14	30	14_30	1.4358	1.4837	22.6386
14	31	14_31	1.531	1.5784	24.0836
14	32	14_32	1.6259	1.6735	25.5347
14	33	14_33	1.7213	1.7691	26.9933
14	34	14_34	1.8165	1.864	28.4413
14	35	14_35	1.9118	1.9596	29.9
14	36	14_36	2.0076	2.0556	31.3648
14	37	14_37	2.3994	2.4307	37.0882
14	38	14_38	2.7745	2.8048	42.7963
14	39	14_39	3.3523	3.3829	51.6171
14	40	14_40	3.7362	3.7574	57.3313
14	41	14_41	4.1163	4.1448	63.2423
14	42	14_42	4.6957	4.721	72.0341
14	43	14_43	5.0691	5.1074	77.9299
14	44	14_44	6.0231	6.0511	92.3291
14	46	14_46	7.7361	7.7639	118.463
14	47	14_47	8.9178	8.9408	136.421
14	48	14_48	9.4502	9.4796	144.642
14	49	14_49	10.4578	10.4806	159.915
14	50	14_50	11.3579	11.3741	173.549
14	51	14_51	12.1277	12.1503	185.392
14	52	14_52	13.0842	13.1103	200.04
14	53	14_53	14.0151	14.0316	214.097
17	1	17_1	0	0.0273	0.324916
17	2	17_2	0.0273	0.0528	0.628409
17	3	17_3	0.0528	0.0785	0.934282
17	4	17_4	0.0785	0.1044	1.24254
17	5	17_5	0.1044	0.1303	1.55079
17	6	17_6	0.1303	0.1562	1.85904
17	7	17_7	0.1562	0.1818	2.16373
17	8	17_8	0.1818	0.2076	2.47079
17	9	17_9	0.2076	0.2332	2.77547
17	10	17_10	0.2332	0.2589	3.08135
17	11	17_11	0.2589	0.2847	3.38841
17	12	17_12	0.2847	0.3106	3.69666
17	13	17_13	0.3106	0.3365	4.00492
17	14	17_14	0.3365	0.3621	4.3096
17	15	17_15	0.3621	0.3878	4.61547
17	16	17_16	0.3878	0.4136	4.92254
17	17	17_17	0.4136	0.4393	5.22841
17	18	17_18	0.4393	0.465	5.53428
17	19	17_19	0.465	0.4908	5.84135
17	20	17_20	0.4908	0.5167	6.1496
17	21	17_21	0.563	0.6094	7.25289
17	22	17_22	0.6559	0.7025	8.36093
17	23	17_23	0.749	0.7956	9.46898
17	24	17_24	0.8422	0.8889	10.5794
17	25	17_25	0.9352	0.9816	11.6827
17	26	17_26	1.0279	1.0742	12.7848
17	27	17_27	1.1206	1.1671	13.8905
17	28	17_28	1.2137	1.2604	15.0009
17	29	17_29	1.3066	1.3529	16.1018
17	30	17_30	1.3993	1.4458	17.2075
17	31	17_31	1.492	1.5382	18.3072
17	32	17_32	1.5849	1.6317	19.42
17	33	17_33	1.6784	1.7252	20.5328
17	34	17_34	1.7715	1.8178	21.6349
17	35	17_35	1.8643	1.9108	22.7417
17	36	17_36	1.9574	2.004	23.851
17	37	17_37	2.3397	2.37	28.207
17	38	17_38	2.7057	2.7354	32.5559
17	39	17_39	3.2699	3.2996	39.2708
17	40	17_40	3.6444	3.6651	43.6209
17	41	17_41	4.0155	4.043	48.1185
17	42	17_42	4.5807	4.605	54.8073
17	43	17_43	4.9448	4.9822	59.2966
17	44	17_44	5.876	5.9036	70.2628
17	46	17_46	7.5484	7.5756	90.1624
17	47	17_47	8.7021	8.7245	103.836
17	48	17_48	9.2218	9.251	110.102
17	49	17_49	10.2058	10.2288	121.74
17	50	17_50	11.0852	11.1012	132.123
17	51	17_51	11.8369	11.8591	141.143
17	52	17_52	12.774	12.7996	152.337
17	53	17_53	13.6795	13.6957	163.002
18	1	18_1	0	0.0285	0.362226
18	2	18_2	0.0285	0.054	0.686323
18	3	18_3	0.054	0.0797	1.01296
18	4	18_4	0.0797	0.1054	1.3396
18	5	18_5	0.1054	0.1312	1.66751
18	6	18_6	0.1312	0.157	1.99542
18	7	18_7	0.157	0.1826	2.32079
18	8	18_8	0.1826	0.2084	2.6487
18	9	18_9	0.2084	0.2341	2.97534
18	10	18_10	0.2341	0.2598	3.30198
18	11	18_11	0.2598	0.2856	3.62988
18	12	18_12	0.2856	0.3116	3.96034
18	13	18_13	0.3116	0.3375	4.28952
18	14	18_14	0.3375	0.3631	4.61489
18	15	18_15	0.3631	0.389	4.94407
18	16	18_16	0.389	0.4149	5.27325
18	17	18_17	0.4149	0.4407	5.60116
18	18	18_18	0.4407	0.4665	5.92907
18	19	18_19	0.4665	0.4924	6.25825
18	20	18_20	0.4924	0.5183	6.58743
18	21	18_21	0.5637	0.6092	7.74274
18	22	18_22	0.656	0.7029	8.93363
18	23	18_23	0.7478	0.7927	10.075
18	24	18_24	0.8394	0.886	11.2608
18	25	18_25	0.9295	0.973	12.3665
18	26	18_26	1.016	1.0589	13.4583
18	27	18_27	1.0963	1.1336	14.4077
18	28	18_28	1.1723	1.2109	15.3902
18	29	18_29	1.2559	1.3008	16.5328
18	30	18_30	1.3462	1.3917	17.6881
18	31	18_31	1.437	1.4823	18.8396
18	32	18_32	1.528	1.5738	20.0025
18	33	18_33	1.6198	1.6658	21.1718
18	34	18_34	1.7114	1.757	22.3309
18	35	18_35	1.8026	1.8482	23.49
18	36	18_36	1.8941	1.9399	24.6555
18	37	18_37	2.2607	2.2893	29.0963
18	38	18_38	2.6101	2.6372	33.518
18	39	18_39	3.1481	3.1757	40.3621
18	40	18_40	3.5053	3.5245	44.7953
18	41	18_41	3.8594	3.8854	49.3822
18	42	18_42	4.3993	4.4203	56.1806
18	43	18_43	4.7451	4.7811	60.7663
18	44	18_44	5.6354	5.6621	71.9635
18	46	18_46	7.2343	7.2607	92.2812
18	47	18_47	8.3374	8.3599	106.252
18	48	18_48	8.8352	8.8647	112.668
18	49	18_49	9.7774	9.8001	124.556
18	50	18_50	10.6186	10.635	135.167
18	51	18_51	11.3382	11.361	144.395
18	52	18_52	12.2373	12.2638	155.869
18	53	18_53	13.103	13.1197	166.747
3	1	3_1	0	0.0239	0.263744
3	2	3_2	0.0239	0.0409	0.451345
3	3	3_3	0.0409	0.0613	0.676465
3	4	3_4	0.0613	0.0761	0.839788
3	5	3_5	0.0761	0.1125	1.24147
3	6	3_6	0.1125	0.1483	1.63654
3	7	3_7	0.1483	0.1841	2.0316
3	8	3_8	0.1841	0.22	2.42777
3	9	3_9	0.22	0.2585	2.85263
3	10	3_10	0.2585	0.2939	3.24328
3	11	3_11	0.2939	0.3292	3.63283
3	12	3_12	0.3292	0.3646	4.02348
3	13	3_13	0.3646	0.3813	4.20777
3	14	3_14	0.3813	0.4165	4.59621
3	16	3_16	0.592	0.6316	6.96991
3	18	3_18	0.8747	0.9037	9.97262
3	20	3_20	1.081	1.1168	12.3242
3	23	3_23	1.1881	1.2238	13.505
3	26	3_26	1.2957	1.3315	14.6935
3	29	3_29	1.4026	1.4384	15.8732
3	32	3_32	1.5103	1.5465	17.0661
3	35	3_35	1.6182	1.654	18.2524
3	38	3_38	1.7193	1.7553	19.3703
3	41	3_41	1.8271	1.863	20.5588
3	44	3_44	1.9347	1.9706	21.7462
3	48	3_48	2.0773	2.1122	23.3088
3	52	3_52	2.2182	2.2537	24.8703
3	56	3_56	2.3608	2.3966	26.4472
3	62	3_62	2.5742	2.578	28.4491
3	66	3_66	3.8359	3.8452	42.433
3	67	3_67	5.362	5.418	59.7894
3	68	3_68	5.8411	5.8909	65.008
3	69	3_69	6.4581	6.5015	71.7461
3	70	3_70	8.617	8.6636	95.6056
3	71	3_71	11.8503	11.8963	131.279
3	72	3_72	12.7425	12.9248	142.629
3	73	3_73	14.669	14.7181	162.419
3	74	3_74	15.7615	15.8089	174.456
3	75	3_75	17.7259	17.7819	196.229
4	1	4_1	0	0.018	0.183646
4	2	4_2	0.018	0.038	0.387697
4	3	4_3	0.038	0.0471	0.48054
4	4	4_4	0.0471	0.0771	0.786616
4	5	4_5	0.0771	0.1063	1.08453
4	6	4_6	0.1063	0.1357	1.38448
4	7	4_7	0.1357	0.165	1.68342
4	8	4_8	0.165	0.1966	2.00582
4	9	4_9	0.1966	0.2256	2.30169
4	10	4_10	0.2256	0.2545	2.59655
4	11	4_11	0.2545	0.284	2.89752
4	12	4_12	0.284	0.3139	3.20258
4	13	4_13	0.3139	0.3427	3.49641
4	15	4_15	0.3994	0.4315	4.4024
4	17	4_17	0.4886	0.5125	5.2288
4	19	4_19	0.5698	0.5991	6.11234
4	20	4_20	0.5991	0.6282	6.40924
4	23	4_23	0.6865	0.7157	7.30196
4	26	4_26	0.7744	0.8034	8.19672
4	29	4_29	0.8619	0.8911	9.09148
4	32	4_32	0.95	0.9794	9.99237
4	35	4_35	1.0378	1.0671	10.8871
4	38	4_38	1.1258	1.1552	11.786
4	41	4_41	1.2135	1.2429	12.6807
4	44	4_44	1.3017	1.331	13.5796
4	48	4_48	1.4173	1.446	14.7529
4	52	4_52	1.5333	1.5624	15.9404
4	56	4_56	1.6503	1.6792	17.1321
4	61	4_61	1.7963	1.8256	18.6258
4	65	4_65	2.5096	2.5371	25.8849
4	66	4_66	2.858	2.8657	29.2374
4	67	4_67	4.1104	4.1564	42.4058
4	68	4_68	4.5036	4.5446	46.3665
4	69	4_69	5.01	5.0452	51.4739
4	70	4_70	6.7812	6.8306	69.6895
4	71	4_71	9.4457	9.4835	96.7558
4	72	4_72	10.1779	10.3275	105.367
4	73	4_73	11.7588	11.8017	120.407
4	74	4_74	12.6578	12.6994	129.566
4	75	4_75	14.2725	14.3214	146.115
13	1	13_1	0	0.0206	0.209266
13	2	13_2	0.0206	0.043	0.436818
13	3	13_3	0.043	0.0687	0.697893
13	4	13_4	0.0687	0.0912	0.92646
13	5	13_5	0.0912	0.1136	1.15401
13	6	13_6	0.1136	0.1361	1.38258
13	7	13_7	0.1361	0.1584	1.60912
13	8	13_8	0.1584	0.1805	1.83362
13	9	13_9	0.1805	0.2028	2.06015
13	10	13_10	0.2028	0.2253	2.28872
13	11	13_11	0.2253	0.2477	2.51627
13	12	13_12	0.2477	0.2702	2.74484
13	13	13_13	0.2702	0.292	2.9663
13	14	13_14	0.292	0.3144	3.19385
13	15	13_15	0.3144	0.3368	3.4214
13	16	13_16	0.3368	0.3593	3.64997
13	17	13_17	0.3593	0.3817	3.87752
13	18	13_18	0.3817	0.4042	4.10609
13	19	13_19	0.4042	0.4267	4.33466
13	20	13_20	0.4267	0.4492	4.56322
13	21	13_21	0.4895	0.5298	5.382
13	22	13_22	0.5703	0.6109	6.20586
13	23	13_23	0.6514	0.6919	7.0287
13	24	13_24	0.7326	0.7732	7.85459
13	25	13_25	0.8137	0.8542	8.67744
13	26	13_26	0.8947	0.9352	9.50028
13	27	13_27	0.9755	1.0159	10.3201
13	28	13_28	1.0565	1.0971	11.145
13	29	13_29	1.1378	1.1785	11.9719
13	30	13_30	1.2193	1.2601	12.8008
13	31	13_31	1.3004	1.3408	13.6206
13	32	13_32	1.3811	1.4214	14.4394
13	33	13_33	1.4622	1.5029	15.2673
13	34	13_34	1.5432	1.5835	16.0861
13	35	13_35	1.6242	1.6649	16.913
13	36	13_36	1.7058	1.7466	17.7429
13	37	13_37	2.0394	2.0662	20.9896
13	38	13_38	2.359	2.3847	24.2251
13	39	13_39	2.8509	2.877	29.2262
13	40	13_40	3.1778	3.1958	32.4647
13	41	13_41	3.5015	3.5203	35.7612
13	42	13_42	3.9894	4.0111	40.747
13	43	13_43	4.3075	4.3403	44.0912
13	44	13_44	5.12	5.1441	52.2566
13	46	13_46	6.5789	6.6027	67.0739
13	47	13_47	7.5853	7.6048	77.2538
13	48	13_48	8.0386	8.0639	81.9176
13	49	13_49	8.8968	8.9165	90.5788
13	50	13_50	9.6635	9.6775	98.3094
13	51	13_51	10.3192	10.3388	105.027
13	52	13_52	11.1351	11.1577	113.346
13	53	13_53	11.927	11.9412	121.305
14	1	14_1	0	0.032	0.488264
14	2	14_2	0.032	0.0584	0.891081
14	3	14_3	0.0584	0.0848	1.2939
14	4	14_4	0.0848	0.1112	1.69672
14	5	14_5	0.1112	0.1375	2.09801
14	6	14_6	0.1375	0.1636	2.49625
14	7	14_7	0.1636	0.1897	2.89449
14	8	14_8	0.1897	0.216	3.29578
14	9	14_9	0.216	0.2422	3.69554
14	10	14_10	0.2422	0.2686	4.09836
14	11	14_11	0.2686	0.2949	4.49965
14	12	14_12	0.2949	0.3212	4.90095
14	13	14_13	0.3212	0.3475	5.30224
14	14	14_14	0.3475	0.3738	5.70353
14	15	14_15	0.3738	0.4001	6.10482
14	16	14_16	0.4001	0.4264	6.50611
14	17	14_17	0.4264	0.4528	6.90893
14	18	14_18	0.4528	0.4791	7.31022
14	19	14_19	0.4791	0.5055	7.71304
14	20	14_20	0.5055	0.532	8.11738
14	21	14_21	0.5792	0.6265	9.55928
14	22	14_22	0.674	0.7216	11.0103
14	23	14_23	0.7692	0.8167	12.4614
14	24	14_24	0.8644	0.9122	13.9186
14	25	14_25	0.9596	1.007	15.365
14	26	14_26	1.0546	1.1022	16.8176
14	27	14_27	1.1497	1.1972	18.2672
14	28	14_28	1.2448	1.2925	19.7213
14	29	14_29	1.3402	1.3879	21.1769
14	30	14_30	1.4358	1.4837	22.6386
14	31	14_31	1.531	1.5784	24.0836
14	32	14_32	1.6259	1.6735	25.5347
14	33	14_33	1.7213	1.7691	26.9933
14	34	14_34	1.8165	1.864	28.4413
14	35	14_35	1.9118	1.9596	29.9
14	36	14_36	2.0076	2.0556	31.3648
14	37	14_37	2.3994	2.4307	37.0882
14	38	14_38	2.7745	2.8048	42.7963
14	39	14_39	3.3523	3.3829	51.6171
14	40	14_40	3.7362	3.7574	57.3313
14	41	14_41	4.1163	4.1448	63.2423
14	42	14_42	4.6957	4.721	72.0341
14	43	14_43	5.0691	5.1074	77.9299
14	44	14_44	6.0231	6.0511	92.3291
14	46	14_46	7.7361	7.7639	118.463
14	47	14_47	8.9178	8.9408	136.421
14	48	14_48	9.4502	9.4796	144.642
14	49	14_49	10.4578	10.4806	159.915
14	50	14_50	11.3579	11.3741	173.549
14	51	14_51	12.1277	12.1503	185.392
14	52	14_52	13.0842	13.1103	200.04
14	53	14_53	14.0151	14.0316	214.097
17	1	17_1	0	0.0273	0.324916
17	2	17_2	0.0273	0.0528	0.628409
17	3	17_3	0.0528	0.0785	0.934282
17	4	17_4	0.0785	0.1044	1.24254
17	5	17_5	0.1044	0.1303	1.55079
17	6	17_6	0.1303	0.1562	1.85904
17	7	17_7	0.1562	0.1818	2.16373
17	8	17_8	0.1818	0.2076	2.47079
17	9	17_9	0.2076	0.2332	2.77547
17	10	17_10	0.2332	0.2589	3.08135
17	11	17_11	0.2589	0.2847	3.38841
17	12	17_12	0.2847	0.3106	3.69666
17	13	17_13	0.3106	0.3365	4.00492
17	14	17_14	0.3365	0.3621	4.3096
17	15	17_15	0.3621	0.3878	4.61547
17	16	17_16	0.3878	0.4136	4.92254
17	17	17_17	0.4136	0.4393	5.22841
17	18	17_18	0.4393	0.465	5.53428
17	19	17_19	0.465	0.4908	5.84135
17	20	17_20	0.4908	0.5167	6.1496
17	21	17_21	0.563	0.6094	7.25289
17	22	17_22	0.6559	0.7025	8.36093
17	23	17_23	0.749	0.7956	9.46898
17	24	17_24	0.8422	0.8889	10.5794
17	25	17_25	0.9352	0.9816	11.6827
17	26	17_26	1.0279	1.0742	12.7848
17	27	17_27	1.1206	1.1671	13.8905
17	28	17_28	1.2137	1.2604	15.0009
17	29	17_29	1.3066	1.3529	16.1018
17	30	17_30	1.3993	1.4458	17.2075
17	31	17_31	1.492	1.5382	18.3072
17	32	17_32	1.5849	1.6317	19.42
17	33	17_33	1.6784	1.7252	20.5328
17	34	17_34	1.7715	1.8178	21.6349
17	35	17_35	1.8643	1.9108	22.7417
17	36	17_36	1.9574	2.004	23.851
17	37	17_37	2.3397	2.37	28.207
17	38	17_38	2.7057	2.7354	32.5559
17	39	17_39	3.2699	3.2996	39.2708
17	40	17_40	3.6444	3.6651	43.6209
17	41	17_41	4.0155	4.043	48.1185
17	42	17_42	4.5807	4.605	54.8073
17	43	17_43	4.9448	4.9822	59.2966
17	44	17_44	5.876	5.9036	70.2628
17	46	17_46	7.5484	7.5756	90.1624
17	47	17_47	8.7021	8.7245	103.836
17	48	17_48	9.2218	9.251	110.102
17	49	17_49	10.2058	10.2288	121.74
17	50	17_50	11.0852	11.1012	132.123
17	51	17_51	11.8369	11.8591	141.143
17	52	17_52	12.774	12.7996	152.337
17	53	17_53	13.6795	13.6957	163.002
18	1	18_1	0	0.0285	0.362226
18	2	18_2	0.0285	0.054	0.686323
18	3	18_3	0.054	0.0797	1.01296
18	4	18_4	0.0797	0.1054	1.3396
18	5	18_5	0.1054	0.1312	1.66751
18	6	18_6	0.1312	0.157	1.99542
18	7	18_7	0.157	0.1826	2.32079
18	8	18_8	0.1826	0.2084	2.6487
18	9	18_9	0.2084	0.2341	2.97534
18	10	18_10	0.2341	0.2598	3.30198
18	11	18_11	0.2598	0.2856	3.62988
18	12	18_12	0.2856	0.3116	3.96034
18	13	18_13	0.3116	0.3375	4.28952
18	14	18_14	0.3375	0.3631	4.61489
18	15	18_15	0.3631	0.389	4.94407
18	16	18_16	0.389	0.4149	5.27325
18	17	18_17	0.4149	0.4407	5.60116
18	18	18_18	0.4407	0.4665	5.92907
18	19	18_19	0.4665	0.4924	6.25825
18	20	18_20	0.4924	0.5183	6.58743
18	21	18_21	0.5637	0.6092	7.74274
18	22	18_22	0.656	0.7029	8.93363
18	23	18_23	0.7478	0.7927	10.075
18	24	18_24	0.8394	0.886	11.2608
18	25	18_25	0.9295	0.973	12.3665
18	26	18_26	1.016	1.0589	13.4583
18	27	18_27	1.0963	1.1336	14.4077
18	28	18_28	1.1723	1.2109	15.3902
18	29	18_29	1.2559	1.3008	16.5328
18	30	18_30	1.3462	1.3917	17.6881
18	31	18_31	1.437	1.4823	18.8396
18	32	18_32	1.528	1.5738	20.0025
18	33	18_33	1.6198	1.6658	21.1718
18	34	18_34	1.7114	1.757	22.3309
18	35	18_35	1.8026	1.8482	23.49
18	36	18_36	1.8941	1.9399	24.6555
18	37	18_37	2.2607	2.2893	29.0963
18	38	18_38	2.6101	2.6372	33.518
18	39	18_39	3.1481	3.1757	40.3621
18	40	18_40	3.5053	3.5245	44.7953
18	41	18_41	3.8594	3.8854	49.3822
18	42	18_42	4.3993	4.4203	56.1806
18	43	18_43	4.7451	4.7811	60.7663
18	44	18_44	5.6354	5.6621	71.9635
18	46	18_46	7.2343	7.2607	92.2812
18	47	18_47	8.3374	8.3599	106.252
18	48	18_48	8.8352	8.8647	112.668
18	49	18_49	9.7774	9.8001	124.556
18	50	18_50	10.6186	10.635	135.167
18	51	18_51	11.3382	11.361	144.395
18	52	18_52	12.2373	12.2638	155.869
18	53	18_53	13.103	13.1197	166.747
3	1	3_1	0	0.0239	0.263744
3	2	3_2	0.0239	0.0409	0.451345
3	3	3_3	0.0409	0.0613	0.676465
3	4	3_4	0.0613	0.0761	0.839788
3	5	3_5	0.0761	0.1125	1.24147
3	6	3_6	0.1125	0.1483	1.63654
3	7	3_7	0.1483	0.1841	2.0316
3	8	3_8	0.1841	0.22	2.42777
3	9	3_9	0.22	0.2585	2.85263
3	10	3_10	0.2585	0.2939	3.24328
3	11	3_11	0.2939	0.3292	3.63283
3	12	3_12	0.3292	0.3646	4.02348
3	13	3_13	0.3646	0.3813	4.20777
3	14	3_14	0.3813	0.4165	4.59621
3	16	3_16	0.592	0.6316	6.96991
3	18	3_18	0.8747	0.9037	9.97262
3	20	3_20	1.081	1.1168	12.3242
3	23	3_23	1.1881	1.2238	13.505
3	26	3_26	1.2957	1.3315	14.6935
3	29	3_29	1.4026	1.4384	15.8732
3	32	3_32	1.5103	1.5465	17.0661
3	35	3_35	1.6182	1.654	18.2524
3	38	3_38	1.7193	1.7553	19.3703
3	41	3_41	1.8271	1.863	20.5588
3	44	3_44	1.9347	1.9706	21.7462
3	48	3_48	2.0773	2.1122	23.3088
3	52	3_52	2.2182	2.2537	24.8703
3	56	3_56	2.3608	2.3966	26.4472
3	62	3_62	2.5742	2.578	28.4491
3	66	3_66	3.8359	3.8452	42.433
3	67	3_67	5.362	5.418	59.7894
3	68	3_68	5.8411	5.8909	65.008
3	69	3_69	6.4581	6.5015	71.7461
3	70	3_70	8.617	8.6636	95.6056
3	71	3_71	11.8503	11.8963	131.279
3	72	3_72	12.7425	12.9248	142.629
3	73	3_73	14.669	14.7181	162.419
3	74	3_74	15.7615	15.8089	174.456
3	75	3_75	17.7259	17.7819	196.229
4	1	4_1	0	0.018	0.183646
4	2	4_2	0.018	0.038	0.387697
4	3	4_3	0.038	0.0471	0.48054
4	4	4_4	0.0471	0.0771	0.786616
4	5	4_5	0.0771	0.1063	1.08453
4	6	4_6	0.1063	0.1357	1.38448
4	7	4_7	0.1357	0.165	1.68342
4	8	4_8	0.165	0.1966	2.00582
4	9	4_9	0.1966	0.2256	2.30169
4	10	4_10	0.2256	0.2545	2.59655
4	11	4_11	0.2545	0.284	2.89752
4	12	4_12	0.284	0.3139	3.20258
4	13	4_13	0.3139	0.3427	3.49641
4	15	4_15	0.3994	0.4315	4.4024
4	17	4_17	0.4886	0.5125	5.2288
4	19	4_19	0.5698	0.5991	6.11234
4	20	4_20	0.5991	0.6282	6.40924
4	23	4_23	0.6865	0.7157	7.30196
4	26	4_26	0.7744	0.8034	8.19672
4	29	4_29	0.8619	0.8911	9.09148
4	32	4_32	0.95	0.9794	9.99237
4	35	4_35	1.0378	1.0671	10.8871
4	38	4_38	1.1258	1.1552	11.786
4	41	4_41	1.2135	1.2429	12.6807
4	44	4_44	1.3017	1.331	13.5796
4	48	4_48	1.4173	1.446	14.7529
4	52	4_52	1.5333	1.5624	15.9404
4	56	4_56	1.6503	1.6792	17.1321
4	61	4_61	1.7963	1.8256	18.6258
4	65	4_65	2.5096	2.5371	25.8849
4	66	4_66	2.858	2.8657	29.2374
4	67	4_67	4.1104	4.1564	42.4058
4	68	4_68	4.5036	4.5446	46.3665
4	69	4_69	5.01	5.0452	51.4739
4	70	4_70	6.7812	6.8306	69.6895
4	71	4_71	9.4457	9.4835	96.7558
4	72	4_72	10.1779	10.3275	105.367
4	73	4_73	11.7588	11.8017	120.407
4	74	4_74	12.6578	12.6994	129.566
4	75	4_75	14.2725	14.3214	146.115
13	1	13_1	0	0.0206	0.209266
13	2	13_2	0.0206	0.043	0.436818
13	3	13_3	0.043	0.0687	0.697893
13	4	13_4	0.0687	0.0912	0.92646
13	5	13_5	0.0912	0.1136	1.15401
13	6	13_6	0.1136	0.1361	1.38258
13	7	13_7	0.1361	0.1584	1.60912
13	8	13_8	0.1584	0.1805	1.83362
13	9	13_9	0.1805	0.2028	2.06015
13	10	13_10	0.2028	0.2253	2.28872
13	11	13_11	0.2253	0.2477	2.51627
13	12	13_12	0.2477	0.2702	2.74484
13	13	13_13	0.2702	0.292	2.9663
13	14	13_14	0.292	0.3144	3.19385
13	15	13_15	0.3144	0.3368	3.4214
13	16	13_16	0.3368	0.3593	3.64997
13	17	13_17	0.3593	0.3817	3.87752
13	18	13_18	0.3817	0.4042	4.10609
13	19	13_19	0.4042	0.4267	4.33466
13	20	13_20	0.4267	0.4492	4.56322
13	21	13_21	0.4895	0.5298	5.382
13	22	13_22	0.5703	0.6109	6.20586
13	23	13_23	0.6514	0.6919	7.0287
13	24	13_24	0.7326	0.7732	7.85459
13	25	13_25	0.8137	0.8542	8.67744
13	26	13_26	0.8947	0.9352	9.50028
13	27	13_27	0.9755	1.0159	10.3201
13	28	13_28	1.0565	1.0971	11.145
13	29	13_29	1.1378	1.1785	11.9719
13	30	13_30	1.2193	1.2601	12.8008
13	31	13_31	1.3004	1.3408	13.6206
13	32	13_32	1.3811	1.4214	14.4394
13	33	13_33	1.4622	1.5029	15.2673
13	34	13_34	1.5432	1.5835	16.0861
13	35	13_35	1.6242	1.6649	16.913
13	36	13_36	1.7058	1.7466	17.7429
13	37	13_37	2.0394	2.0662	20.9896
13	38	13_38	2.359	2.3847	24.2251
13	39	13_39	2.8509	2.877	29.2262
13	40	13_40	3.1778	3.1958	32.4647
13	41	13_41	3.5015	3.5203	35.7612
13	42	13_42	3.9894	4.0111	40.747
13	43	13_43	4.3075	4.3403	44.0912
13	44	13_44	5.12	5.1441	52.2566
13	46	13_46	6.5789	6.6027	67.0739
13	47	13_47	7.5853	7.6048	77.2538
13	48	13_48	8.0386	8.0639	81.9176
13	49	13_49	8.8968	8.9165	90.5788
13	50	13_50	9.6635	9.6775	98.3094
13	51	13_51	10.3192	10.3388	105.027
13	52	13_52	11.1351	11.1577	113.346
13	53	13_53	11.927	11.9412	121.305
14	1	14_1	0	0.032	0.488264
14	2	14_2	0.032	0.0584	0.891081
14	3	14_3	0.0584	0.0848	1.2939
14	4	14_4	0.0848	0.1112	1.69672
14	5	14_5	0.1112	0.1375	2.09801
14	6	14_6	0.1375	0.1636	2.49625
14	7	14_7	0.1636	0.1897	2.89449
14	8	14_8	0.1897	0.216	3.29578
14	9	14_9	0.216	0.2422	3.69554
14	10	14_10	0.2422	0.2686	4.09836
14	11	14_11	0.2686	0.2949	4.49965
14	12	14_12	0.2949	0.3212	4.90095
14	13	14_13	0.3212	0.3475	5.30224
14	14	14_14	0.3475	0.3738	5.70353
14	15	14_15	0.3738	0.4001	6.10482
14	16	14_16	0.4001	0.4264	6.50611
14	17	14_17	0.4264	0.4528	6.90893
14	18	14_18	0.4528	0.4791	7.31022
14	19	14_19	0.4791	0.5055	7.71304
14	20	14_20	0.5055	0.532	8.11738
14	21	14_21	0.5792	0.6265	9.55928
14	22	14_22	0.674	0.7216	11.0103
14	23	14_23	0.7692	0.8167	12.4614
14	24	14_24	0.8644	0.9122	13.9186
14	25	14_25	0.9596	1.007	15.365
14	26	14_26	1.0546	1.1022	16.8176
14	27	14_27	1.1497	1.1972	18.2672
14	28	14_28	1.2448	1.2925	19.7213
14	29	14_29	1.3402	1.3879	21.1769
14	30	14_30	1.4358	1.4837	22.6386
14	31	14_31	1.531	1.5784	24.0836
14	32	14_32	1.6259	1.6735	25.5347
14	33	14_33	1.7213	1.7691	26.9933
14	34	14_34	1.8165	1.864	28.4413
14	35	14_35	1.9118	1.9596	29.9
14	36	14_36	2.0076	2.0556	31.3648
14	37	14_37	2.3994	2.4307	37.0882
14	38	14_38	2.7745	2.8048	42.7963
14	39	14_39	3.3523	3.3829	51.6171
14	40	14_40	3.7362	3.7574	57.3313
14	41	14_41	4.1163	4.1448	63.2423
14	42	14_42	4.6957	4.721	72.0341
14	43	14_43	5.0691	5.1074	77.9299
14	44	14_44	6.0231	6.0511	92.3291
14	46	14_46	7.7361	7.7639	118.463
14	47	14_47	8.9178	8.9408	136.421
14	48	14_48	9.4502	9.4796	144.642
14	49	14_49	10.4578	10.4806	159.915
14	50	14_50	11.3579	11.3741	173.549
14	51	14_51	12.1277	12.1503	185.392
14	52	14_52	13.0842	13.1103	200.04
14	53	14_53	14.0151	14.0316	214.097
17	1	17_1	0	0.0273	0.324916
17	2	17_2	0.0273	0.0528	0.628409
17	3	17_3	0.0528	0.0785	0.934282
17	4	17_4	0.0785	0.1044	1.24254
17	5	17_5	0.1044	0.1303	1.55079
17	6	17_6	0.1303	0.1562	1.85904
17	7	17_7	0.1562	0.1818	2.16373
17	8	17_8	0.1818	0.2076	2.47079
17	9	17_9	0.2076	0.2332	2.77547
17	10	17_10	0.2332	0.2589	3.08135
17	11	17_11	0.2589	0.2847	3.38841
17	12	17_12	0.2847	0.3106	3.69666
17	13	17_13	0.3106	0.3365	4.00492
17	14	17_14	0.3365	0.3621	4.3096
17	15	17_15	0.3621	0.3878	4.61547
17	16	17_16	0.3878	0.4136	4.92254
17	17	17_17	0.4136	0.4393	5.22841
17	18	17_18	0.4393	0.465	5.53428
17	19	17_19	0.465	0.4908	5.84135
17	20	17_20	0.4908	0.5167	6.1496
17	21	17_21	0.563	0.6094	7.25289
17	22	17_22	0.6559	0.7025	8.36093
17	23	17_23	0.749	0.7956	9.46898
17	24	17_24	0.8422	0.8889	10.5794
17	25	17_25	0.9352	0.9816	11.6827
17	26	17_26	1.0279	1.0742	12.7848
17	27	17_27	1.1206	1.1671	13.8905
17	28	17_28	1.2137	1.2604	15.0009
17	29	17_29	1.3066	1.3529	16.1018
17	30	17_30	1.3993	1.4458	17.2075
17	31	17_31	1.492	1.5382	18.3072
17	32	17_32	1.5849	1.6317	19.42
17	33	17_33	1.6784	1.7252	20.5328
17	34	17_34	1.7715	1.8178	21.6349
17	35	17_35	1.8643	1.9108	22.7417
17	36	17_36	1.9574	2.004	23.851
17	37	17_37	2.3397	2.37	28.207
17	38	17_38	2.7057	2.7354	32.5559
17	39	17_39	3.2699	3.2996	39.2708
17	40	17_40	3.6444	3.6651	43.6209
17	41	17_41	4.0155	4.043	48.1185
17	42	17_42	4.5807	4.605	54.8073
17	43	17_43	4.9448	4.9822	59.2966
17	44	17_44	5.876	5.9036	70.2628
17	46	17_46	7.5484	7.5756	90.1624
17	47	17_47	8.7021	8.7245	103.836
17	48	17_48	9.2218	9.251	110.102
17	49	17_49	10.2058	10.2288	121.74
17	50	17_50	11.0852	11.1012	132.123
17	51	17_51	11.8369	11.8591	141.143
17	52	17_52	12.774	12.7996	152.337
17	53	17_53	13.6795	13.6957	163.002
18	1	18_1	0	0.0285	0.362226
18	2	18_2	0.0285	0.054	0.686323
18	3	18_3	0.054	0.0797	1.01296
18	4	18_4	0.0797	0.1054	1.3396
18	5	18_5	0.1054	0.1312	1.66751
18	6	18_6	0.1312	0.157	1.99542
18	7	18_7	0.157	0.1826	2.32079
18	8	18_8	0.1826	0.2084	2.6487
18	9	18_9	0.2084	0.2341	2.97534
18	10	18_10	0.2341	0.2598	3.30198
18	11	18_11	0.2598	0.2856	3.62988
18	12	18_12	0.2856	0.3116	3.96034
18	13	18_13	0.3116	0.3375	4.28952
18	14	18_14	0.3375	0.3631	4.61489
18	15	18_15	0.3631	0.389	4.94407
18	16	18_16	0.389	0.4149	5.27325
18	17	18_17	0.4149	0.4407	5.60116
18	18	18_18	0.4407	0.4665	5.92907
18	19	18_19	0.4665	0.4924	6.25825
18	20	18_20	0.4924	0.5183	6.58743
18	21	18_21	0.5637	0.6092	7.74274
18	22	18_22	0.656	0.7029	8.93363
18	23	18_23	0.7478	0.7927	10.075
18	24	18_24	0.8394	0.886	11.2608
18	25	18_25	0.9295	0.973	12.3665
18	26	18_26	1.016	1.0589	13.4583
18	27	18_27	1.0963	1.1336	14.4077
18	28	18_28	1.1723	1.2109	15.3902
18	29	18_29	1.2559	1.3008	16.5328
18	30	18_30	1.3462	1.3917	17.6881
18	31	18_31	1.437	1.4823	18.8396
18	32	18_32	1.528	1.5738	20.0025
18	33	18_33	1.6198	1.6658	21.1718
18	34	18_34	1.7114	1.757	22.3309
18	35	18_35	1.8026	1.8482	23.49
18	36	18_36	1.8941	1.9399	24.6555
18	37	18_37	2.2607	2.2893	29.0963
18	38	18_38	2.6101	2.6372	33.518
18	39	18_39	3.1481	3.1757	40.3621
18	40	18_40	3.5053	3.5245	44.7953
18	41	18_41	3.8594	3.8854	49.3822
18	42	18_42	4.3993	4.4203	56.1806
[truncated: 29,762 more rows]
